# Supplementary material for: δ-Regioselective heteroarylation of free alcohols through 1,5-hydrogen-atom transfer
Source: Royal Society of Chemistry journal article supplement (doi:10.1039/d0qo01238f), 2020-11-12

## Supporting Information

Jiadi Zhou,<sup>a</sup> Cheng Cheng,<sup>b</sup> Zhihao Lin,<sup>b</sup> Quanlei Ren,<sup>b</sup> Ning Xu,<sup>b</sup> Jiangfeng Lin,<sup>b</sup> Yimin Qin,<sup>b</sup> and Jianjun Li<sup>a,b\*</sup>

<sup>a</sup> Collaborative Innovation Center of Yangtze River Delta Region Green Pharmaceuticals, National Engineering Research Center for Process Development of Active Pharmaceutical Ingredients, Zhejiang University of Technology, Hangzhou 310014, P. R. of China.

<sup>b</sup> College of Pharmaceutical Sciences, Zhejiang University of Technology, Hangzhou 310014, P. R. of China.

\*E-mail: lijianjun@zjut.edu.cn

|                                                          |         |
|----------------------------------------------------------|---------|
| <b>Context</b>                                           | S2      |
| General methods                                          | S2      |
| General procedure and characterization of the products   | S2-S18  |
| Copies of <sup>1</sup> H and <sup>13</sup> C NMR spectra | S18-S51 |

## **General methods**

The reagents and solvents were purchased from commercial suppliers and used without further purification unless noted. All reactions were monitored by TLC with silica gel-coated plates. The oil bath was used for the reactions that require heating.  $^1\text{H}$  (400 MHz) NMR and  $^{13}\text{C}$  (101 MHz) NMR spectra were recorded on a Varian spectrometer in  $\text{CDCl}_3$  or  $\text{DMSO-}d_6$  using tetramethylsilane (TMS) as internal standards. Data are reported as follows: Chemical shift (number of protons, multiplicity, coupling constants). Coupling constants were quoted to the nearest 0.1 Hz and multiplicity

reported according to the following convention: s = singlet, d = doublet, t = triplet, q = quartet, m = multiplet, dd = doublet of doublets, dt = doublet of triplets, td = triplet of doublets, ddd = doublet of doublet of doublets, br s = broad singlet. Mass spectra were measured with a HRMS-APCI instrument using ESI ionization.

**General procedure for the remote C(sp<sup>3</sup>)-H bond heteroarylation.** A mixture of Heteroarylation **1** (0.3 mmol, 1.0 equiv.), alcohol **2** (0.9 mmol, 3.0 equiv.), AgNO<sub>3</sub> (0.06mmol, 20 mol%), K<sub>2</sub>S<sub>2</sub>O<sub>8</sub> (0.6 mmol, 2.0 equiv.) in a 10 mL Schlenk tube was added the Acetone/H<sub>2</sub>O (1 mL/ 1mL) under N<sub>2</sub> atmosphere. The mixture was stirred at 50°C for 24 h. The reaction mixture was quenched by NaHCO<sub>3</sub> and then extracted with ethyl acetate (3 × 10 mL). The combined organic extracts were washed by brine, dried over Na<sub>2</sub>SO<sub>4</sub>, filtered, concentrated under reduced pressure and purified by column chromatography (petroleum ether/ethyl acetate = 6/1 – 1/2, or methylene chloride/methanol = 30/1 – 20/1) on silica gel to give the products **3a-3ai**.

### Characterization of the products

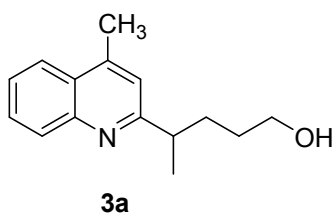

**4-(4-Methylquinolin-2-yl)pentan-1-ol (3a):** petroleum ether/ethyl acetate = 1/1 as an eluent; yellow oil; 54.3 mg, 79% yield; <sup>1</sup>H NMR (400 MHz, CDCl<sub>3</sub>) δ 8.02 (d, *J* = 8.4 Hz, 1H), 7.92 (d, *J* = 8.4 Hz, 1H), 7.64 (t, *J* = 7.4 Hz, 1H), 7.48 (t, *J* = 7.6 Hz, 1H), 7.13 (s, 1H), 3.65 – 3.56 (m, 2H), 3.26 (br s, 1H), 3.13 – 3.04 (m, 1H), 2.66 (s, 3H), 1.96 – 1.86 (m, 1H), 1.79 – 1.70 (m, 1H), 1.67 – 1.56 (m, 1H), 1.51 – 1.41 (m, 1H), 1.34 (d, *J* = 7.2 Hz, 3H); <sup>13</sup>C NMR (101 MHz, CDCl<sub>3</sub>) δ 166.3, 147.2, 144.8, 129.2, 129.2, 127.0, 125.6, 123.6, 120.2, 62.4, 42.2, 33.0, 30.7, 21.0, 18.9. **HRMS:** Calcd for C<sub>15</sub>H<sub>20</sub>NO

[M+H<sup>+</sup>]: 230.1539, Found: 230.1532

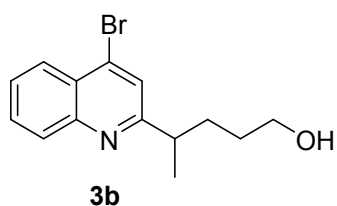

**4-(4-Bromoquinolin-2-yl)pentan-1-ol (3b)**: petroleum ether/ethyl acetate = 2/1 as an eluent; yellow oil; 53.8 mg, 61% yield; <sup>1</sup>H NMR (400 MHz, CDCl<sub>3</sub>) δ 8.12 (d, *J* = 8.4 Hz, 1H), 8.01 (d, *J* = 8.4 Hz, 1H), 7.70 (t, *J* = 7.2 Hz, 1H), 7.60 (s, 1H), 7.56 (t, *J* = 7.6 Hz, 1H), 3.66 – 3.57 (m, 2H), 3.13 – 3.04 (m, 1H), 2.60 (br s, 1H), 1.95 – 1.86 (m, 1H), 1.79 – 1.71 (m, 1H), 1.67 – 1.56 (m, 1H), 1.52 – 1.43 (m, 1H), 1.36 (d, *J* = 7.2 Hz, 3H). <sup>13</sup>C NMR (101 MHz, CDCl<sub>3</sub>) δ 166.7, 148.2, 134.7, 130.5, 129.2, 127.2, 126.7, 126.6, 123.8, 62.6, 42.2, 33.0, 30.7, 20.9. **HRMS**: Calcd for C<sub>14</sub>H<sub>17</sub>BrNO [M+H<sup>+</sup>]: 294.0488, Found: 294.0478

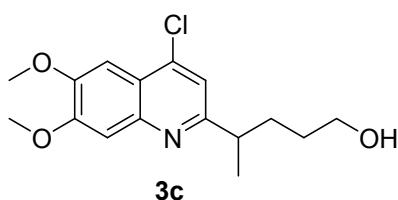

**4-(4-Chloro-6,7-dimethoxyquinolin-2-yl)pentan-1-ol (3c)**: petroleum ether/ethyl acetate = 1/1 as an eluent; yellow oil; 47.5 mg, 51% yield; <sup>1</sup>H NMR (400 MHz, CDCl<sub>3</sub>) δ 7.34 (s, 2H), 7.24 (s, 1H), 4.02 (d, *J* = 7.6 Hz, 6H), 3.66 – 3.56 (m, 2H), 3.07 – 2.99 (m, 1H), 2.43 (br s, 1H), 1.92 – 1.82 (m, 1H), 1.78 – 1.69 (m, 1H), 1.64 – 1.55 (m, 1H), 1.52 – 1.43 (m, 1H), 1.34 (d, *J* = 7.2 Hz, 3H). <sup>13</sup>C NMR (101 MHz, CDCl<sub>3</sub>) δ 164.5, 153.1, 150.2, 145.5, 141.0, 120.5, 118.0, 107.9, 101.8, 62.7, 56.4, 56.3, 42.1, 33.3, 30.8, 21.1. **HRMS**: Calcd. for C<sub>16</sub>H<sub>21</sub>ClNO [M+H<sup>+</sup>]: 310.1204, Found: 310.1196

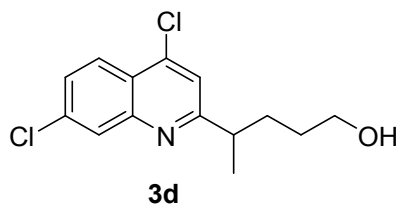

**4-(4,7-Dichloroquinolin-2-yl)pentan-1-ol (3d)**: petroleum ether/ethyl acetate = 6/1 as an eluent; yellow oil; 47.7 mg, 56% yield;  $^1\text{H NMR}$  (400 MHz,  $\text{CDCl}_3$ )  $\delta$  8.10 (d,  $J = 8.8$  Hz, 1H), 8.05 (d,  $J = 2.0$  Hz, 1H), 7.52 (dd,  $J = 8.9, 2.1$  Hz, 1H), 7.38 (s, 1H), 3.67 – 3.58 (m, 2H), 3.12 – 3.04 (m, 1H), 2.11 (br s, 1H), 1.95 – 1.86 (m, 1H), 1.81 – 1.71 (m, 1H), 1.66 – 1.55 (m, 1H), 1.52 – 1.43 (m, 1H), 1.36 (d,  $J = 6.8$  Hz, 3H).  $^{13}\text{C NMR}$  (101 MHz,  $\text{CDCl}_3$ )  $\delta$  168.1, 149.0, 143.0, 136.5, 128.3, 127.9, 125.5, 123.8, 120.3, 62.7, 42.4, 32.9, 30.7, 20.9. **HRMS**: Calcd for  $\text{C}_{14}\text{H}_{16}\text{Cl}_2\text{NO}$  [ $\text{M}+\text{H}^+$ ]: 284.0603, Found: 284.0601

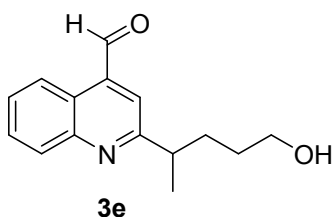

**2-(5-Hydroxypentan-2-yl)quinoline-4-carbaldehyde (3e)**: petroleum ether/ethyl acetate = 1/1 as an eluent; yellow oil; 30.7 mg, 42% yield;  $^1\text{H NMR}$  (400 MHz,  $\text{CDCl}_3$ )  $\delta$  10.49 (s, 1H), 8.93 (d,  $J = 8.4$  Hz, 1H), 8.13 (d,  $J = 8.4$  Hz, 1H), 7.76 (t,  $J = 7.8$  Hz, 1H), 7.69 (s, 1H), 7.65 (t,  $J = 7.8$  Hz, 1H), 3.68 – 3.59 (m, 2H), 3.28 – 3.19 (m, 1H), 2.39 (br s, 1H), 2.03 – 1.92 (m, 1H), 1.87 – 1.78 (m, 1H), 1.69 – 1.58 (m, 1H), 1.54 – 1.46 (m, 1H), 1.43 (d,  $J = 6.8$  Hz, 3H).  $^{13}\text{C NMR}$  (101 MHz,  $\text{CDCl}_3$ )  $\delta$  193.2, 166.9, 148.9, 137.6, 130.2, 129.5, 128.5, 125.1, 124.3, 122.8, 62.7, 42.4, 33.0, 30.7, 20.9. **HRMS**: Calcd for  $\text{C}_{15}\text{H}_{18}\text{NO}_2$  [ $\text{M}+\text{H}^+$ ]: 244.1332, Found: 244.1324

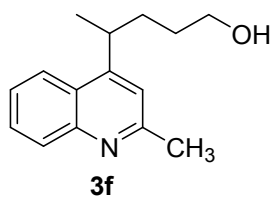

**4-(2-Methylquinolin-4-yl)pentan-1-ol (3f)**: petroleum ether/ethyl acetate = 1/1 as an eluent; yellow oil; 59.2 mg, 86% yield;  $^1\text{H NMR}$  (400 MHz,  $\text{CDCl}_3$ )  $\delta$  8.01 (dd,  $J = 8.4, 1.6$  Hz, 2H), 7.62 (ddd,  $J = 8.3, 6.8, 1.4$  Hz, 1H), 7.46 (ddd,  $J = 8.3, 6.8, 1.3$  Hz, 1H), 7.14 (s, 1H), 3.63 (t,  $J = 6.6$  Hz, 2H), 3.60 – 3.52 (m, 1H), 2.68 (s, 3H), 2.55 (br s, 1H), 1.90 – 1.71 (m, 2H), 1.66 – 1.46 (m, 2H), 1.35 (d,  $J = 6.8$  Hz, 3H).  $^{13}\text{C NMR}$  (101 MHz,  $\text{CDCl}_3$ )  $\delta$  158.7, 153.6, 148.1, 129.4, 129.1, 125.6, 122.9, 118.6, 62.6, 33.6, 33.3, 30.8, 25.4, 21.3. **HRMS**: Calcd for  $\text{C}_{15}\text{H}_{20}\text{NO}$   $[\text{M}+\text{H}^+]$ : 230.1539, Found: 230.1539

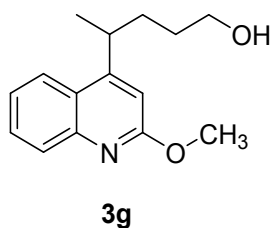

**4-(2-Methoxyquinolin-4-yl)pentan-1-ol (3g)**: petroleum ether/ethyl acetate = 4/1 as an eluent; yellow oil; 47.8 mg, 65% yield;  $^1\text{H NMR}$  (400 MHz,  $\text{CDCl}_3$ )  $\delta$  7.94 (d,  $J = 8.0$  Hz, 1H), 7.88 (dd,  $J = 8.4, 0.8$  Hz, 1H), 7.59 (ddd,  $J = 8.3, 6.9, 1.4$  Hz, 1H), 7.37 (ddd,  $J = 8.3, 6.9, 1.3$  Hz, 1H), 6.79 (s, 1H), 4.06 (s, 3H), 3.58 (t,  $J = 6.4$  Hz, 2H), 3.53 – 3.45 (m, 1H), 2.01 (br s, 1H), 1.88 – 1.79 (m, 1H), 1.76 – 1.67 (m, 1H), 1.63 – 1.48 (m, 2H), 1.34 (d,  $J = 6.8$  Hz, 3H).  $^{13}\text{C NMR}$  (101 MHz,  $\text{CDCl}_3$ )  $\delta$  162.7, 156.0, 147.3, 129.2, 128.3, 124.4, 123.9, 123.0, 109.3, 62.8, 53.3, 33.3, 33.3, 30.7, 21.2. **HRMS**: Calcd for  $\text{C}_{15}\text{H}_{20}\text{NO}_2$   $[\text{M}+\text{H}^+]$ : 246.1489, Found: 246.1440

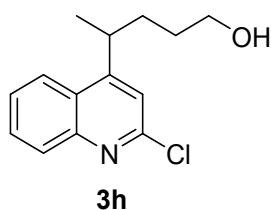

**4-(2-Chloroquinolin-4-yl)pentan-1-ol (3h):** petroleum ether/ethyl acetate = 3/1 as an eluent; yellow oil; 42.7 mg, 57% yield; <sup>1</sup>H NMR (400 MHz, CDCl<sub>3</sub>) δ 8.03 (dd, *J* = 14.0, 8.4 Hz, 2H), 7.70 (t, *J* = 7.4 Hz, 1H), 7.55 (t, *J* = 7.6 Hz, 1H), 7.27 (s, 1H), 3.64 (t, *J* = 6.4 Hz, 2H), 3.61 – 3.54 (m, 1H), 1.96 (br s, 1H), 1.91 – 1.73 (m, 2H), 1.68 – 1.48 (m, 2H), 1.38 (d, *J* = 6.8 Hz, 3H). <sup>13</sup>C NMR (101 MHz, CDCl<sub>3</sub>) δ 157.2, 151.0, 148.3, 130.2, 129.5, 126.8, 126.0, 123.2, 118.9, 62.6, 33.6, 33.4, 30.6, 21.1. **HRMS:** Calcd for C<sub>14</sub>H<sub>17</sub>ClNO [M+H<sup>+</sup>]: 250.0993, Found: 250.0991

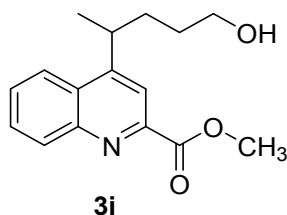

**Methyl 4-(5-hydroxypentan-2-yl)quinoline-2-carboxylate (3i):** Petroleum ether/ethyl acetate = 1/1 as an eluent; yellow oil; 68.1 mg, 83% yield; <sup>1</sup>H NMR (400 MHz, DMSO-*d*<sub>6</sub>) δ 8.32 (d, *J* = 8.0 Hz, 1H), 8.17 (dd, *J* = 8.8, 1.2 Hz, 1H), 7.99 (s, 1H), 7.86 (ddd, *J* = 8.3, 6.8, 1.3 Hz, 1H), 7.76 (ddd, *J* = 8.3, 6.8, 1.4 Hz, 1H), 4.39 (t, *J* = 5.2 Hz, 1H), 3.96 (s, 3H), 3.77 – 3.68 (m, 1H), 3.39 – 3.36 (m, 2H), 1.84 – 1.67 (m, 2H), 1.49 – 1.36 (m, 2H), 1.34 (d, *J* = 6.8 Hz, 3H). <sup>13</sup>C NMR (101 MHz, DMSO-*d*<sub>6</sub>) δ 165.7, 155.3, 147.5, 147.3, 130.8, 130.2, 128.6, 127.7, 123.6, 117.0, 60.6, 52.6, 33.3, 32.7, 30.4, 21.0. **HRMS:** Calcd for C<sub>16</sub>H<sub>20</sub>NO<sub>3</sub> [M+H<sup>+</sup>]: 274.1438, Found: 274.1436

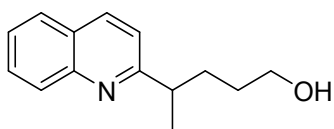

**3j-o**

**4-(Quinolin-2-yl)pentan-1-ol (3j-o):** petroleum ether/ethyl acetate = 2/1 as an eluent; yellow oil; 20.0 mg, 31% yield;  $^1\text{H NMR}$  (400 MHz,  $\text{CDCl}_3$ )  $\delta$  8.10 (d,  $J = 8.4$  Hz, 1H), 8.04 (d,  $J = 8.8$  Hz, 1H), 7.77 (d,  $J = 8.0$  Hz, 1H), 7.70 – 7.65 (m, 1H), 7.49 (t,  $J = 7.4$  Hz, 1H), 7.32 (d,  $J = 8.4$  Hz, 1H), 3.66 – 3.56 (m, 2H), 3.20 – 3.11 (m, 1H), 2.34 (br s, 1H), 2.00 – 1.90 (m, 1H), 1.82 – 1.74 (m, 1H), 1.68 – 1.57 (m, 1H), 1.53 – 1.44 (m, 1H), 1.38 (d,  $J = 6.8$  Hz, 3H).  $^{13}\text{C NMR}$  (101 MHz,  $\text{CDCl}_3$ )  $\delta$  166.7, 147.6, 136.8, 129.6, 128.8, 127.6, 127.1, 126.0, 119.8, 62.7, 42.4, 33.1, 30.8, 21.1. **HRMS:** Calcd for  $\text{C}_{14}\text{H}_{18}\text{NO}$  [ $\text{M}+\text{H}^+$ ]: 216.1383, Found: 216.1378

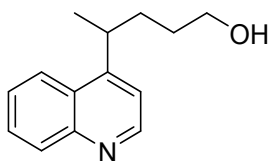

**3j-p**

**4-(Quinolin-4-yl)pentan-1-ol (3j-p):** petroleum ether/ethyl acetate = 2/1 as an eluent; yellow oil; 20.0mg, 31% yield;  $^1\text{H NMR}$  (400 MHz,  $\text{CDCl}_3$ )  $\delta$  8.79 (d,  $J = 4.8$  Hz, 1H), 8.11 (t,  $J = 7.8$  Hz, 2H), 7.69 (t,  $J = 7.8$  Hz, 1H), 7.55 (t,  $J = 7.6$  Hz, 1H), 7.28 (d,  $J = 4.8$  Hz, 1H), 3.67 – 3.58 (m, 3H), 3.09 (br s, 1H), 1.93 – 1.74 (m, 2H), 1.66 – 1.48 (m, 2H), 1.38 (d,  $J = 6.8$  Hz, 3H).  $^{13}\text{C NMR}$  (101 MHz,  $\text{CDCl}_3$ )  $\delta$  153.7, 150.3, 148.4, 130.4, 129.1, 127.4, 126.5, 123.1, 117.8, 62.8, 33.6, 33.4, 30.8, 21.4. **HRMS:** Calcd for  $\text{C}_{14}\text{H}_{18}\text{NO}$  [ $\text{M}+\text{H}^+$ ]: 216.1383, Found: 216.1378



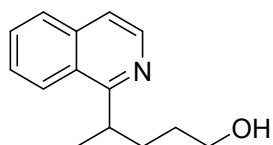

**3k**

**4-(Isoquinolin-1-yl)pentan-1-ol (3k):** petroleum ether/ethyl acetate = 1/1 as an eluent; yellow oil; 30.4 mg, 47% yield;  $^1\text{H NMR}$  (400 MHz,  $\text{CDCl}_3$ )  $\delta$  8.46 (d,  $J = 5.6$  Hz, 1H), 8.21 (d,  $J = 8.4$  Hz, 1H), 7.80 (d,  $J = 8.4$  Hz, 1H), 7.65 (t,  $J = 7.6$  Hz, 1H), 7.58 (t,  $J = 7.8$  Hz, 1H), 7.48 (d,  $J = 5.6$  Hz, 1H), 3.86 – 3.78 (m, 1H), 3.62 – 3.51 (m, 2H), 2.32 (br s, 1H), 2.20 – 2.11 (m, 1H), 1.86 – 1.77 (m, 1H), 1.69 – 1.58 (m, 1H), 1.53 – 1.44 (m, 1H), 1.40 (d,  $J = 6.8$  Hz, 3H).  $^{13}\text{C NMR}$  (101 MHz,  $\text{CDCl}_3$ )  $\delta$  165.6, 141.8, 136.6, 129.8, 127.7, 127.1, 126.9, 124.8, 119.2, 62.8, 36.2, 32.2, 31.1, 21.3. **HRMS:** Calcd for  $\text{C}_{14}\text{H}_{18}\text{NO}$  [ $\text{M}+\text{H}^+$ ]: 216.1383, Found: 216.1382

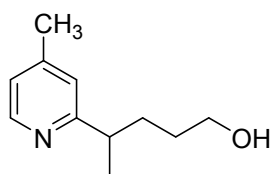

**3l**

**4-(4-Methylpyridin-2-yl)pentan-1-ol (3l):** methylene chloride/methanol = 30/1 as an eluent; yellow oil; 25.3 mg, 47% yield;  $^1\text{H NMR}$  (400 MHz,  $\text{CDCl}_3$ )  $\delta$  8.31 (d,  $J = 5.2$  Hz, 1H), 6.94 (s, 1H), 6.91 – 6.89 (m, 1H), 3.57 (t,  $J = 6.4$  Hz, 2H), 2.92 (br s, 1H), 2.88 – 2.81 (m, 1H), 2.30 (s, 3H), 1.83 – 1.74 (m, 1H), 1.66 – 1.57 (m, 1H), 1.56 – 1.48 (m, 1H), 1.46 – 1.36 (m, 1H), 1.25 (d,  $J = 7.2$  Hz, 3H).  $^{13}\text{C NMR}$  (101 MHz,  $\text{CDCl}_3$ )  $\delta$  166.0, 148.6, 147.8, 122.5, 122.4, 62.6, 41.3, 33.3, 30.7, 21.2, 20.9. **HRMS:** Calcd for  $\text{C}_{11}\text{H}_{18}\text{NO}$  [ $\text{M}+\text{H}^+$ ]: 180.1383, Found: 180.1376

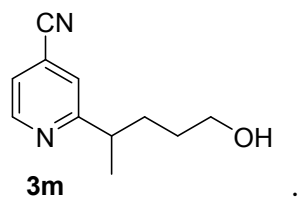

**2-(5-Hydroxypentan-2-yl)isonicotinonitrile (3m)**: petroleum ether/ethyl acetate = 1/2 as an eluent; yellow oil; 26.3 mg, 46% yield;  $^1\text{H NMR}$  (400 MHz,  $\text{CDCl}_3$ )  $\delta$  8.70 (d,  $J = 5.2$  Hz, 1H), 7.37 (s, 1H), 7.34 (dd,  $J = 5.2, 1.6$  Hz, 1H), 3.61 (t,  $J = 6.6$  Hz, 2H), 3.02 – 2.94 (m, 1H), 1.88 (br s, 1H), 1.85 – 1.77 (m, 1H), 1.73 – 1.64 (m, 1H), 1.60 – 1.49 (m, 1H), 1.46 – 1.35 (m, 1H), 1.30 (d,  $J = 7.2$  Hz, 3H).  $^{13}\text{C NMR}$  (101 MHz,  $\text{CDCl}_3$ )  $\delta$  168.1, 150.3, 123.5, 122.8, 120.8, 116.9, 62.7, 41.8, 33.0, 30.6, 20.7. **HRMS**: Calcd for  $\text{C}_{11}\text{H}_{15}\text{N}_2\text{O}$  [ $\text{M}+\text{H}^+$ ]: 191.1179, Found: 191.1169

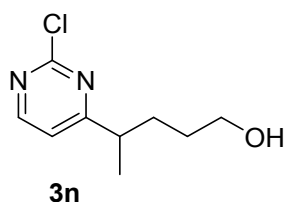

**4-(2-Chloropyrimidin-4-yl)pentan-1-ol (3n)**: petroleum ether/ethyl acetate = 1/1 as an eluent; yellow oil; 36.1 mg, 60% yield;  $^1\text{H NMR}$  (400 MHz,  $\text{CDCl}_3$ )  $\delta$  8.49 (d,  $J = 4.8$  Hz, 1H), 7.11 (d,  $J = 5.2$  Hz, 1H), 3.62 (t,  $J = 6.4$  Hz, 2H), 2.91 – 2.83 (m, 1H), 1.86 – 1.77 (m, 2H), 1.71 – 1.61 (m, 1H), 1.60 – 1.51 (m, 1H), 1.49 – 1.38 (m, 1H), 1.29 (d,  $J = 6.8$  Hz, 3H).  $^{13}\text{C NMR}$  (101 MHz,  $\text{CDCl}_3$ )  $\delta$  178.8, 161.4, 159.4, 117.7, 62.6, 41.4, 32.4, 30.5, 20.0. **HRMS**: Calcd for  $\text{C}_9\text{H}_{13}\text{ClN}_2\text{NaO}$  [ $\text{M}+\text{Na}^+$ ]: 223.0609, Found: 223.0598

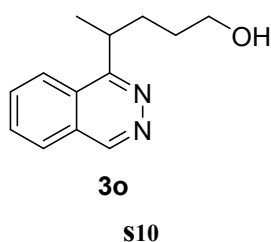

**4-(Phthalazin-1-yl)pentan-1-ol (3o)**: methylene chloride/methanol = 20/1 as an eluent; yellow oil; 34.4 mg, 53% yield;  $^1\text{H NMR}$  (400 MHz,  $\text{CDCl}_3$ )  $\delta$  9.36 (s, 1H), 8.17 (d,  $J = 8.0$  Hz, 1H), 7.95 – 7.84 (m, 3H), 3.81 – 3.73 (m, 1H), 3.66 – 3.57 (m, 2H), 2.41 (br s, 1H), 2.30 – 2.20 (m, 1H), 1.93 – 1.84 (m, 1H), 1.71 – 1.60 (m, 1H), 1.58 – 1.51 (m, 1H), 1.48 (d,  $J = 6.8$  Hz, 3H).  $^{13}\text{C NMR}$  (101 MHz,  $\text{CDCl}_3$ )  $\delta$  163.6, 150.3, 132.6, 132.0, 127.3, 126.7, 125.5, 123.6, 62.8, 35.6, 32.1, 31.0, 20.9. **HRMS**: Calcd for  $\text{C}_{13}\text{H}_{17}\text{N}_2\text{O}$   $[\text{M}+\text{H}^+]$ : 217.1335, Found: 217.1327

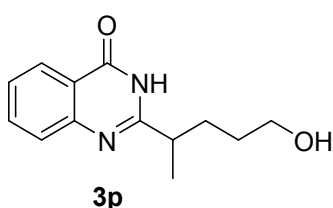

**2-(5-Hydroxypentan-2-yl)quinazolin-4(3H)-one (3p)**: methylene chloride/methanol = 30/1 as an eluent; white solid, m.p. 116-117°C; 49.5 mg, 71% yield;  $^1\text{H NMR}$  (400 MHz,  $\text{DMSO}-d_6$ )  $\delta$  12.12 (s, 1H), 8.09 (dd,  $J = 8.0, 1.6$  Hz, 1H), 7.77 (ddd,  $J = 8.5, 7.1, 1.6$  Hz, 1H), 7.61 (d,  $J = 8.0$  Hz, 1H), 7.46 (ddd,  $J = 8.1, 7.1, 1.2$  Hz, 1H), 4.40 (t,  $J = 5.2$  Hz, 1H), 3.37 – 3.36 (m, 2H), 2.80 – 2.72 (m, 1H), 1.84 – 1.75 (m, 1H), 1.62 – 1.53 (m, 1H), 1.49 – 1.31 (m, 3H), 1.25 (d,  $J = 6.8$  Hz, 3H).  $^{13}\text{C NMR}$  (101 MHz,  $\text{DMSO}-d_6$ )  $\delta$  162.0, 161.2, 149.0, 134.3, 127.0, 125.9, 125.7, 120.9, 60.6, 38.7, 31.1, 30.3, 18.7. **HRMS**: Calcd for  $\text{C}_{13}\text{H}_{17}\text{N}_2\text{O}_2$   $[\text{M}+\text{H}^+]$ : 233.1285, Found: 233.1273

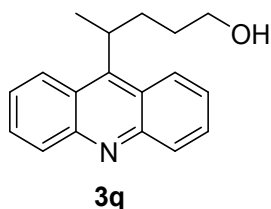

**4-(4-Bromoquinolin-2-yl)pentan-1-ol (3q)**: petroleum ether/ethyl acetate = 2/1 as an

eluent; yellow solid, m.p. 156-157°C; 50.2 mg, 63% yield; **<sup>1</sup>H NMR** (400 MHz, CDCl<sub>3</sub>) δ 8.40 (d, *J* = 31.2 Hz, 2H), 8.21 (d, *J* = 8.8 Hz, 2H), 7.70 (t, *J* = 7.6 Hz, 2H), 7.47 (s, 2H), 4.37 – 4.28 (m, 1H), 3.56 (t, *J* = 6.4 Hz, 2H), 2.52 (br s, 1H), 2.34 – 2.19 (m, 2H), 1.71 (d, *J* = 7.6 Hz, 3H), 1.67 – 1.58 (m, 1H), 1.37 – 1.27 (m, 1H). **<sup>13</sup>C NMR** (101 MHz, CDCl<sub>3</sub>) δ 151.1, 149.0, 148.7, 130.8, 130.4, 129.6, 126.2, 126.0, 125.7, 125.5, 124.7, 124.6, 123.7, 62.6, 34.1, 33.7, 32.1, 21.4. **HRMS**: Calcd for C<sub>18</sub>H<sub>20</sub>NO [M+H<sup>+</sup>]: 266.1539, Found: 266.1531

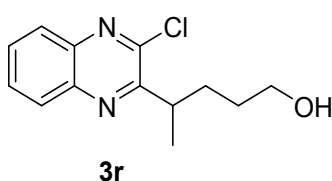

**4-(3-Chloroquinoxalin-2-yl)pentan-1-ol (3r)**: petroleum ether/ethyl acetate = 2/1 as an eluent; yellow oil; 60.9 mg, 81% yield; **<sup>1</sup>H NMR** (400 MHz, CDCl<sub>3</sub>) δ 8.04 – 8.00 (m, 1H), 7.96 – 7.93 (m, 1H), 7.73 – 7.67 (m, 2H), 3.67 – 3.55 (m, 3H), 2.11 – 2.05 (m, 1H), 2.04 (br s 1H), 1.79 – 1.70 (m, 1H), 1.68 – 1.59 (m, 1H), 1.57 – 1.46 (m, 1H), 1.36 (d, *J* = 6.8 Hz, 3H). **<sup>13</sup>C NMR** (101 MHz, CDCl<sub>3</sub>) δ 159.2, 147.6, 141.1, 140.7, 130.1, 130.1, 128.8, 128.1, 62.8, 37.5, 31.5, 30.7, 19.7. **HRMS**: Calcd for C<sub>13</sub>H<sub>16</sub>ClN<sub>2</sub>O [M+H<sup>+</sup>]: 251.0946, Found: 251.0937

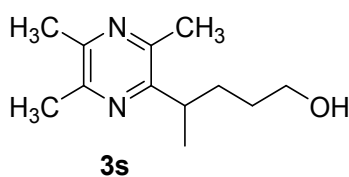

**4-(3,5,6-Trimethylpyrazin-2-yl)pentan-1-ol (3s)**: petroleum ether/ethyl acetate = 2/1 as an eluent; yellow oil; 50.6 mg, 81% yield; **<sup>1</sup>H NMR** (400 MHz, CDCl<sub>3</sub>) δ 3.59 – 3.49 (m, 2H), 3.05 – 2.97 (m, 1H), 2.47 – 2.43 (m, 9H), 2.13 (br s, 1H), 1.94 – 1.84 (m, 1H), 1.67 – 1.50 (m, 2H), 1.41 – 1.31 (m, 1H), 1.19 (d, *J* = 6.8 Hz, 3H). **<sup>13</sup>C NMR** (101 MHz, CDCl<sub>3</sub>) δ 155.2, 148.8, 147.8, 147.2, 62.7, 36.1, 31.7, 30.9, 21.6, 21.4, 20.9, 20.4.

**HRMS:** Calcd for C<sub>12</sub>H<sub>21</sub>N<sub>2</sub>O [M+H<sup>+</sup>]: 209.1648, Found: 209.1641

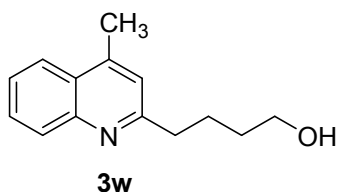

**4-(4-Methylquinolin-2-yl)butan-1-ol (3w):** petroleum ether/ethyl acetate = 1/2 as an eluent; yellow oil; 39.4 mg, 61% yield; <sup>1</sup>H NMR (400 MHz, CDCl<sub>3</sub>) δ 8.06 (d, *J* = 8.4 Hz, 1H), 7.97 (dd, *J* = 8.4, 1.2 Hz, 1H), 7.69 (ddd, *J* = 8.4, 6.9, 1.5 Hz, 1H), 7.53 (ddd, *J* = 8.2, 6.9, 1.3 Hz, 1H), 7.17 (s, 1H), 3.72 (t, *J* = 6.2 Hz, 2H), 3.01 (t, *J* = 7.4 Hz, 2H), 2.70 (s, 3H), 2.60 (br s, 1H), 2.00 – 1.93 (m, 2H), 1.75 – 1.69 (m, 2H). <sup>13</sup>C NMR (101 MHz, CDCl<sub>3</sub>) δ 162.3, 147.4, 144.8, 129.4, 129.1, 126.9, 125.8, 123.7, 122.4, 62.3, 38.1, 32.4, 25.6, 18.8. **HRMS:** Calcd for C<sub>14</sub>H<sub>18</sub>NO [M+H<sup>+</sup>]: 216.1383, Found: 216.1372

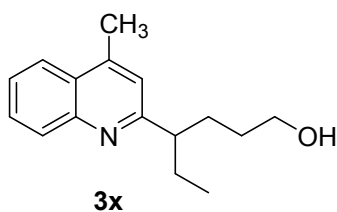

**4-(4-Methylquinolin-2-yl)hexan-1-ol (3x):** petroleum ether/ethyl acetate = 2/1 as an eluent; yellow oil; 53.3 mg, 73% yield; <sup>1</sup>H NMR (400 MHz, CDCl<sub>3</sub>) δ 8.05 (d, *J* = 8.4 Hz, 1H), 7.93 (d, *J* = 8.4 Hz, 1H), 7.67 – 7.63 (m, 1H), 7.51 – 7.47 (m, 1H), 7.11 (s, 1H), 3.62 – 3.53 (m, 2H), 2.95 (br s, 1H), 2.90 – 2.83 (m, 1H), 2.67 (s, 3H), 1.89 – 1.68 (m, 4H), 1.60 – 1.49 (m, 1H), 1.45 – 1.33 (m, 1H), 0.82 (t, *J* = 7.4 Hz, 3H). <sup>13</sup>C NMR (101 MHz, CDCl<sub>3</sub>) δ 165.3, 147.4, 144.7, 129.3, 129.2, 127.1, 125.7, 123.7, 120.8, 62.7, 49.8, 31.5, 30.8, 28.8, 19.0, 12.3. **HRMS:** Calcd for C<sub>16</sub>H<sub>22</sub>NO [M+H<sup>+</sup>]: 244.1696, Found: 244.1687

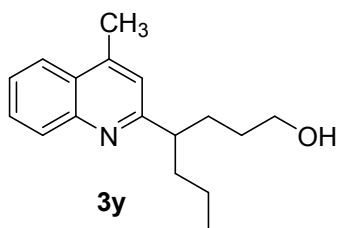

**4-(4-Methylquinolin-2-yl)heptan-1-ol (3y):** petroleum ether/ethyl acetate = 2/1 as an eluent; yellow oil; 59.5 mg, 77% yield;  $^1\text{H NMR}$  (400 MHz,  $\text{CDCl}_3$ )  $\delta$  8.04 (d,  $J = 8.8$  Hz, 1H), 7.93 (d,  $J = 8.4$  Hz, 1H), 7.65 (t,  $J = 7.4$  Hz, 1H), 7.49 (t,  $J = 7.4$  Hz, 1H), 7.11 (s, 1H), 3.63 – 3.53 (m, 2H), 3.00 – 2.92 (m, 1H), 2.74 (br s, 1H), 2.67 (s, 3H), 1.91 – 1.80 (m, 2H), 1.78 – 1.64 (m, 2H), 1.60 – 1.50 (m, 1H), 1.45 – 1.33 (m, 1H), 1.31 – 1.23 (m, 1H), 1.22 – 1.09 (m, 1H), 0.85 (t,  $J = 7.4$  Hz, 3H).  $^{13}\text{C NMR}$  (101 MHz,  $\text{CDCl}_3$ )  $\delta$  165.6, 147.4, 144.6, 129.4, 129.2, 127.1, 125.6, 123.7, 120.8, 62.8, 48.0, 38.2, 31.8, 30.8, 20.9, 19.0, 14.3. **HRMS:** Calcd for  $\text{C}_{17}\text{H}_{24}\text{NO}$   $[\text{M}+\text{H}^+]$ : 258.1852, Found: 258.1841

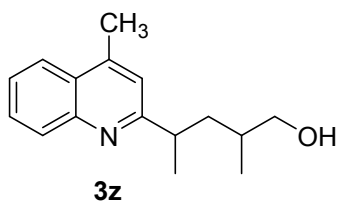

**2-Methyl-4-(4-methylquinolin-2-yl)pentan-1-ol (3z):** (*d.r.* = 1:1), petroleum ether/ethyl acetate = 3/1 as an eluent; yellow oil; 65.0 mg, 89% yield;  $^1\text{H NMR}$  (400 MHz,  $\text{CDCl}_3$ )  $\delta$  8.04 (d,  $J = 8.4$  Hz, 2H), 7.94 (d,  $J = 8.0$  Hz, 2H, two isomers), 7.69 – 7.64 (m, 2H, two isomers), 7.53 – 7.48 (m, 2H, two isomers), 7.17 (d,  $J = 8.0$  Hz, 2H, two isomers), 3.52 – 3.42 (m, 2H, two isomers), 3.39 (d,  $J = 5.6$  Hz, 2H, two isomers), 3.35 – 3.26 (m, 1H, one isomer), 3.23 – 3.14 (m, 1H, one isomer), 2.84 (br s, 2H, two isomers), 2.69 (s, 3H, one isomer), 2.68 (s, 3H, one isomer), 2.25 – 2.18 (m, 1H, one isomer), 1.82 – 1.74 (m, 2H, two isomers), 1.72 – 1.64 (m, 1H, one isomer), 1.58 – 1.50

(m, 1H, one isomer), 1.44 – 1.38 (m, 1H, one isomer), 1.35 (t,  $J = 6.8$  Hz, 6H, two isomers), 0.97 (d,  $J = 6.8$  Hz, 3H, one isomer), 0.87 (d,  $J = 6.4$  Hz, 3H, one isomer).  $^{13}\text{C}$  NMR (101 MHz,  $\text{CDCl}_3$ )  $\delta$  166.6 & 166.2 (two isomers), 147.3 & 147.1 (two isomers), 145.2 & 145.0 (two isomers), 129.4 & 129.4 (two isomers), 129.3 & 129.2 (two isomers), 127.1 & 127.1 (two isomers), 125.8 (two isomers), 123.7 (two isomers), 121.1 & 120.2 (two isomers), 68.4 & 67.8 (two isomers), 41.3 & 40.4 (two isomers), 39.6 & 39.6 (two isomers), 34.6 & 33.7 (two isomers), 22.7 & 21.2 (two isomers), 19.0 & 19.0 (two isomers), 17.7 & 17.6 (two isomers). HRMS: Calcd for  $\text{C}_{16}\text{H}_{22}\text{NO}$   $[\text{M}+\text{H}^+]$ : 244.1696, Found: 244.1688

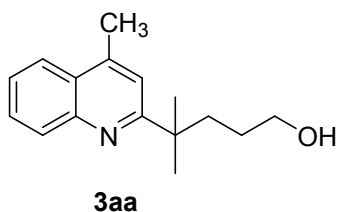

**4-Methyl-4-(4-methylquinolin-2-yl)pentan-1-ol (3aa)**: petroleum ether/ethyl acetate = 5/1 as an eluent; yellow oil; 47.5 mg, 65% yield;  $^1\text{H}$  NMR (400 MHz, Chloroform-*d*)  $\delta$  8.05 (d,  $J = 8.4$  Hz, 1H), 7.93 (dd,  $J = 8.4, 0.8$  Hz, 1H), 7.66 (ddd,  $J = 8.4, 6.9, 1.5$  Hz, 1H), 7.50 (ddd,  $J = 8.2, 6.8, 1.3$  Hz, 1H), 7.32 (s, 1H), 3.55 (t,  $J = 6.2$  Hz, 2H), 2.69 (s, 3H), 2.52 (br s, 1H), 2.00 – 1.95 (m, 2H), 1.53 – 1.46 (m, 2H), 1.43 (s, 6H).  $^{13}\text{C}$  NMR (101 MHz,  $\text{CDCl}_3$ )  $\delta$  167.8, 147.1, 144.3, 129.6, 129.1, 126.6, 125.7, 123.5, 119.6, 63.1, 40.8, 37.9, 28.6, 28.3, 19.1. HRMS: Calcd for  $\text{C}_{16}\text{H}_{22}\text{NO}$   $[\text{M}+\text{H}^+]$ : 244.1696, Found: 244.1691

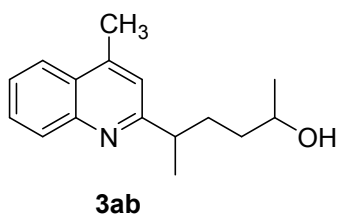

**5-(4-Methylquinolin-2-yl)hexan-2-ol (3ab):** (*d.r.* = 1:1), petroleum ether/ethyl acetate = 2/1 as an eluent; yellow oil; 60.6 mg, 83% yield; **<sup>1</sup>H NMR** (400 MHz, CDCl<sub>3</sub>) δ 8.05 (d, *J* = 8.8 Hz, 2H, two isomers), 7.94 (d, *J* = 8.4 Hz, 2H, two isomers), 7.69 – 7.64 (m, 2H, two isomers), 7.53 – 7.48 (m, two isomers), 7.15 (d, *J* = 2.8 Hz, 2H, two isomers), 3.85 – 3.77 (m, 1H, one isomer), 3.76 – 3.68 (m, 1H, one isomer), 3.14 – 3.04 (m, 2H, two isomers), 2.68 (d, *J* = 0.8 Hz, 6H, two isomers), 2.31 (br s, 2H, two isomers), 2.03 – 1.91 (m, 2H, two isomers), 1.84 – 1.71 (m, 2H, two isomers), 1.57 – 1.47 (m, 2H, two isomers), 1.42 – 1.38 (m, 1H, one isomer), 1.37 (s, 3H, one isomer), 1.35 (s, 3H, one isomer), 1.33 – 1.28 (m, 1H, one isomer), 1.14 (d, *J* = 3.2 Hz, 3H, one isomer), 1.13 (d, *J* = 3.2 Hz, 3H, one isomer). **<sup>13</sup>C NMR** (101 MHz, CDCl<sub>3</sub>) δ 166.3 & 166.3 (two isomers), 147.4 & 147.3 (two isomers), 144.9 & 144.8 (two isomers), 129.4 & 129.4 (two isomers), 129.3 & 129.2 (two isomers), 127.2 (two isomers), 125.8 & 125.7 (two isomers), 123.7 (two isomers), 120.6 & 120.5 (two isomers), 68.2 & 67.7 (two isomers), 42.6 & 42.4 (two isomers), 37.4 & 37.2 (two isomers), 32.7 & 32.6 (two isomers), 23.7 & 23.6 (two isomers), 21.4 & 21.3 (two isomers), 19.0 (two isomers). **HRMS:** Calcd for C<sub>16</sub>H<sub>22</sub>NO [M+H<sup>+</sup>]: 244.1696, Found: 244.1686

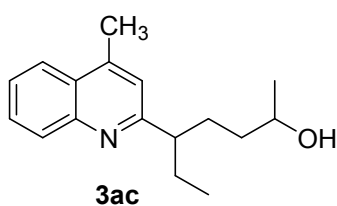

**5-(4-Methylquinolin-2-yl)heptan-2-ol (3ac):** (*d.r.* = 1:1), petroleum ether/ethyl acetate = 2/1 as an eluent; yellow oil; 54.8 mg, 71% yield; **<sup>1</sup>H NMR** (400 MHz, CDCl<sub>3</sub>) δ 8.06 (d, *J* = 8.4 Hz, 2H, two isomers), 7.94 (d, *J* = 8.4 Hz, 2H, two isomers), 7.66 (t, *J* = 7.6 Hz, 2H, two isomers), 7.50 (t, *J* = 7.6 Hz, 2H, two isomers), 7.11 (s, 2H, two isomers), 3.81 – 3.76 (m, 1H, one isomer), 3.71 – 3.66 (m, 1H, one isomer), 2.89 – 2.82 (m, 2H, two isomers), 2.68 (s, 6H, two isomers), 2.49 (br s, 2H, two isomers), 1.93 –



1.74 (m, 8H, two isomers), 1.50 – 1.41 (m, 2H, two isomers), 1.35 – 1.28 (m, 2H, two isomers), 1.13 – 1.09 (m, 6H, two isomers), 0.83 (t,  $J = 7.6$  Hz, 6H, two isomers).  $^{13}\text{C}$  NMR (101 MHz,  $\text{CDCl}_3$ )  $\delta$  165.4 & 165.3 (two isomers), 147.5 & 147.4 (two isomers), 144.6 & 144.5 (two isomers), 129.5 & 129.5 (two isomers), 129.2 & 129.1 (two isomers), 127.2 (two isomers), 125.7 & 125.7 (two isomers), 123.7 & 123.7 (two isomers), 121.0 (two isomers), 68.2 & 67.8 (two isomers), 50.1 & 49.9 (two isomers), 37.4 & 37.2 (two isomers), 31.1 & 31.0 (two isomers), 29.0 & 29.0 (two isomers), 23.6 & 23.6 (two isomers), 19.0 (two isomers), 12.3 & 12.2 (two isomers). HRMS: Calcd for  $\text{C}_{17}\text{H}_{24}\text{NO}$  [ $\text{M}+\text{H}^+$ ]: 258.1852, Found: 258.1842

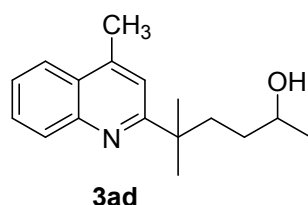

**5-Methyl-5-(4-methylquinolin-2-yl)hexan-2-ol (3ad)**: petroleum ether/ethyl acetate = 8/1 as an eluent; yellow oil; 61.8 mg, 80% yield;  $^1\text{H}$  NMR (400 MHz,  $\text{DMSO}-d_6$ )  $\delta$  8.02 (d,  $J = 8.4$  Hz, 1H), 7.93 (d,  $J = 8.4$  Hz, 1H), 7.69 (t,  $J = 7.4$  Hz, 1H), 7.55 (t,  $J = 7.6$  Hz, 1H), 7.47 (s, 1H), 4.25 (br s, 1H), 3.48 – 3.44 (m, 1H), 2.67 (s, 3H), 1.90 – 1.82 (m, 1H), 1.72 – 1.65 (m, 1H), 1.37 (s, 6H), 1.13 – 1.01 (m, 2H), 0.96 (d,  $J = 6.0$  Hz, 3H).  $^{13}\text{C}$  NMR (101 MHz,  $\text{CDCl}_3$ )  $\delta$  167.8, 147.0, 144.4, 129.5, 129.2, 126.7, 125.8, 123.6, 119.8, 68.1, 40.9, 37.2, 34.7, 28.9, 28.6, 23.5, 19.2. HRMS: Calcd for  $\text{C}_{17}\text{H}_{24}\text{NO}$  [ $\text{M}+\text{H}^+$ ]: 258.1852, Found: 258.1844

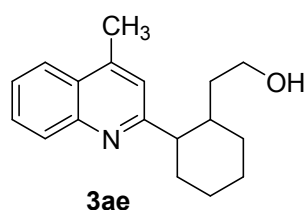

**2-(2-(4-Methylquinolin-2-yl)cyclohexyl)ethan-1-ol (3ae)**: petroleum ether/ethyl acetate = 2/1 as an eluent; yellow oil; 68.7 mg, 85% yield;  $^1\text{H NMR}$  (400 MHz,  $\text{CDCl}_3$ )  $\delta$  8.03 (d,  $J = 8.4$  Hz, 1H), 7.94 (dd,  $J = 8.2, 1.4$  Hz, 1H), 7.67 (ddd,  $J = 8.4, 6.8, 1.5$  Hz, 1H), 7.51 (ddd,  $J = 8.2, 6.8, 1.3$  Hz, 1H), 7.15 (s, 1H), 3.57 – 3.47 (m, 2H), 2.73 – 2.69 (m, 1H), 2.68 (s, 3H), 2.52 (br s, 1H), 2.15 – 2.06 (m, 1H), 1.99 – 1.93 (m, 2H), 1.85 – 1.82 (m, 2H), 1.57 – 1.47 (m, 1H), 1.46 – 1.31 (m, 4H), 1.24 – 1.17 (m, 1H).  $^{13}\text{C NMR}$  (101 MHz,  $\text{CDCl}_3$ )  $\delta$  165.7, 147.2, 145.1, 129.5, 129.1, 127.1, 125.8, 123.8, 121.6, 60.7, 52.6, 37.8, 37.5, 35.0, 33.0, 26.7, 26.4, 19.0. **HRMS**: Calcd for  $\text{C}_{18}\text{H}_{24}\text{NO}$   $[\text{M}+\text{H}^+]$ : 270.1852, Found: 270.1845

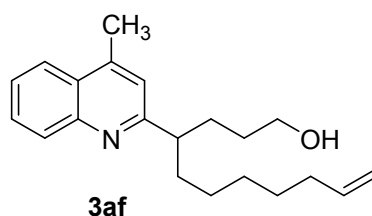

**4-(4-Methylquinolin-2-yl)undec-10-en-1-ol (3af)**: petroleum ether/ethyl acetate = 2/1 as an eluent; yellow oil; 33.6 mg, 36% yield;  $^1\text{H NMR}$  (400 MHz,  $\text{CDCl}_3$ )  $\delta$  8.06 (d,  $J = 8.4$  Hz, 1H), 7.95 (dd,  $J = 8.4, 1.6$  Hz, 1H), 7.67 (ddd,  $J = 8.4, 6.8, 1.5$  Hz, 1H), 7.51 (ddd,  $J = 8.2, 6.8, 1.3$  Hz, 1H), 7.11 (s, 1H), 5.80 – 5.70 (m, 1H), 4.96 – 4.86 (m, 2H), 3.65 – 3.53 (m, 2H), 3.00 – 2.92 (m, 1H), 2.69 (s, 3H), 2.30 (br s, 1H), 2.00 – 1.94 (m, 2H), 1.90 – 1.80 (m, 2H), 1.79 – 1.67 (m, 2H), 1.58 – 1.51 (m, 1H), 1.44 – 1.37 (m, 1H), 1.33 – 1.27 (m, 6H).  $^{13}\text{C NMR}$  (101 MHz,  $\text{CDCl}_3$ )  $\delta$  165.5, 147.4, 144.7, 139.2, 129.4, 129.2, 127.2, 125.7, 123.7, 120.8, 114.3, 62.9, 48.2, 35.9, 33.8, 31.9, 30.8, 29.4, 28.9, 27.6, 19.0. **HRMS**: Calcd for  $\text{C}_{21}\text{H}_{30}\text{NO}$   $[\text{M}+\text{H}^+]$ : 312.2322, Found: 312.2309

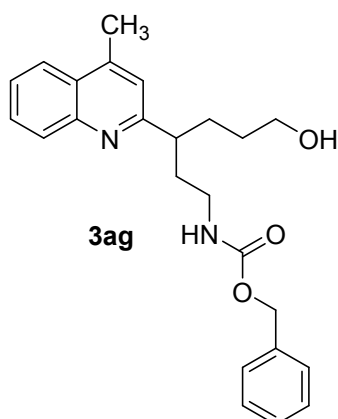

**Benzyl (6-hydroxy-3-(4-methylquinolin-2-yl)hexyl)carbamate (3ag):** petroleum ether/ethyl acetate = 1/1 as an eluent; yellow oil; 69.5 mg, 59% yield;  $^1\text{H NMR}$  (400 MHz,  $\text{CDCl}_3$ )  $\delta$  8.03 (t,  $J = 8.4$  Hz, 1H), 7.94 (t,  $J = 8.2$  Hz, 1H), 7.69 – 7.63 (m, 1H), 7.55 – 7.49 (m, 1H), 7.37 – 7.247 (m, 5H), 7.12 (d,  $J = 7.6$  Hz, 1H), 5.40 (s, 1H), 5.04 (d,  $J = 7.6$  Hz, 2H), 3.62 – 3.55 (m, 2H), 3.25 – 3.18 (m, 1H), 3.07 – 2.96 (m, 2H), 2.66 (s, 3H), 2.40 (br s, 1H), 2.02 – 1.96 (m, 2H), 1.90 – 1.82 (m, 2H), 1.58 – 1.49 (m, 1H) 1.46 – 1.37 (m, 1H).  $^{13}\text{C NMR}$  (101 MHz,  $\text{CDCl}_3$ )  $\delta$  164.3, 156.6, 147.4, 145.2, 136.8, 129.4, 129.3, 128.6, 128.1, 127.2, 126.0, 123.8, 120.8, 66.6, 62.5, 45.5, 39.2, 35.5, 31.5, 30.6, 19.0. **HRMS:** Calcd for  $\text{C}_{24}\text{H}_{29}\text{N}_2\text{O}_3$  [ $\text{M}+\text{H}^+$ ]: 393.2173, Found: 393.2166

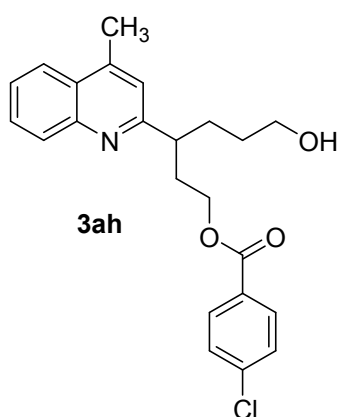

**6-Hydroxy-3-(4-methylquinolin-2-yl)hexyl 4-chlorobenzoate (3ah):** petroleum ether/ethyl acetate = 2/1 as an eluent; yellow oil; 59.7 mg, 50% yield;  $^1\text{H NMR}$  (400

MHz, CDCl<sub>3</sub>)  $\delta$  8.02 – 8.00 (m, 1H), 7.89 – 7.87 (m, 1H), 7.69 – 7.65 (m, 3H), 7.52 – 7.48 (m, 1H), 7.23 – 7.19 (m, 2H), 7.10 (s, 1H), 4.28 (t,  $J$  = 6.4 Hz, 2H), 3.63 – 3.53 (m, 2H), 3.17 – 3.10 (m, 1H), 2.60 (s, 3H), 2.43 – 2.38 (m, 1H), 2.36 – 2.34 (m, 1H), 2.22 – 2.13 (m, 1H), 2.01 – 1.92 (m, 1H), 1.91 – 1.82 (m, 1H), 1.62 – 1.52 (m, 1H), 1.47 – 1.36 (m, 1H). <sup>13</sup>C NMR (101 MHz, CDCl<sub>3</sub>)  $\delta$  165.7, 164.0, 147.7, 144.9, 139.2, 130.9, 129.5, 129.3, 128.6, 128.6, 127.2, 125.8, 123.7, 121.2, 64.1, 62.7, 45.6, 34.4, 32.1, 30.6, 18.9. **HRMS**: Calcd for C<sub>23</sub>H<sub>25</sub>ClNO<sub>3</sub> [M+H<sup>+</sup>]: 398.1517, Found: 398.1517

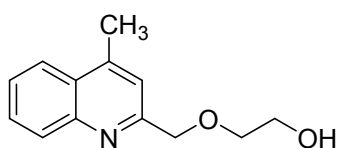

**3ai**

**2-((4-Methylquinolin-2-yl)methoxy)ethan-1-ol (3ai)**: methylene chloride/methanol = 30/1 as an eluent; yellow oil; 29.3 mg, 45% yield; <sup>1</sup>H NMR (400 MHz, CDCl<sub>3</sub>)  $\delta$  8.06 (d,  $J$  = 8.4 Hz, 1H), 7.96 – 7.94 (m, 1H), 7.68 (ddd,  $J$  = 8.4, 6.8, 1.5 Hz, 1H), 7.53 (ddd,  $J$  = 8.2, 6.8, 1.3 Hz, 1H), 7.27 (s, 1H), 4.82 (s, 2H), 3.84 – 3.82 (m, 2H), 3.79 – 3.76 (m, 2H), 3.45 (br s, 1H), 2.68 (s, 3H). <sup>13</sup>C NMR (101 MHz, CDCl<sub>3</sub>)  $\delta$  158.4, 147.2, 145.5, 129.6, 129.3, 127.6, 126.4, 123.8, 120.0, 73.9, 73.2, 61.9, 18.9. **HRMS**: Calcd for C<sub>13</sub>H<sub>16</sub>NO<sub>2</sub> [M+H<sup>+</sup>]: 218.1176, Found: 218.1165

## NMR spectra

### <sup>1</sup>H NMR of 3a

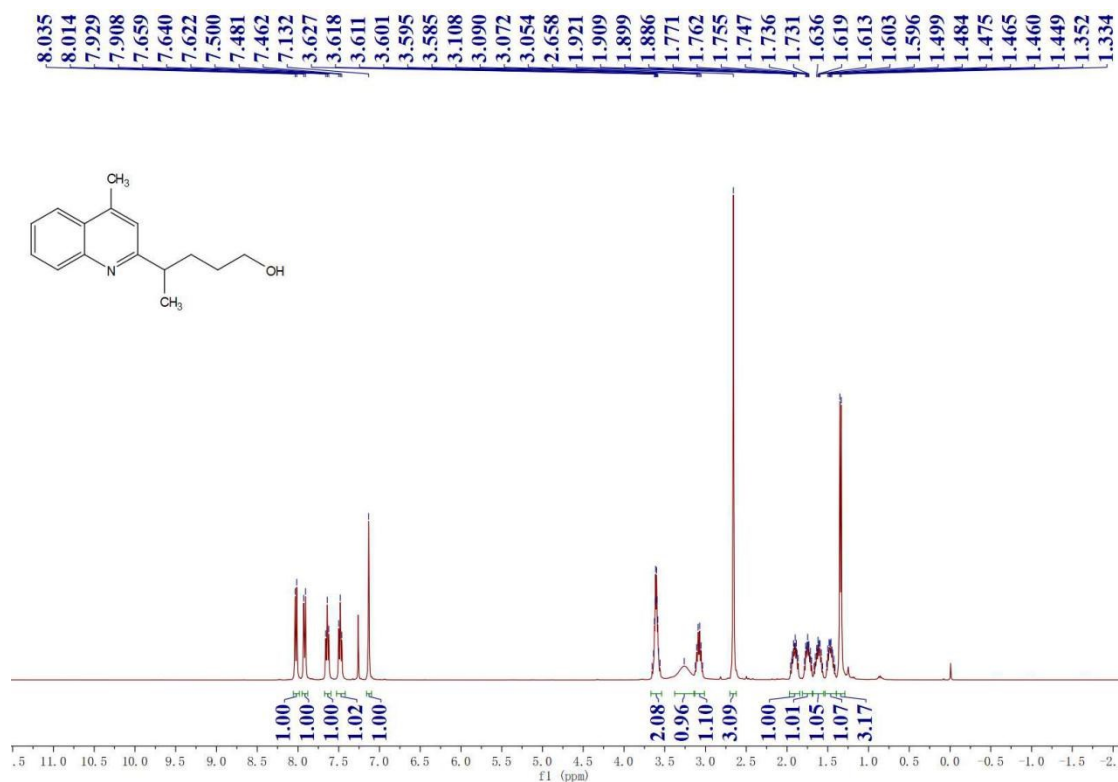

### <sup>13</sup>C NMR of 3a

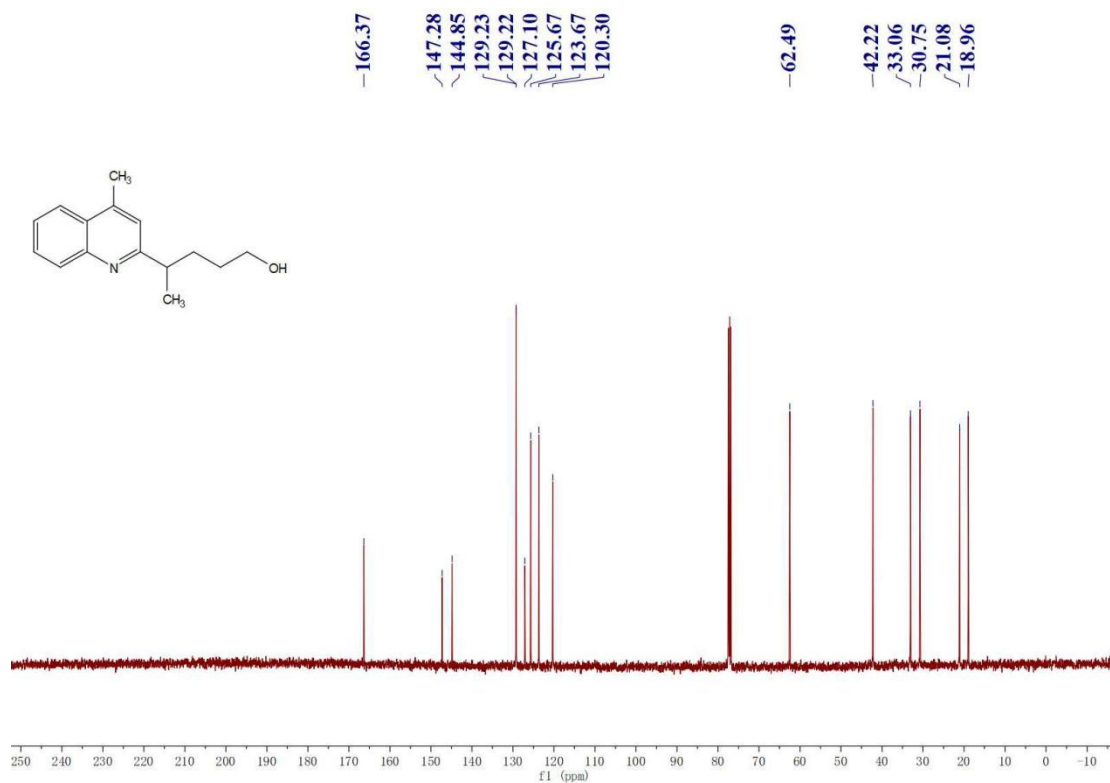

### <sup>1</sup>H NMR of 3b

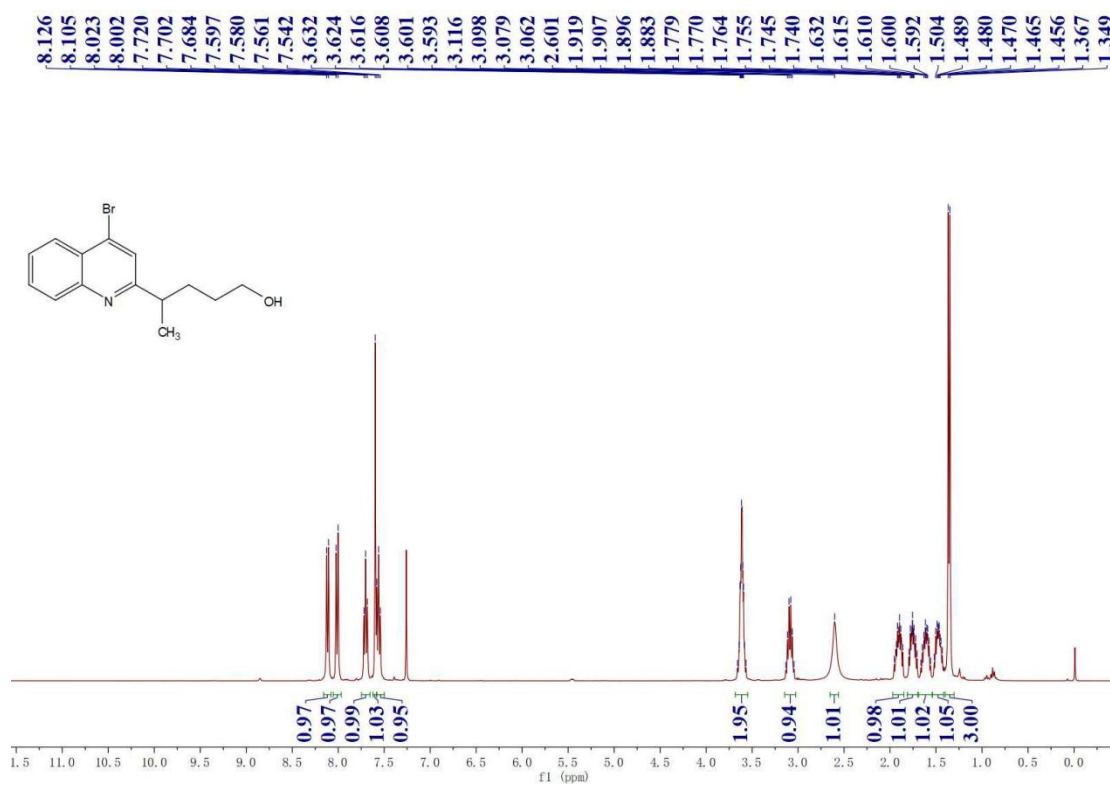

### <sup>13</sup>C NMR of 3b

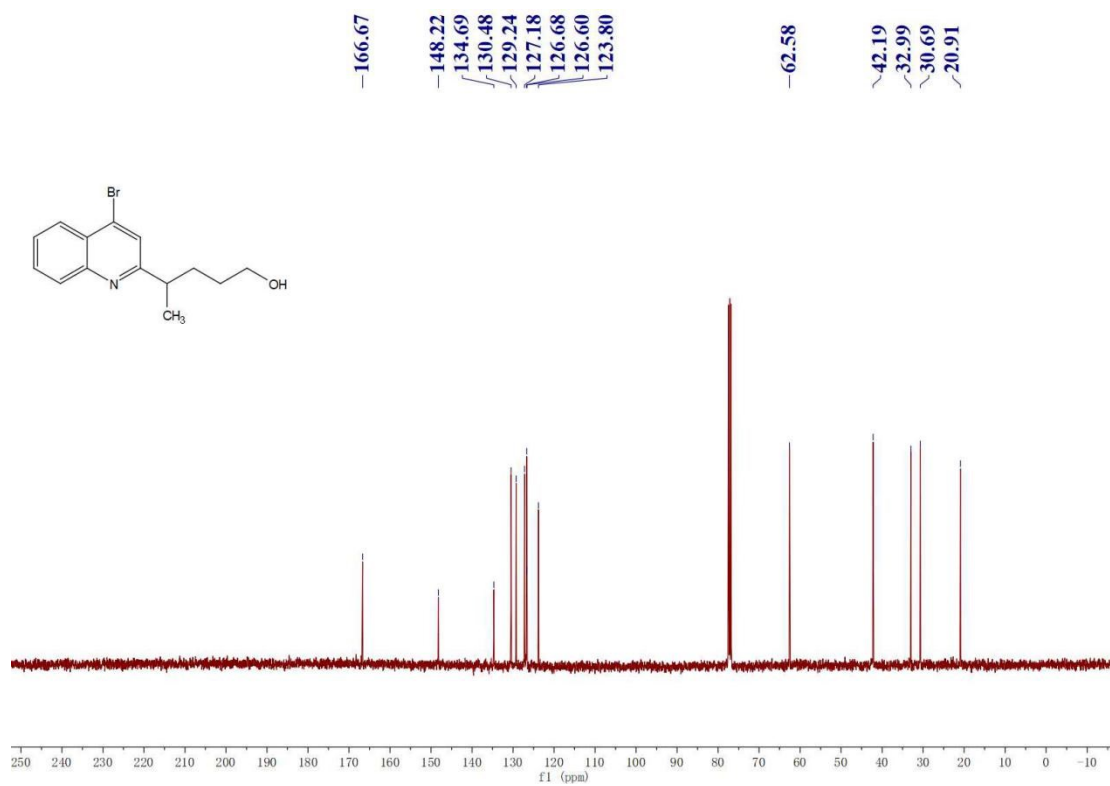

### <sup>1</sup>H NMR of 3c

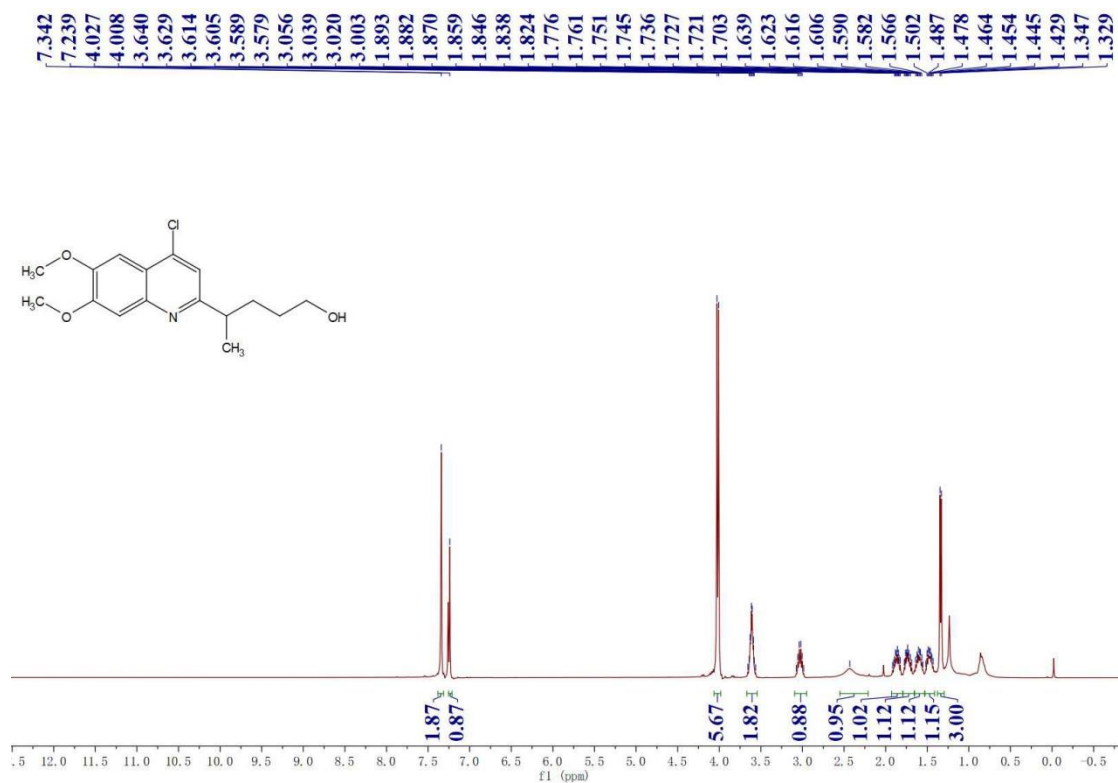

### <sup>13</sup>C NMR of 3c

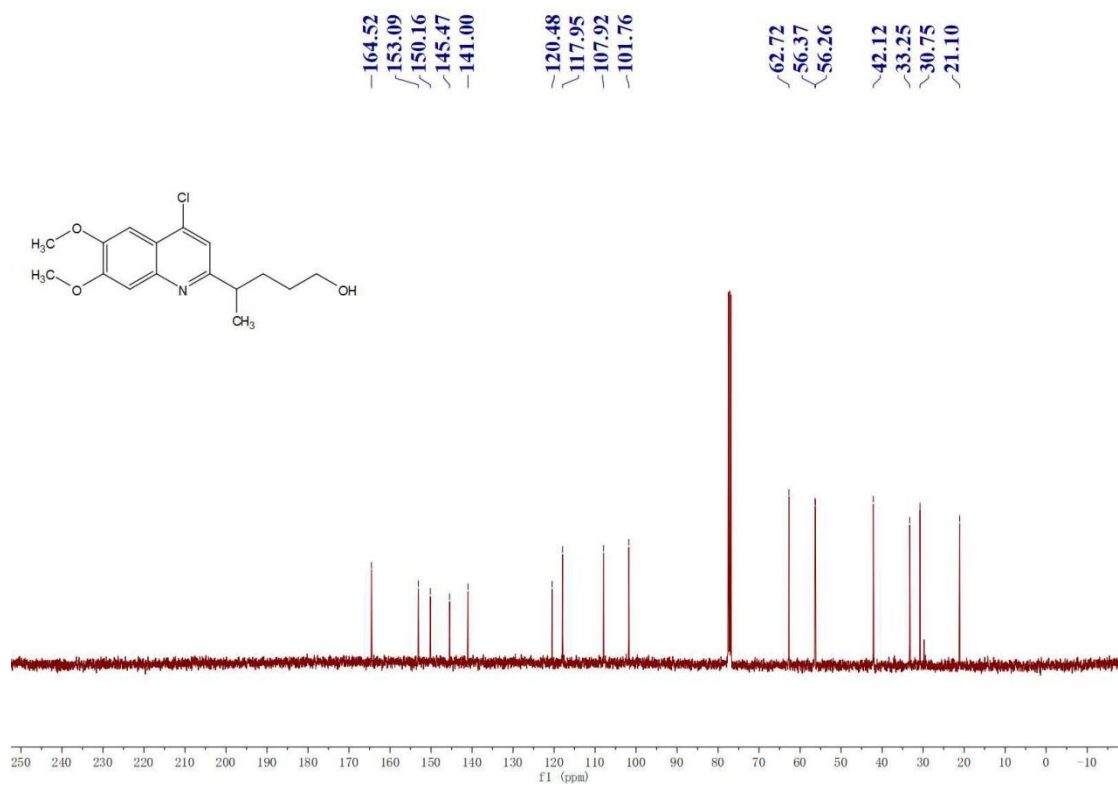



### <sup>1</sup>H NMR of 3d

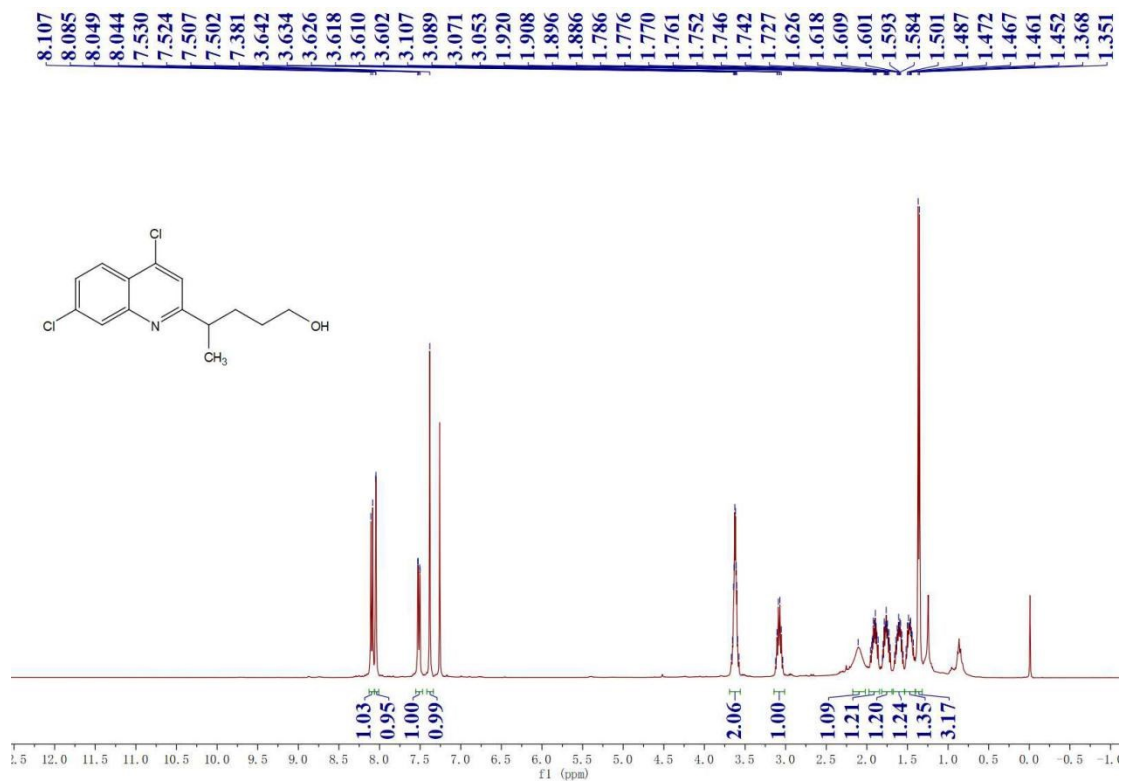

### <sup>13</sup>C NMR of 3d

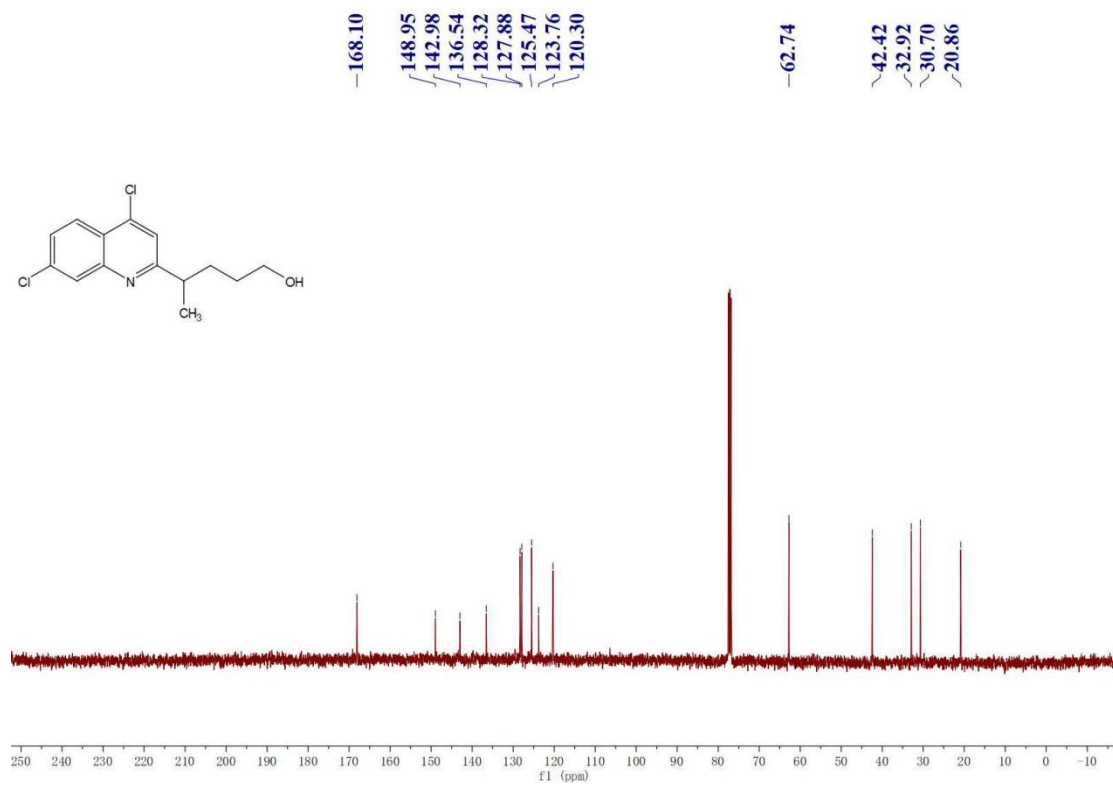

<sup>1</sup>H NMR of 3e

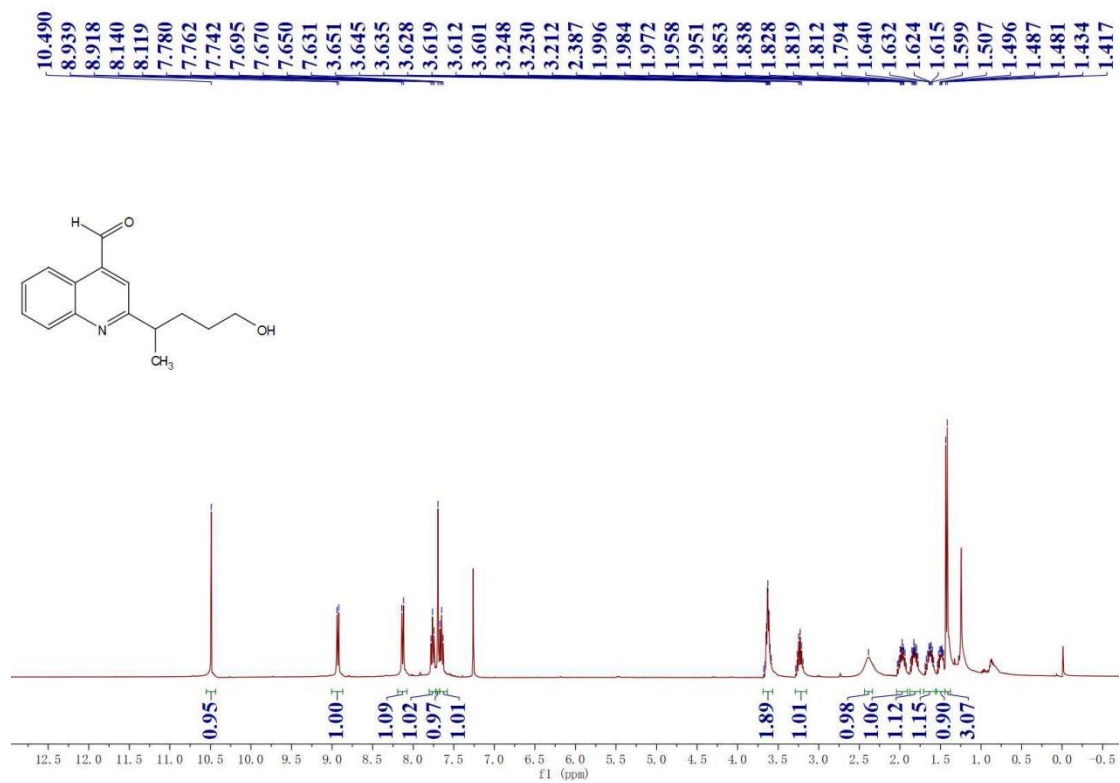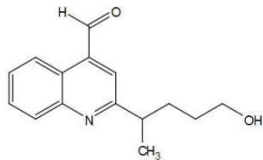

### <sup>13</sup>C NMR of 3e

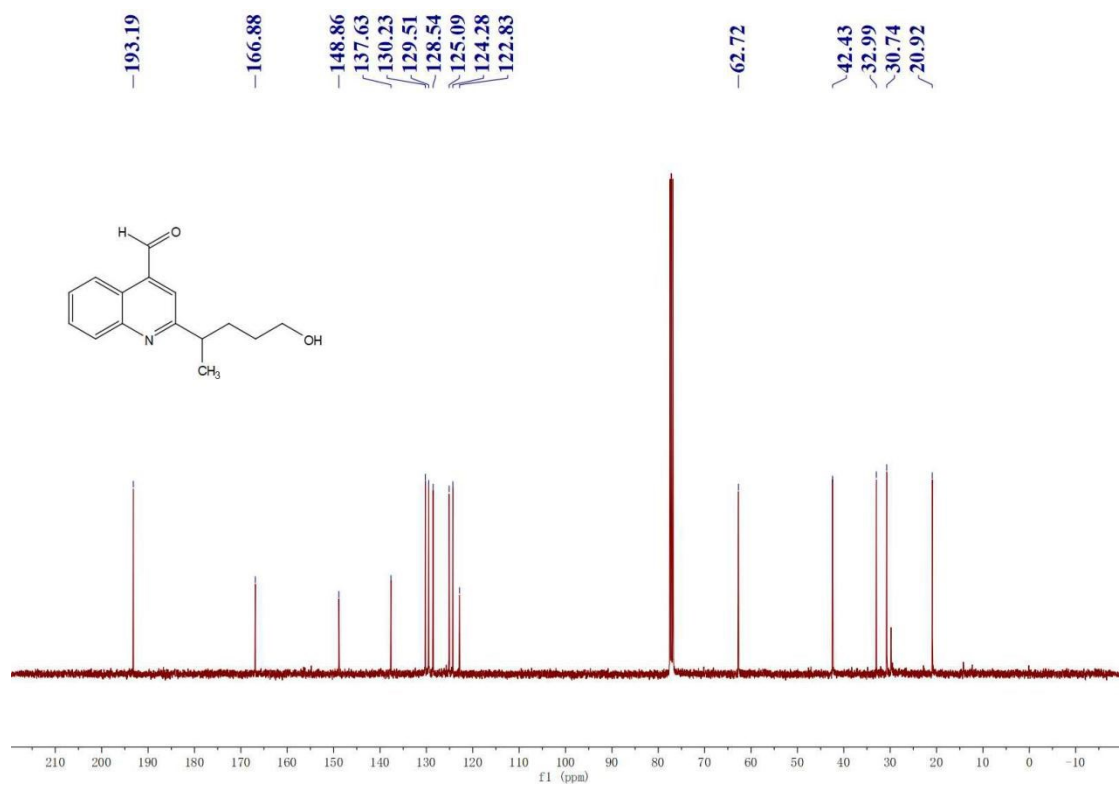

### <sup>1</sup>H NMR of 3f

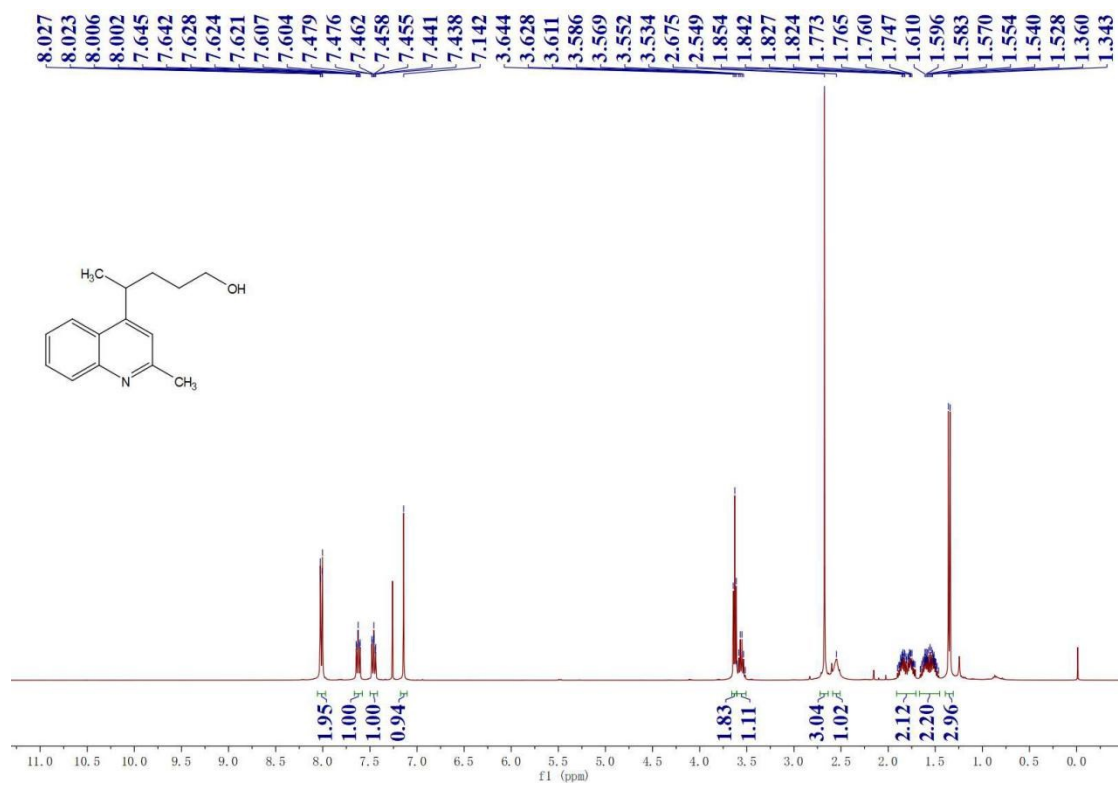

### <sup>13</sup>C NMR of 3f

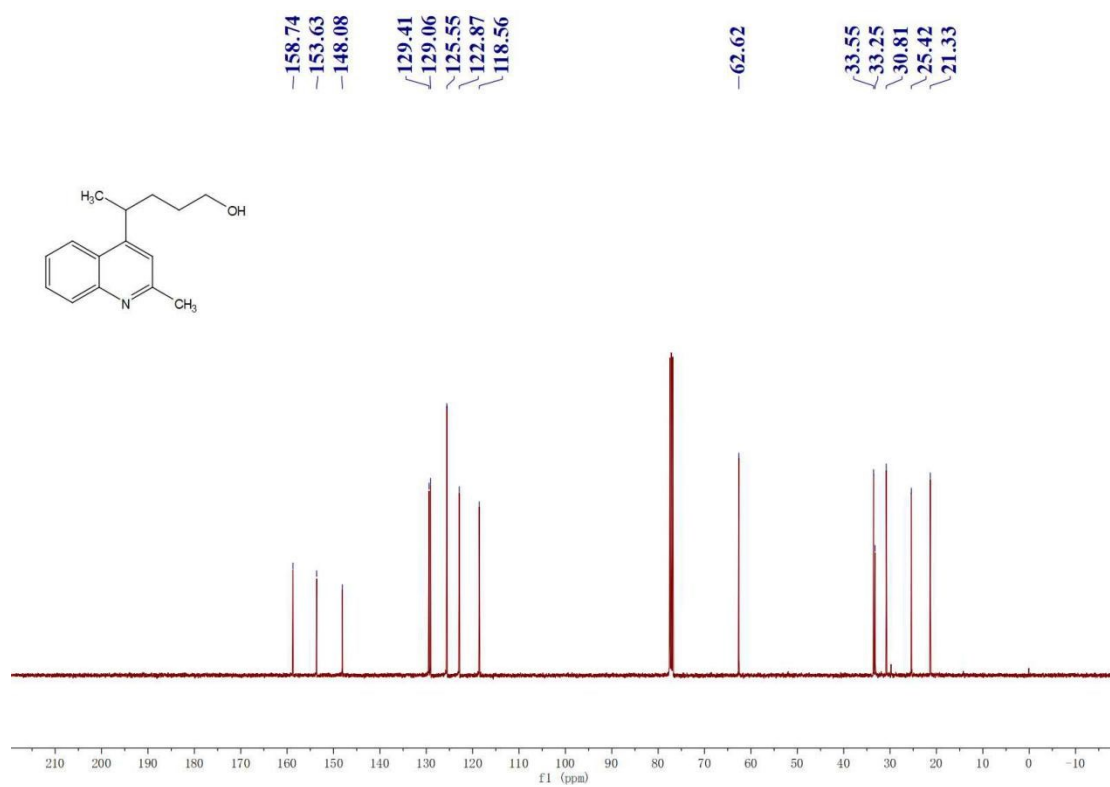

<sup>1</sup>H NMR of 3g

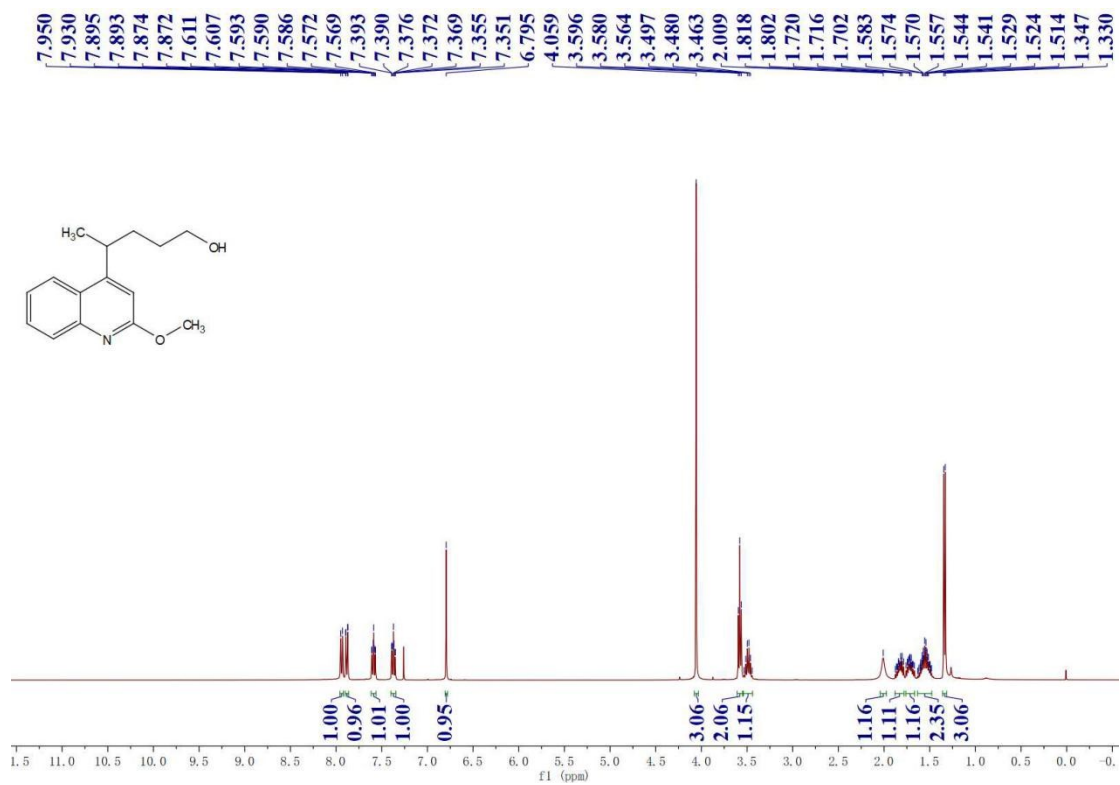

**<sup>13</sup>C NMR of 3g**

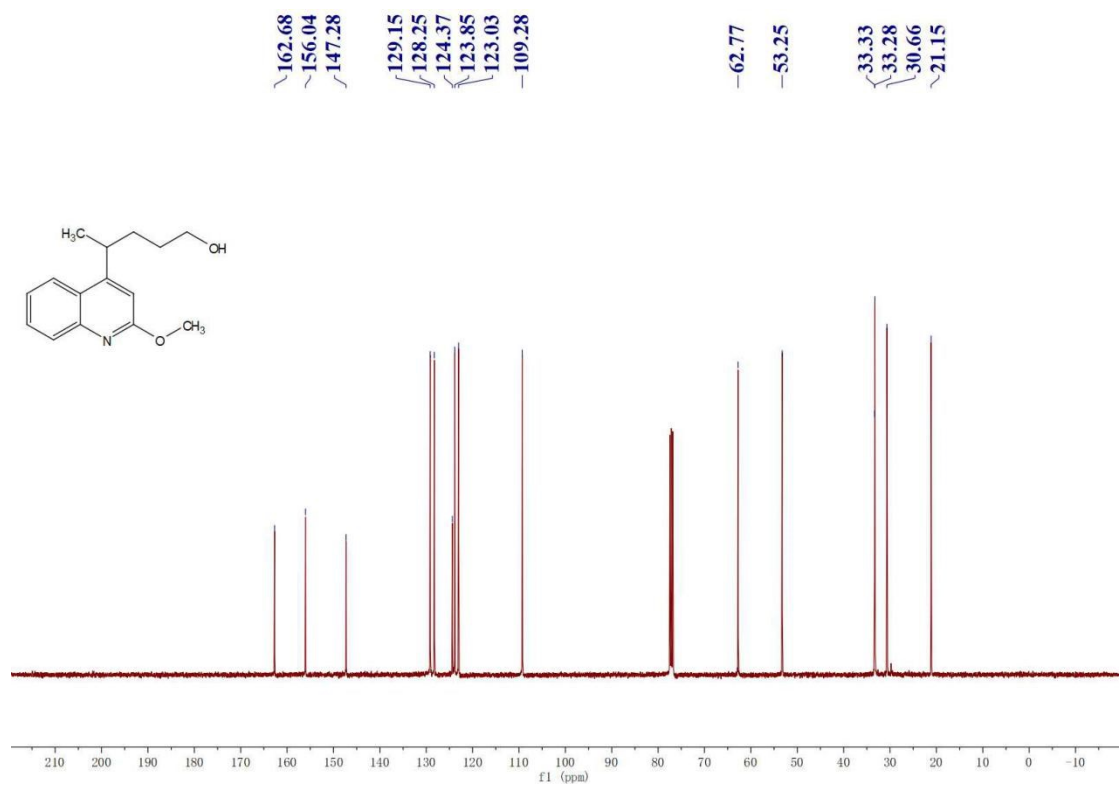

### <sup>1</sup>H NMR of 3h

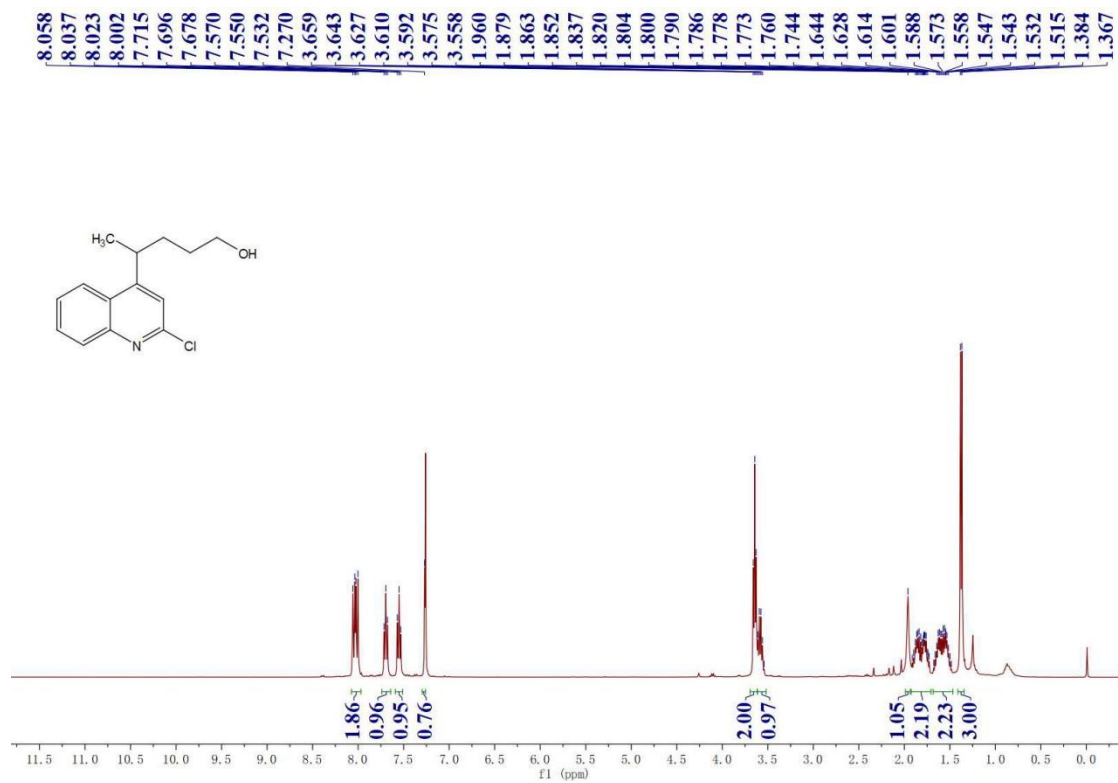

### <sup>13</sup>C NMR of 3h

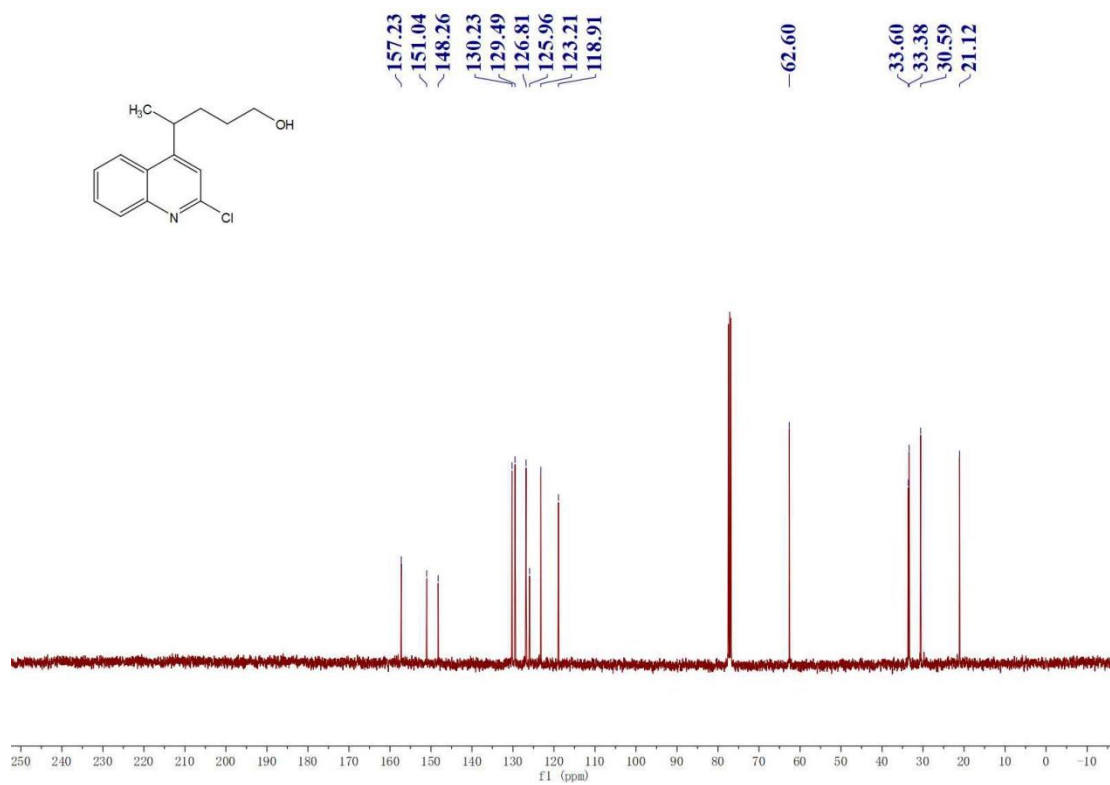

**<sup>1</sup>H NMR of 3i**



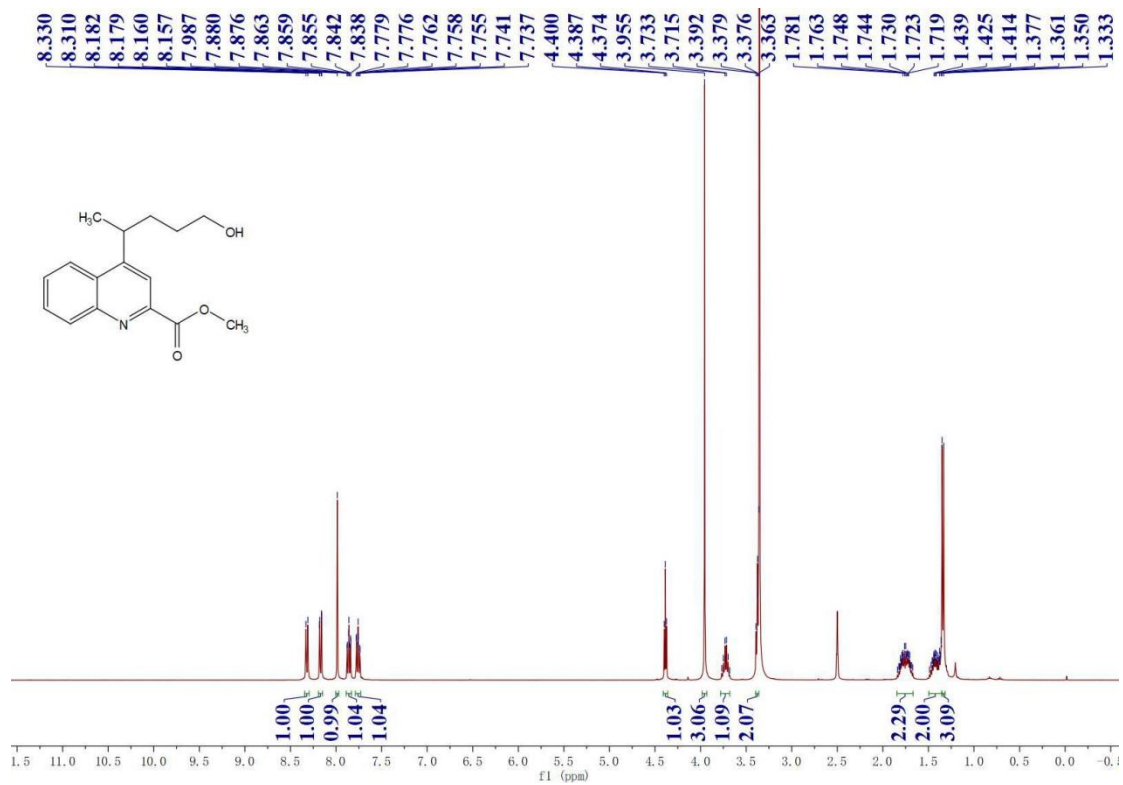

### <sup>13</sup>C NMR of 3i

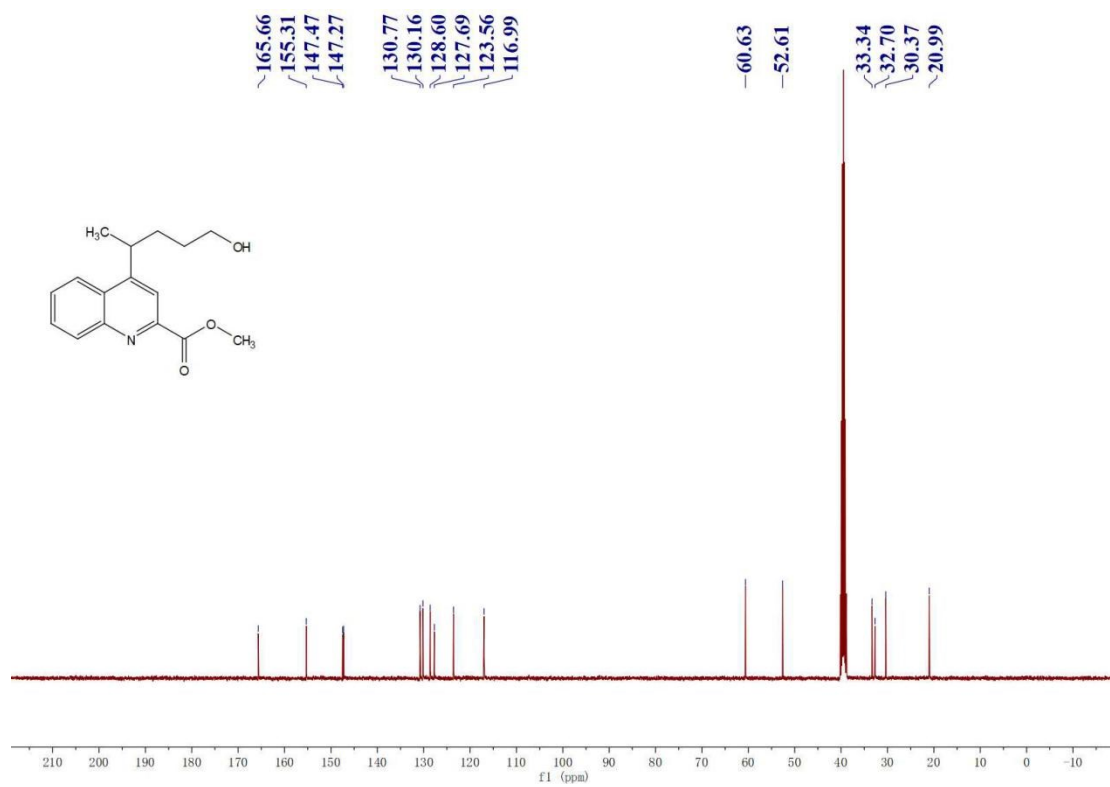

### <sup>1</sup>H NMR of 3j-o

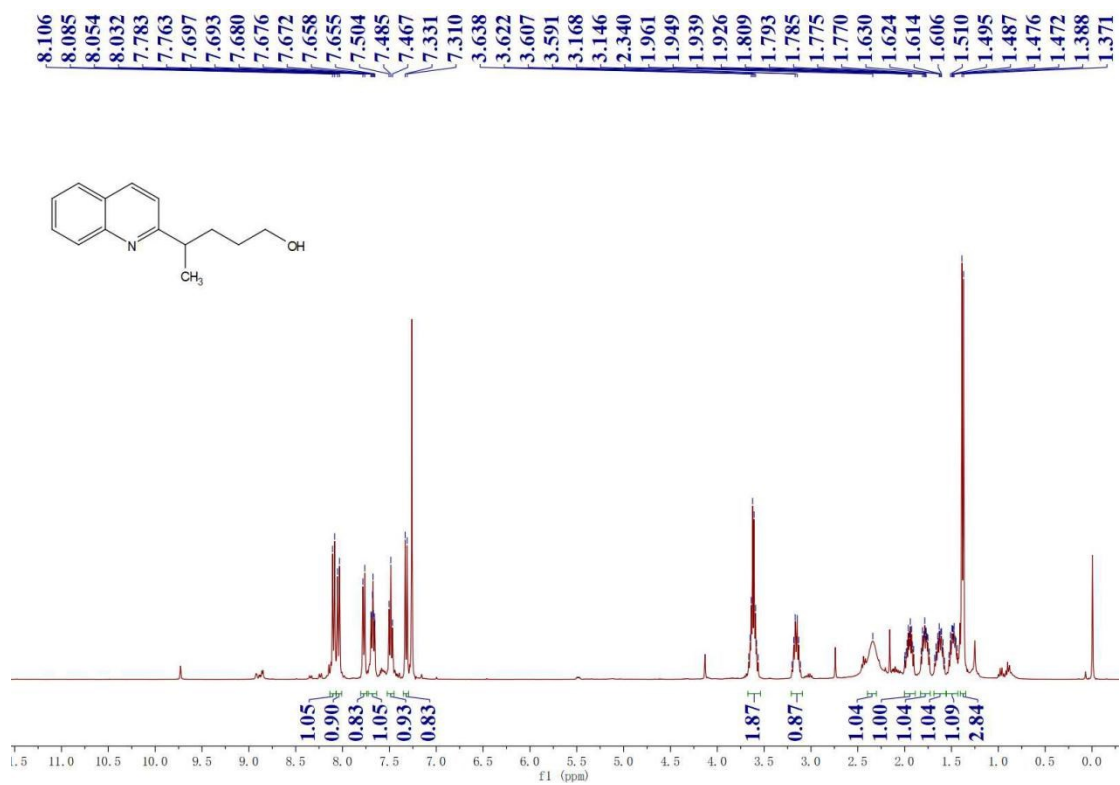

### <sup>13</sup>C NMR of 3j-o

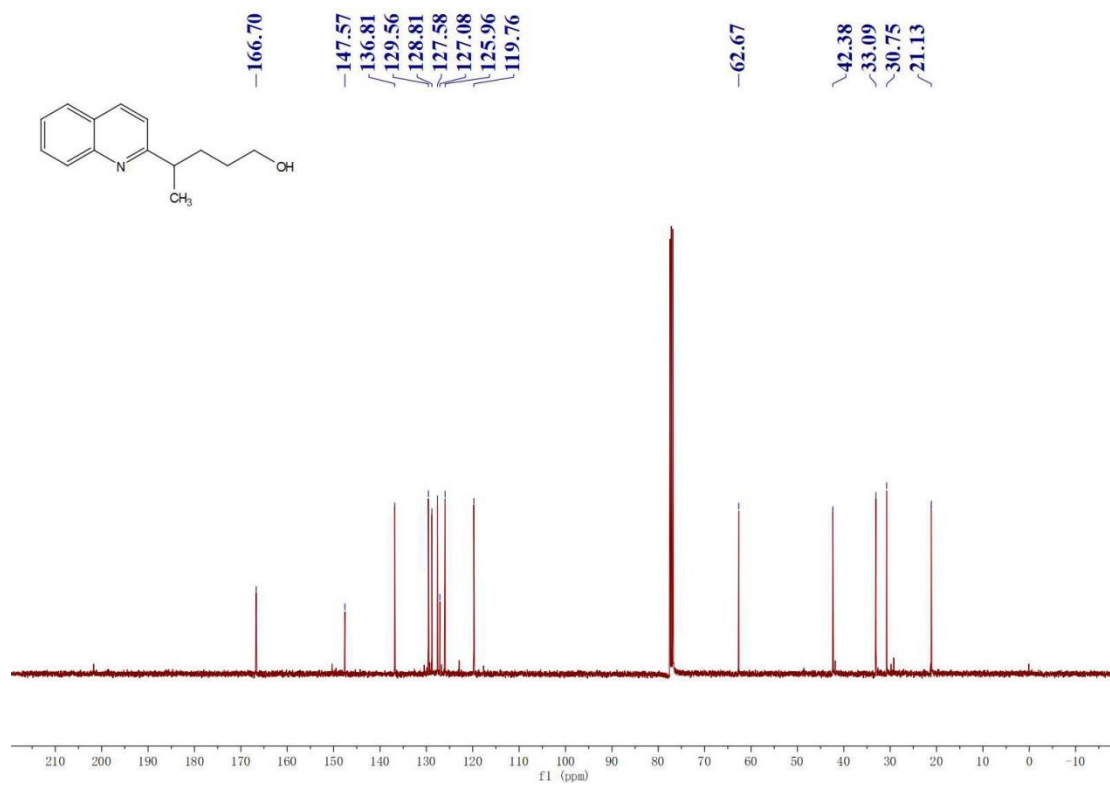

**<sup>1</sup>H NMR of 3j-p**

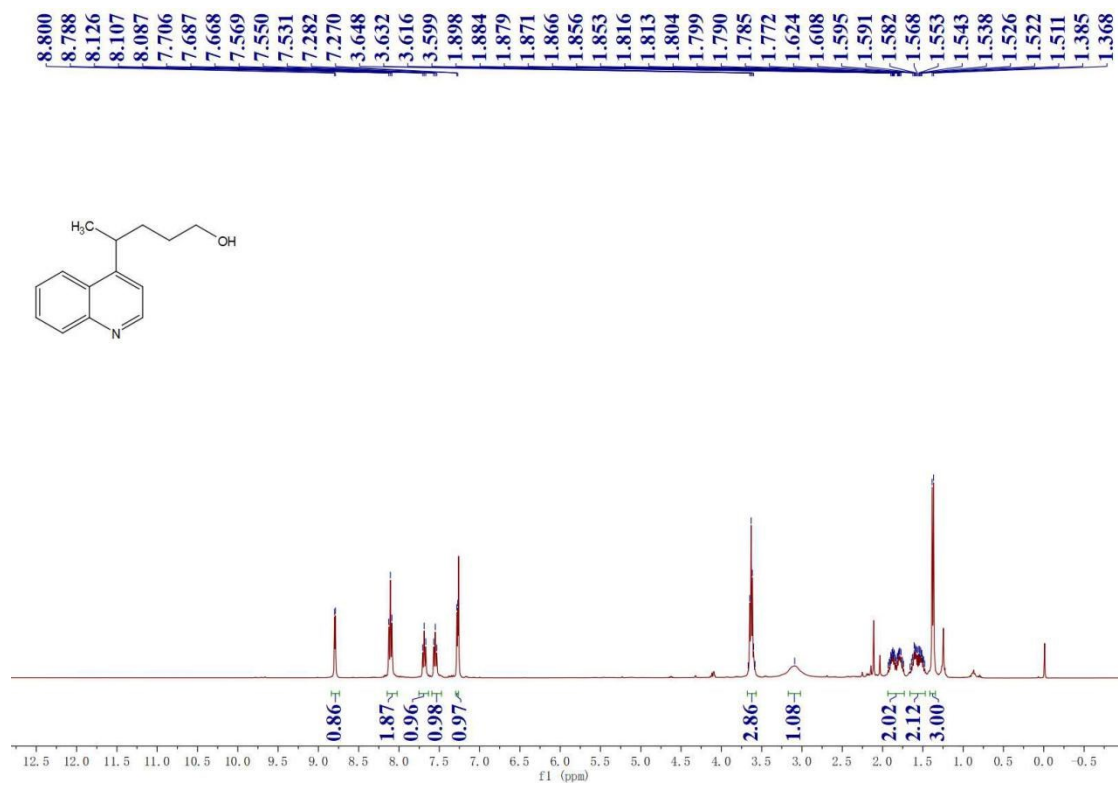

**<sup>13</sup>C NMR of 3j-p**

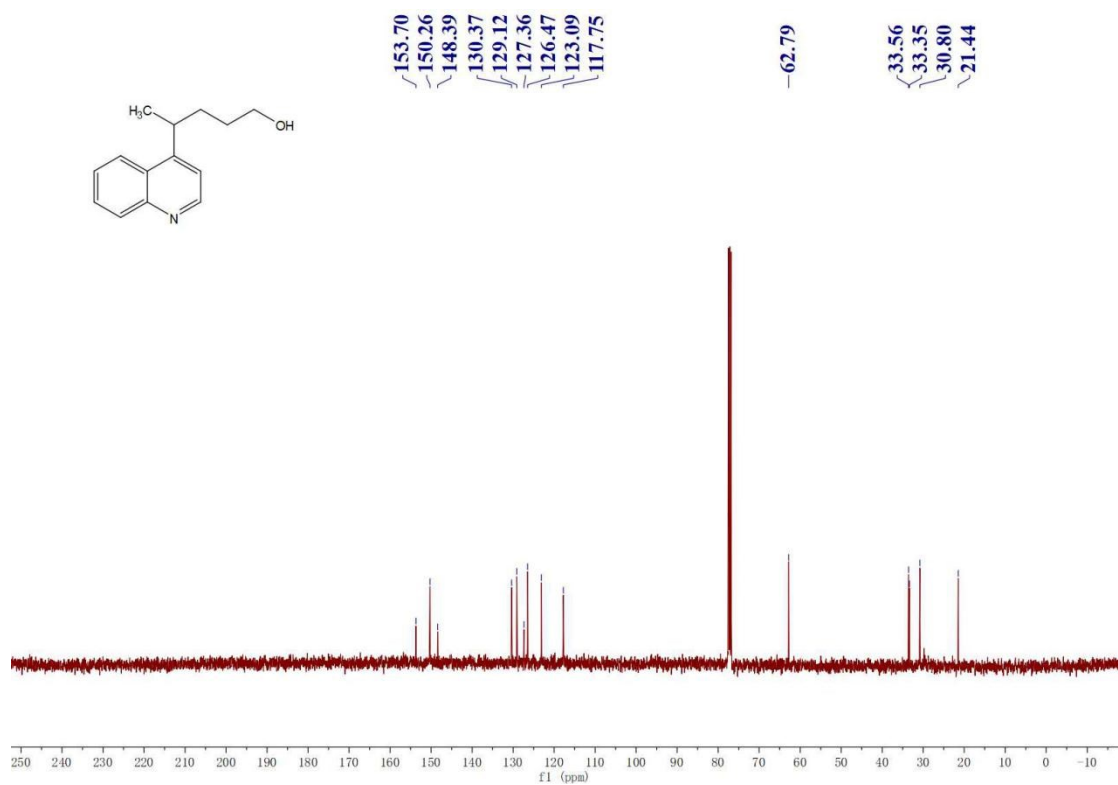

### <sup>1</sup>H NMR of 3k

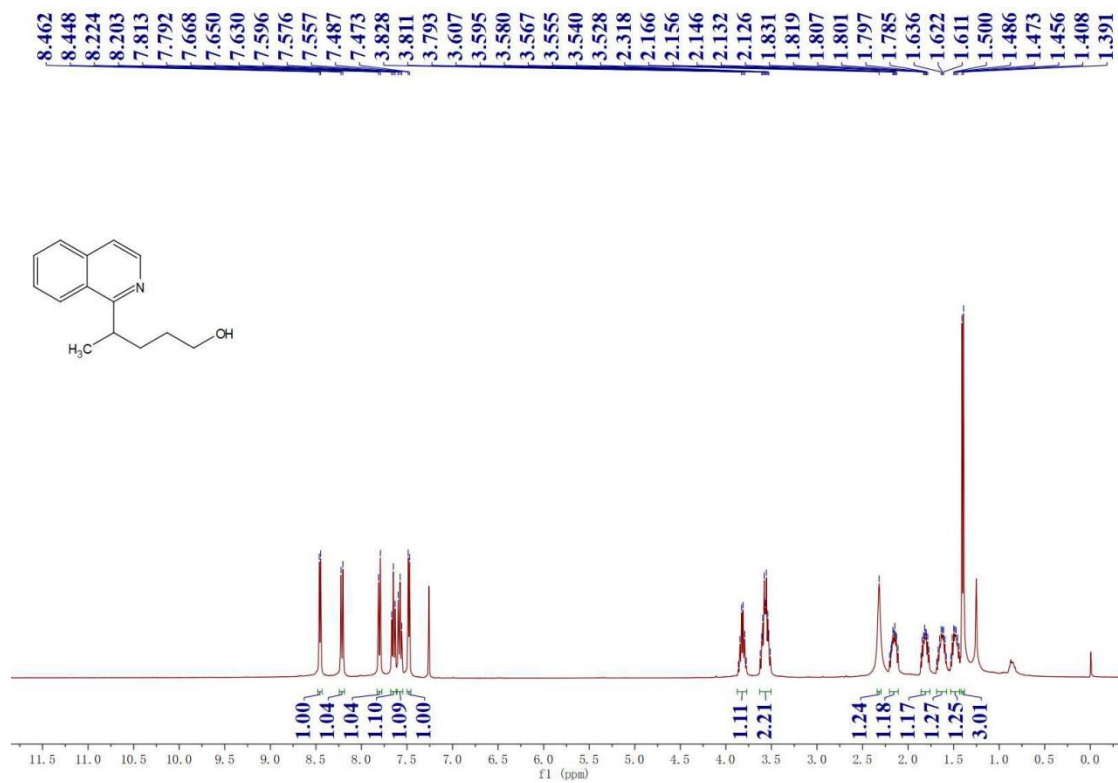

### <sup>13</sup>C NMR of 3k

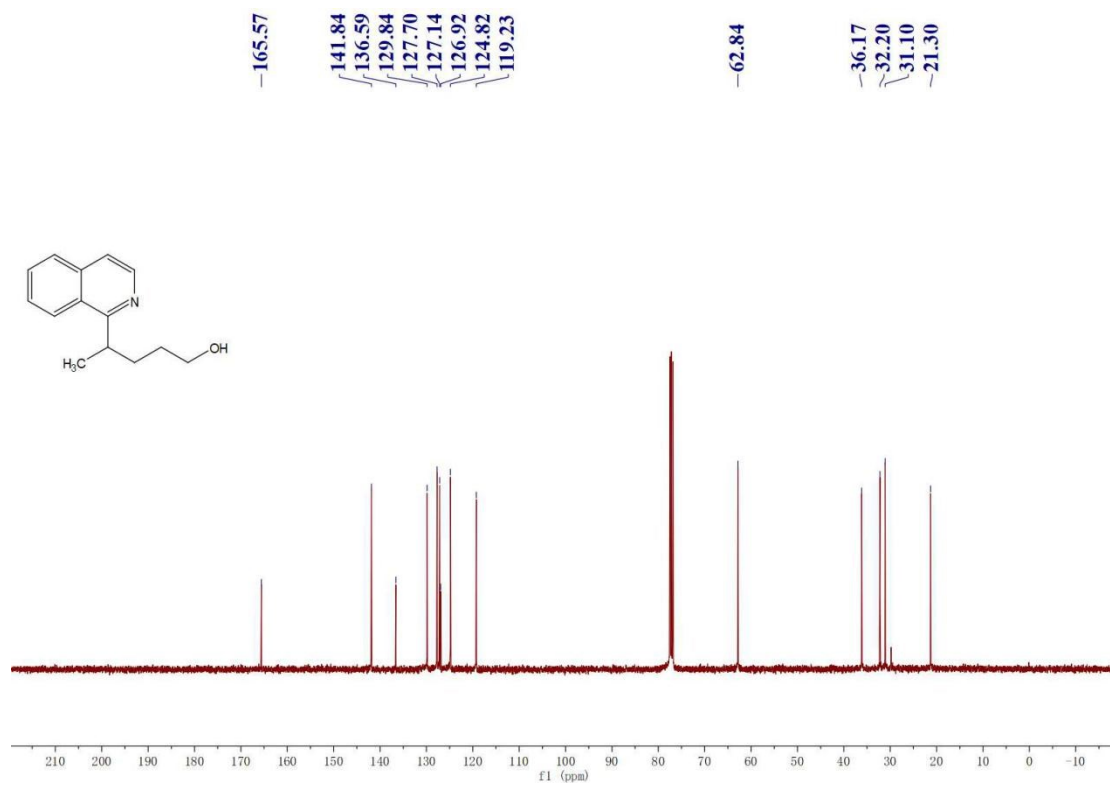

**<sup>1</sup>H NMR of 31**

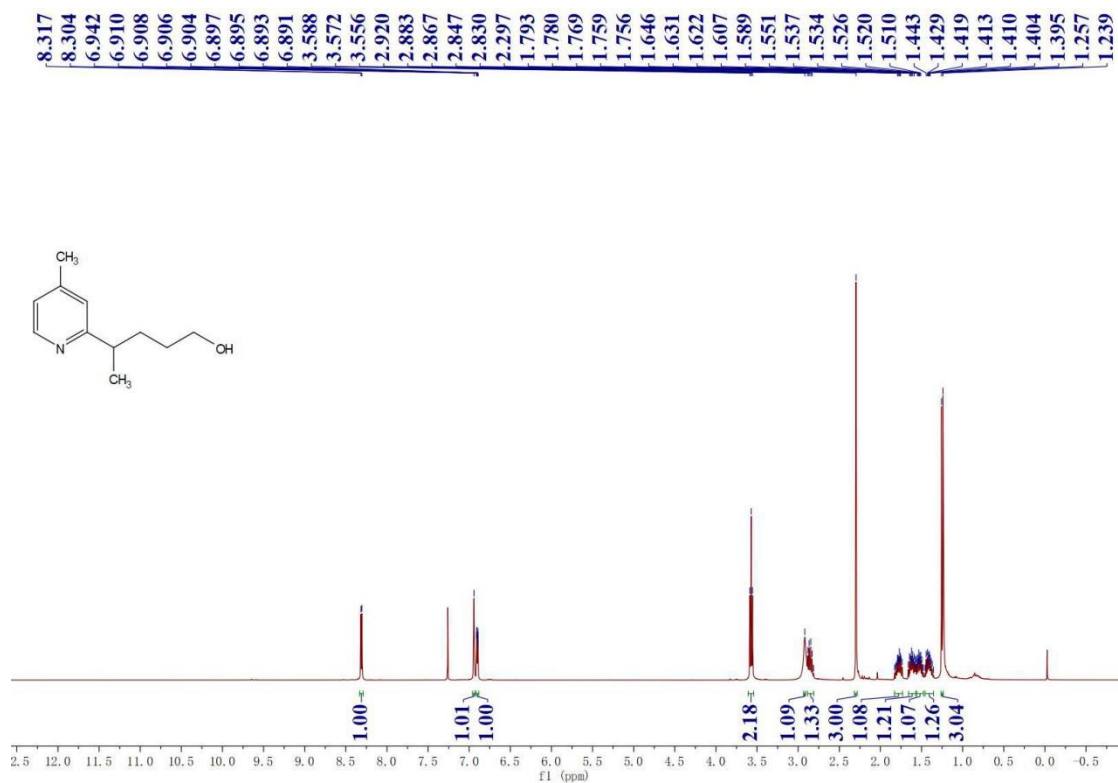

**<sup>13</sup>C NMR of 31**

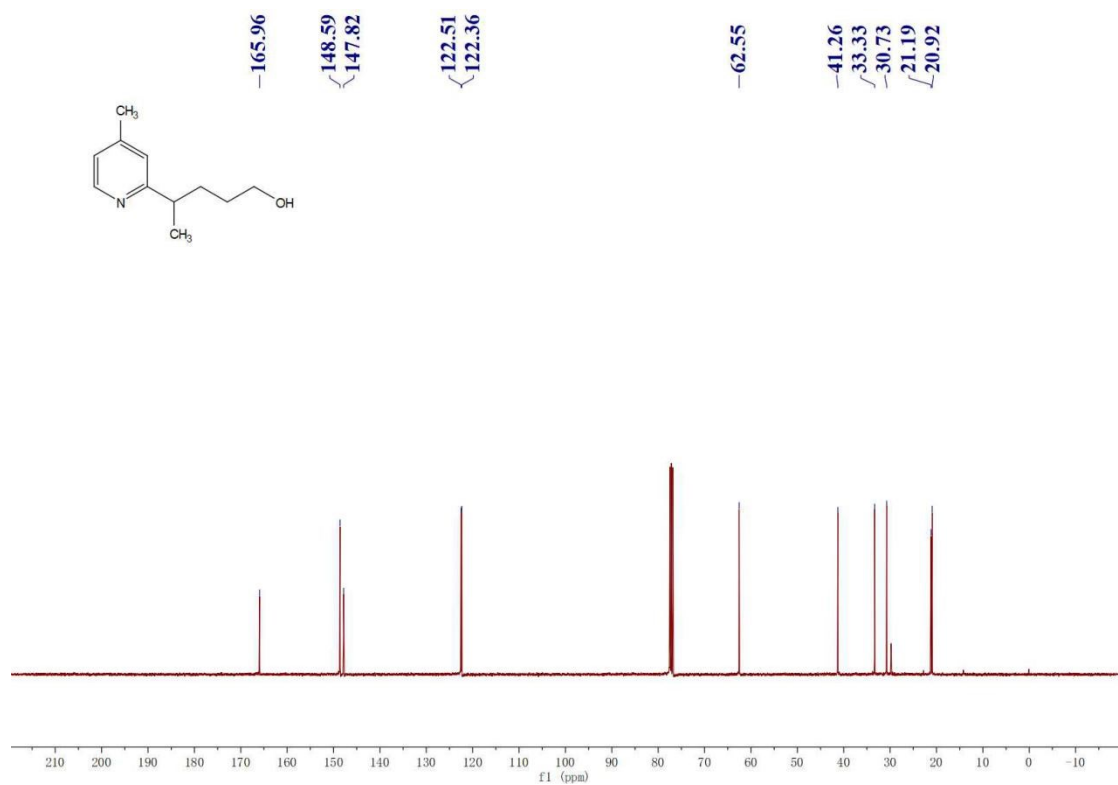

### <sup>1</sup>H NMR of 3m

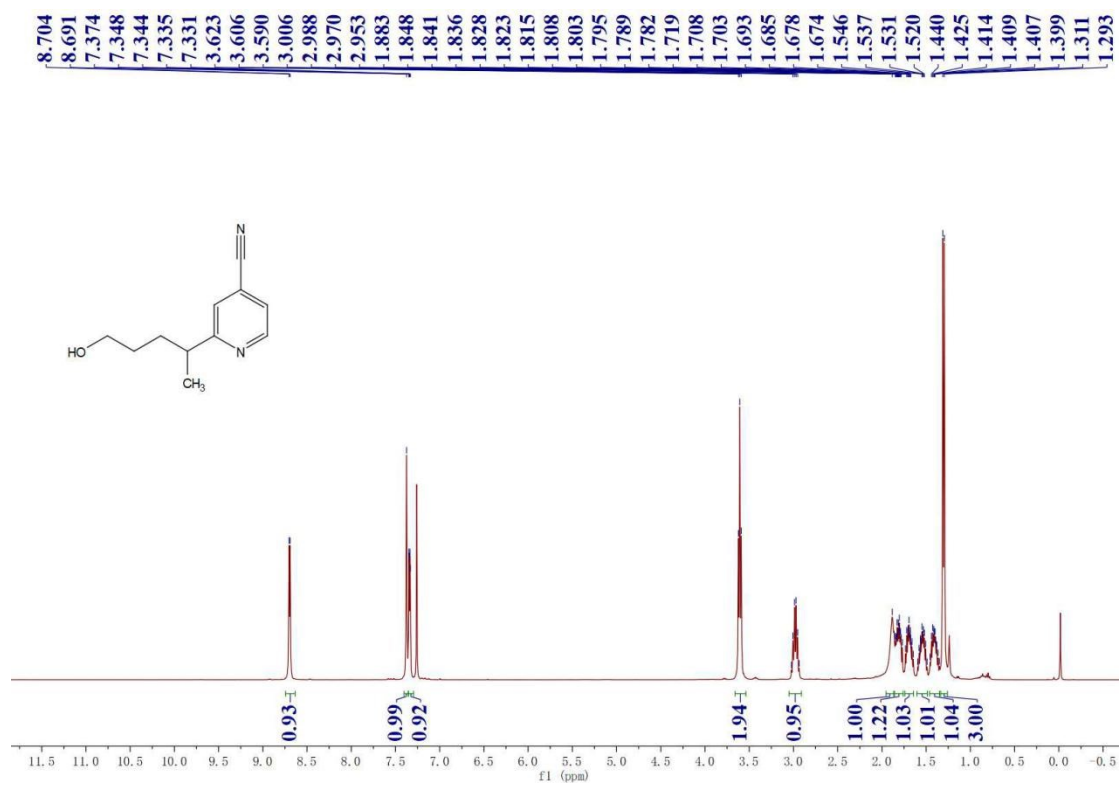

### <sup>13</sup>C NMR of 3m



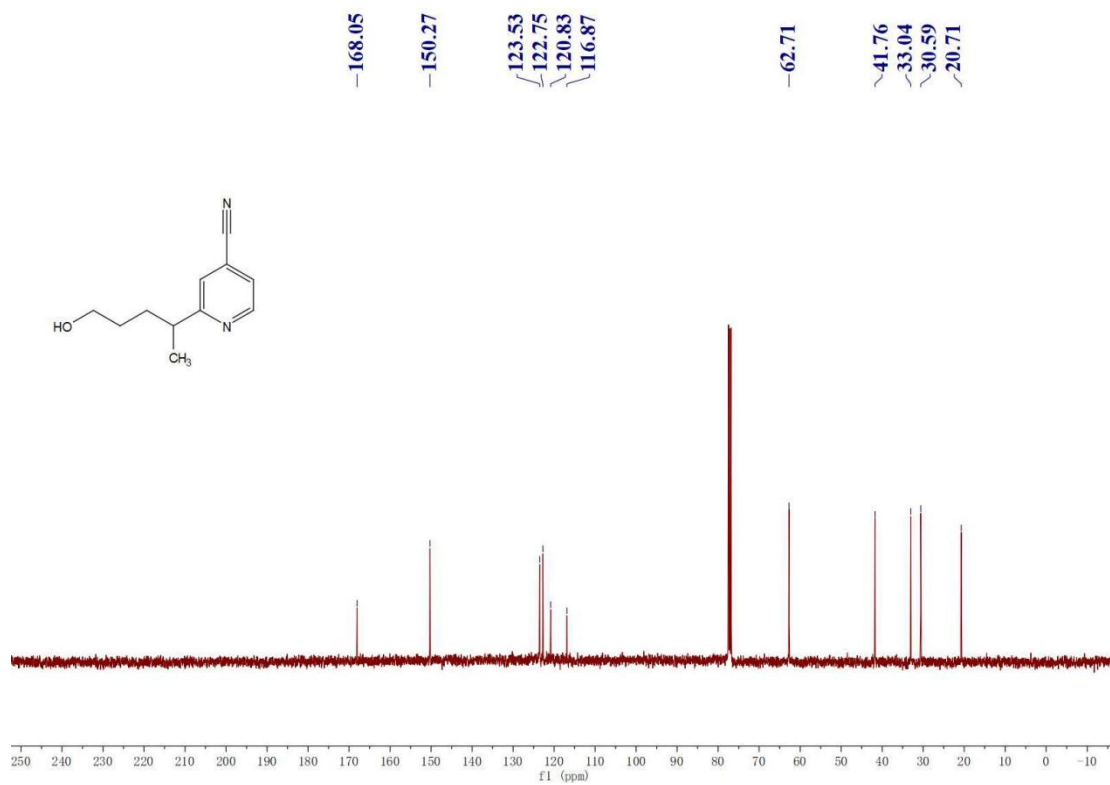

<sup>1</sup>H NMR of 3n

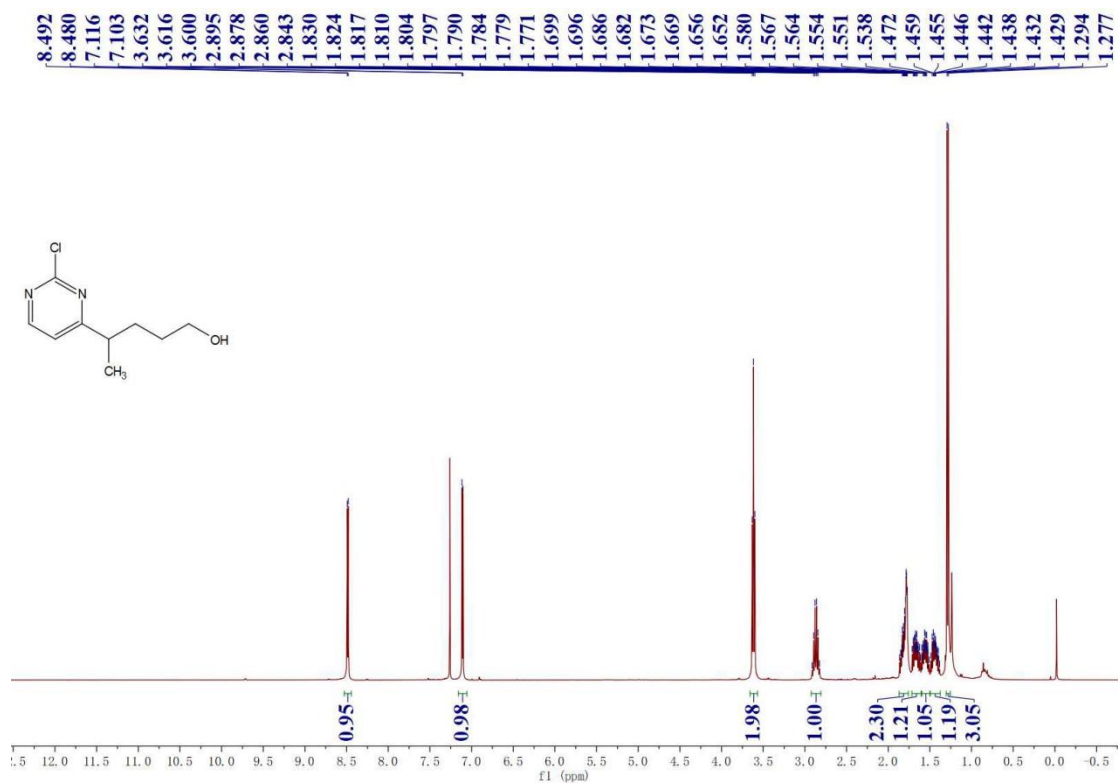

**<sup>13</sup>C NMR of 3n**

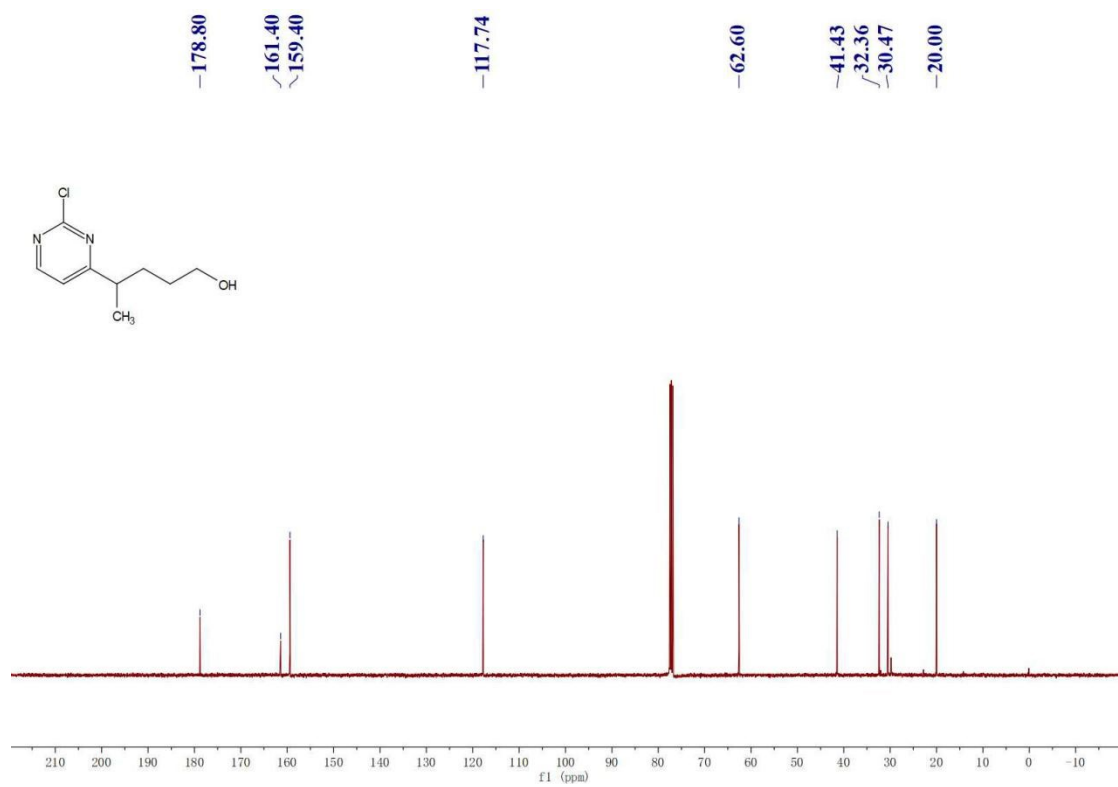

### <sup>1</sup>H NMR of 3o

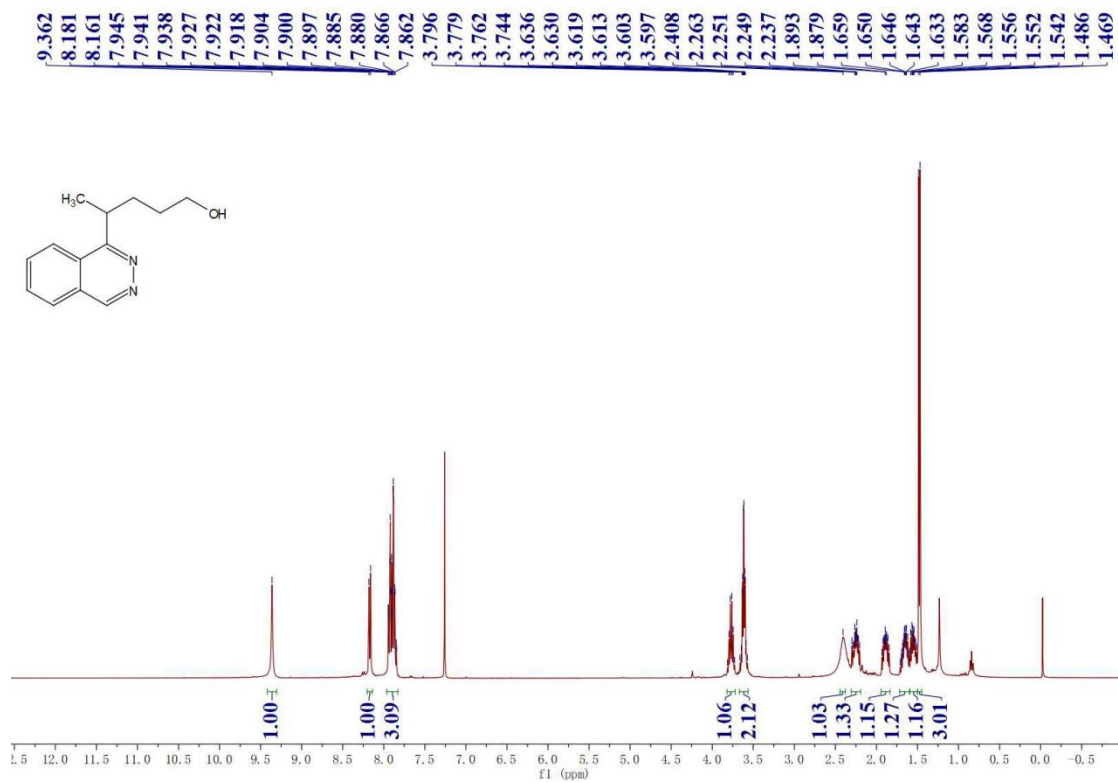

### <sup>13</sup>C NMR of 3o

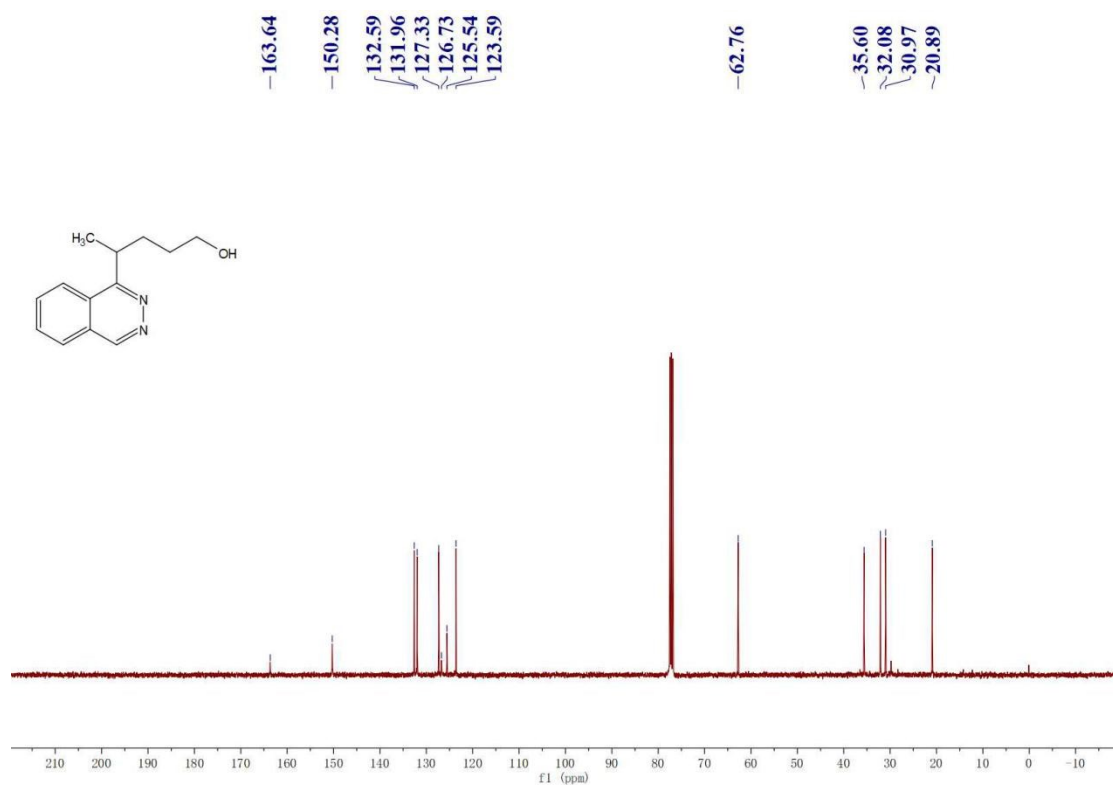

**<sup>1</sup>H NMR of 3p**

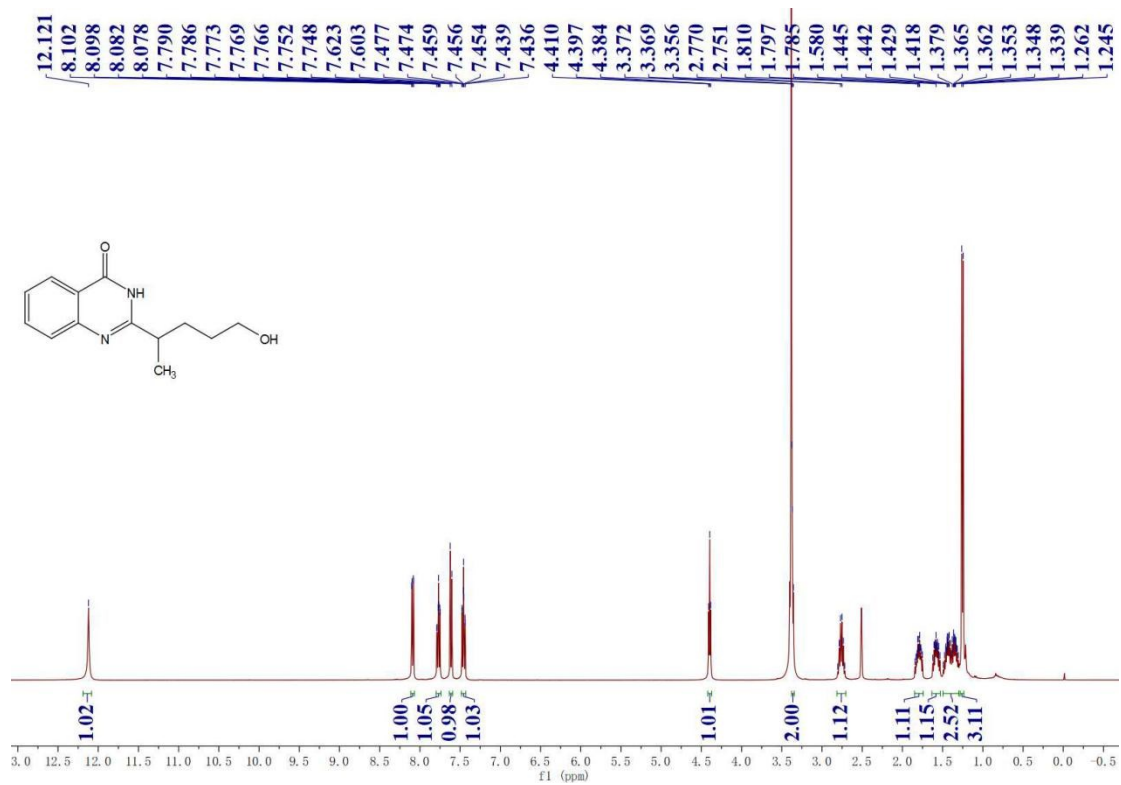

**<sup>13</sup>C NMR of 3p**

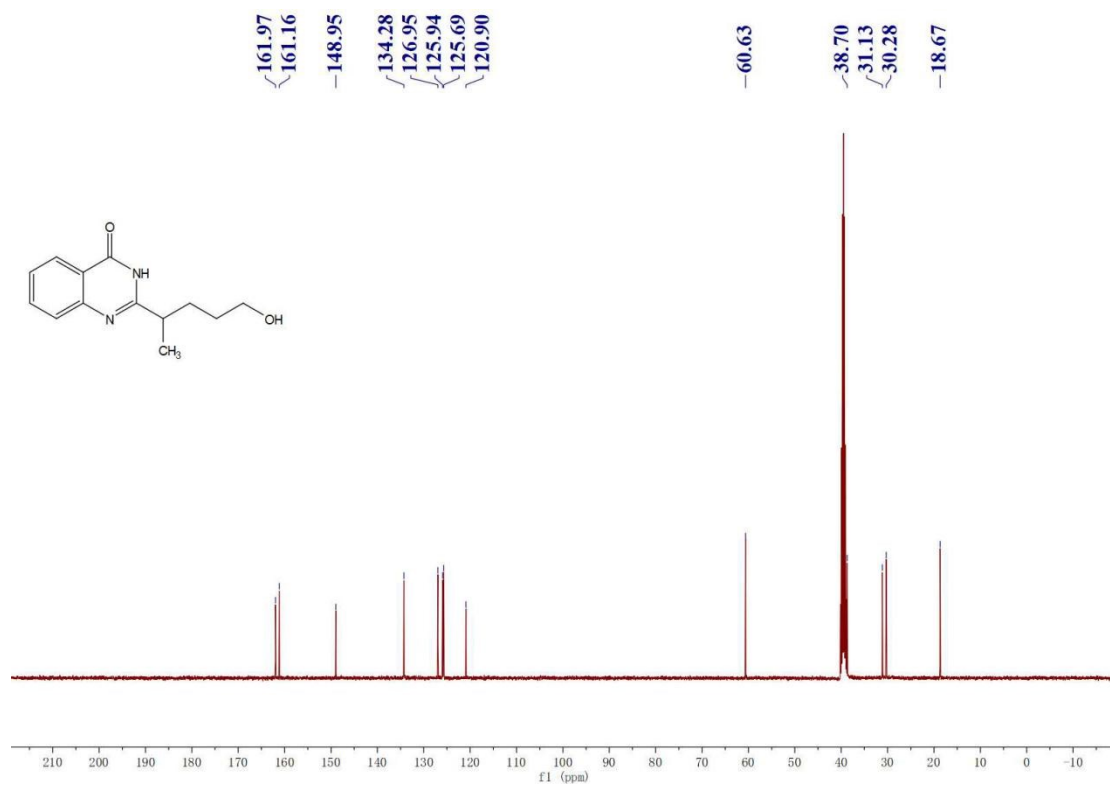

### <sup>1</sup>H NMR of 3q

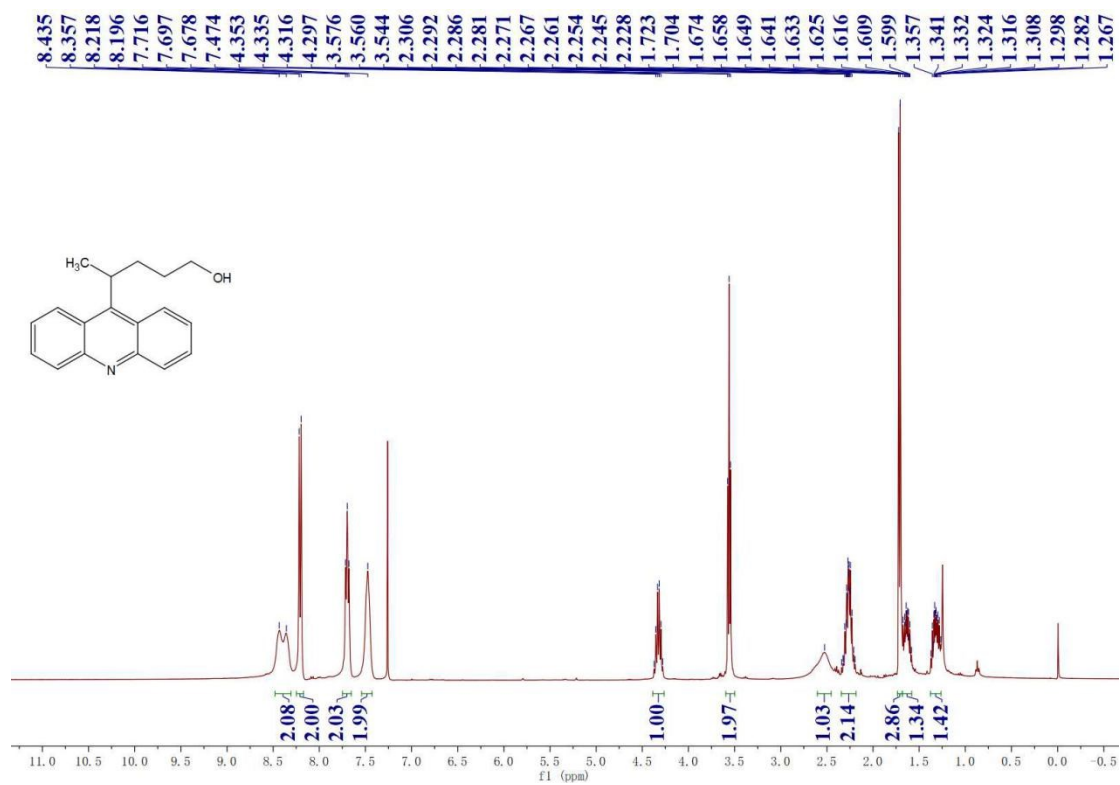

### <sup>13</sup>C NMR of 3q

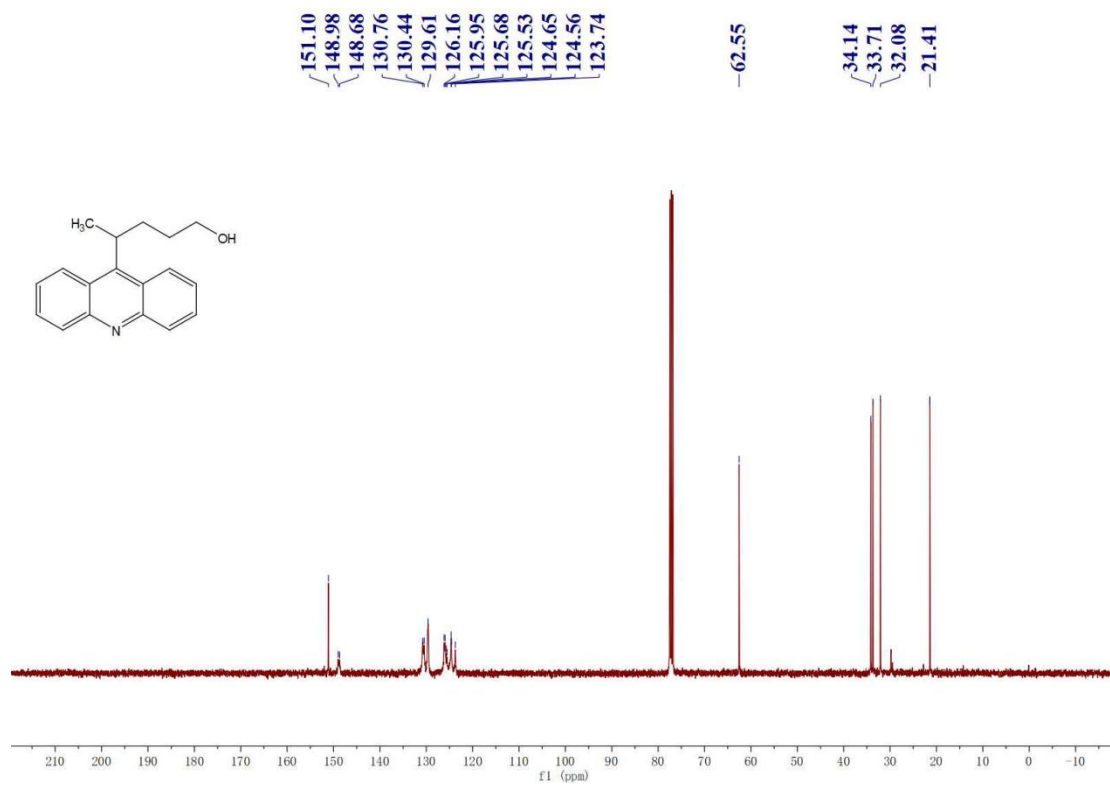

<sup>1</sup>H NMR of 3r

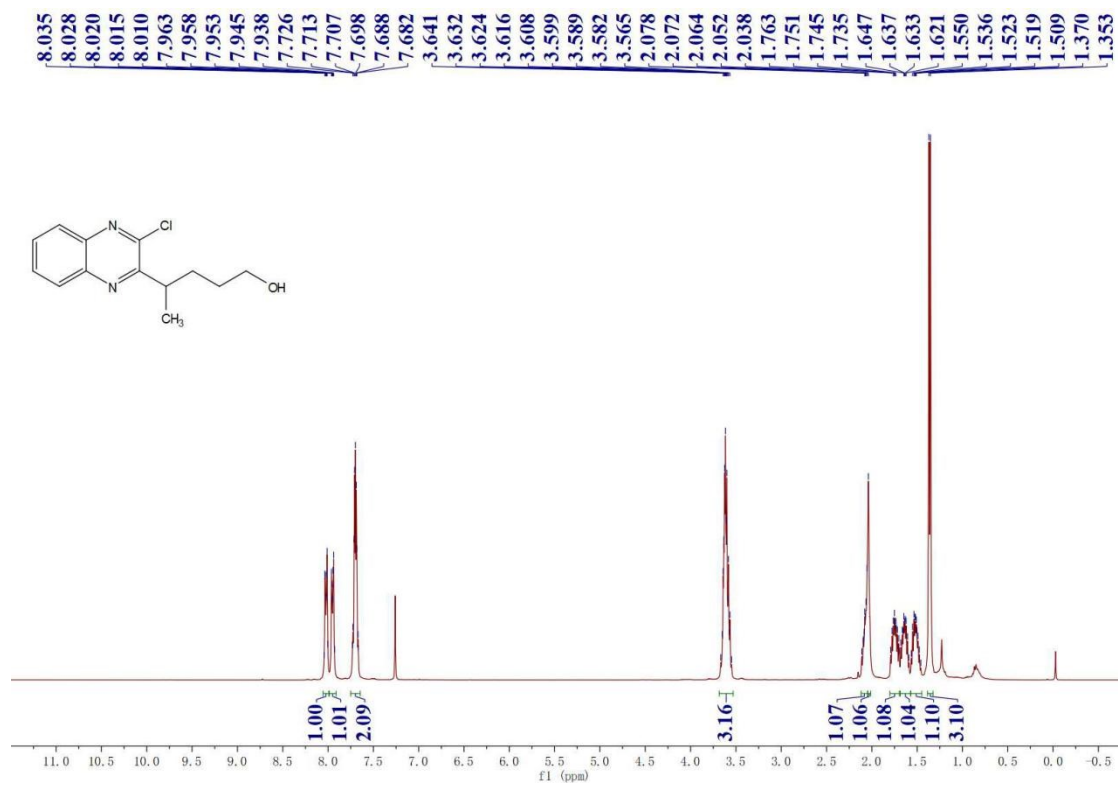

**<sup>13</sup>C NMR of 3r**

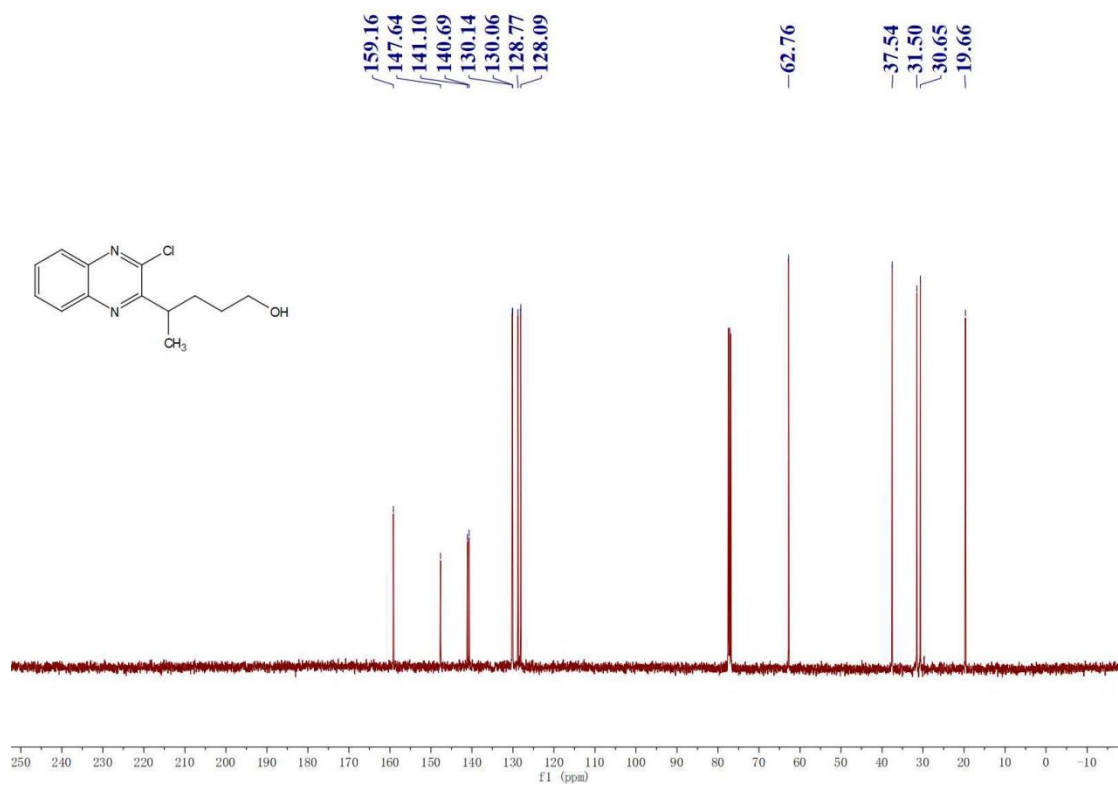



### <sup>1</sup>H NMR of 3s

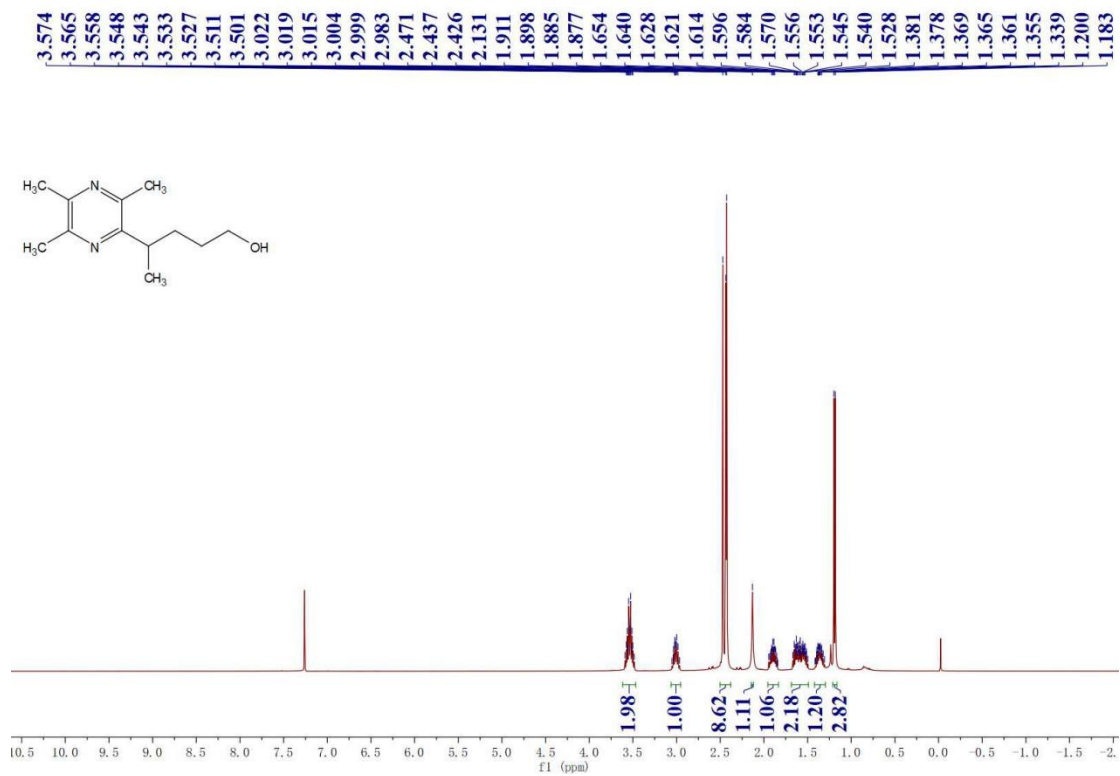

### <sup>13</sup>C NMR of 3s

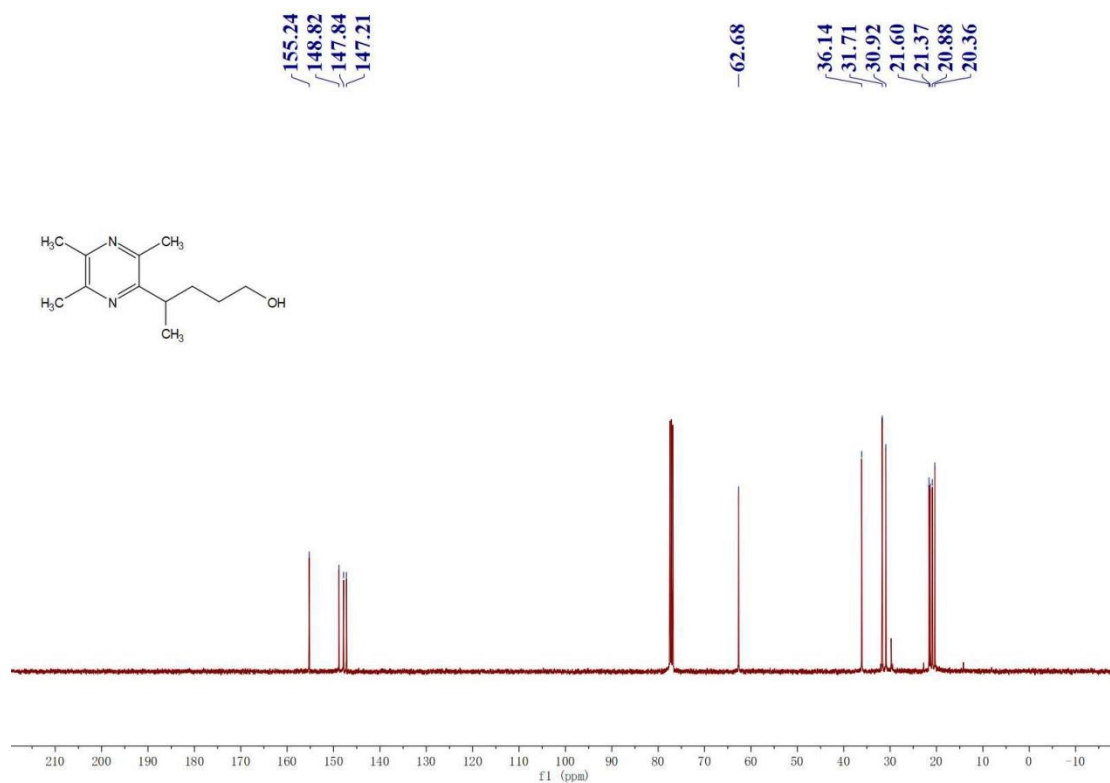

### <sup>1</sup>H NMR of 3w

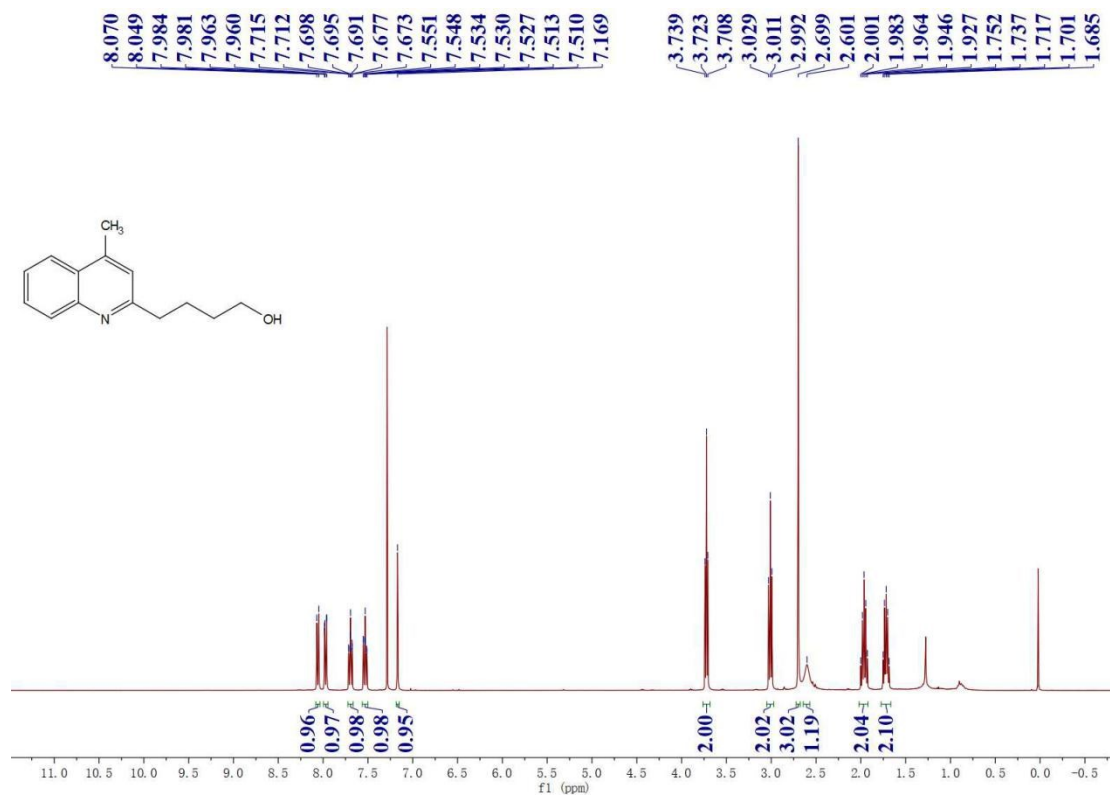

### <sup>13</sup>C NMR of 3w

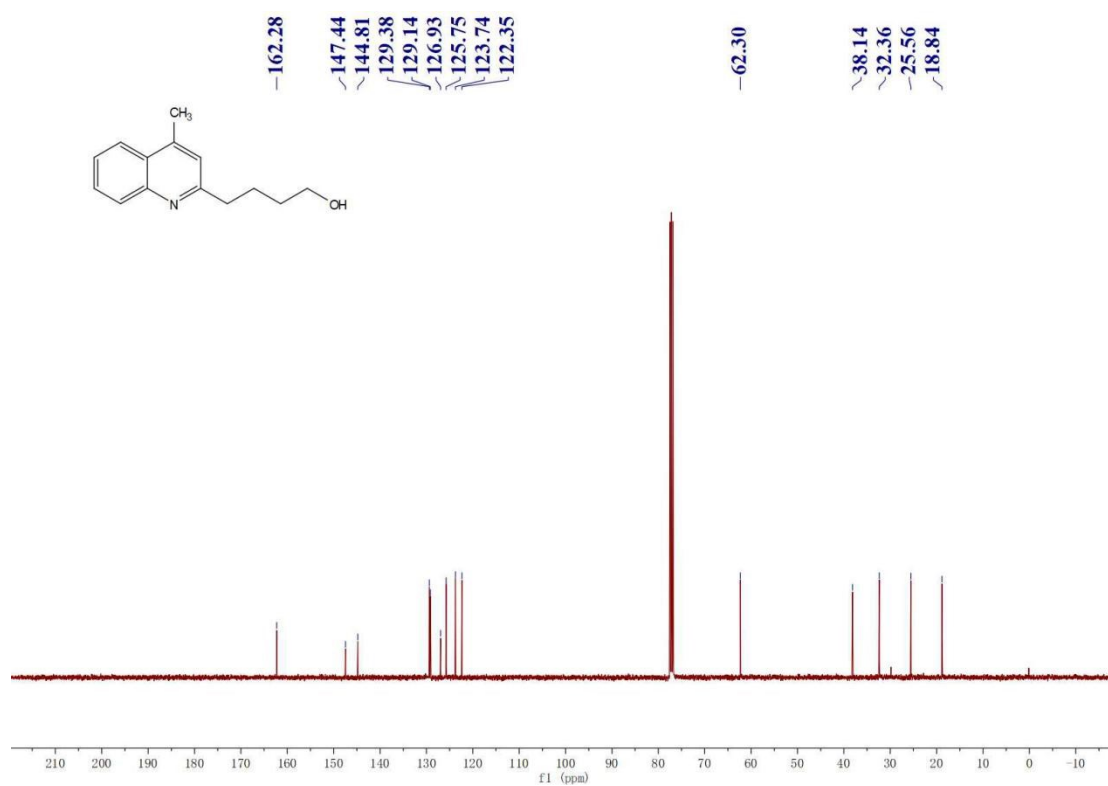

### <sup>1</sup>H NMR of 3x

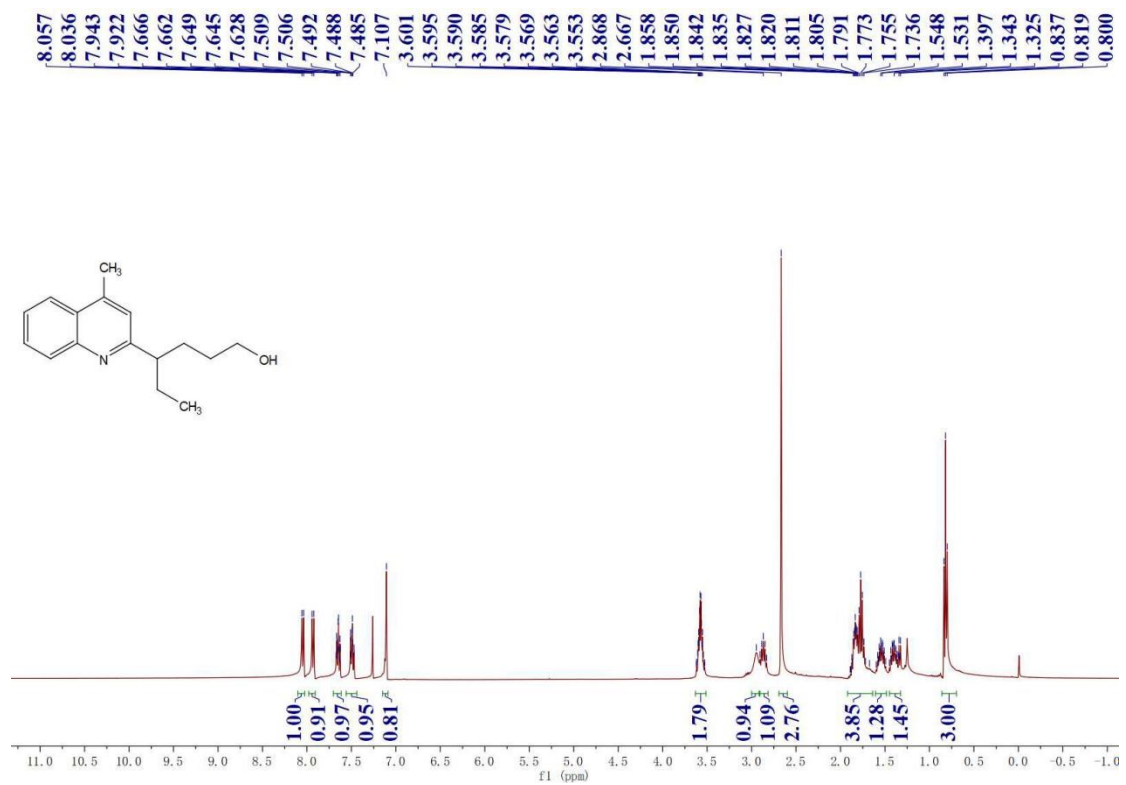

**<sup>13</sup>C NMR of 3x**

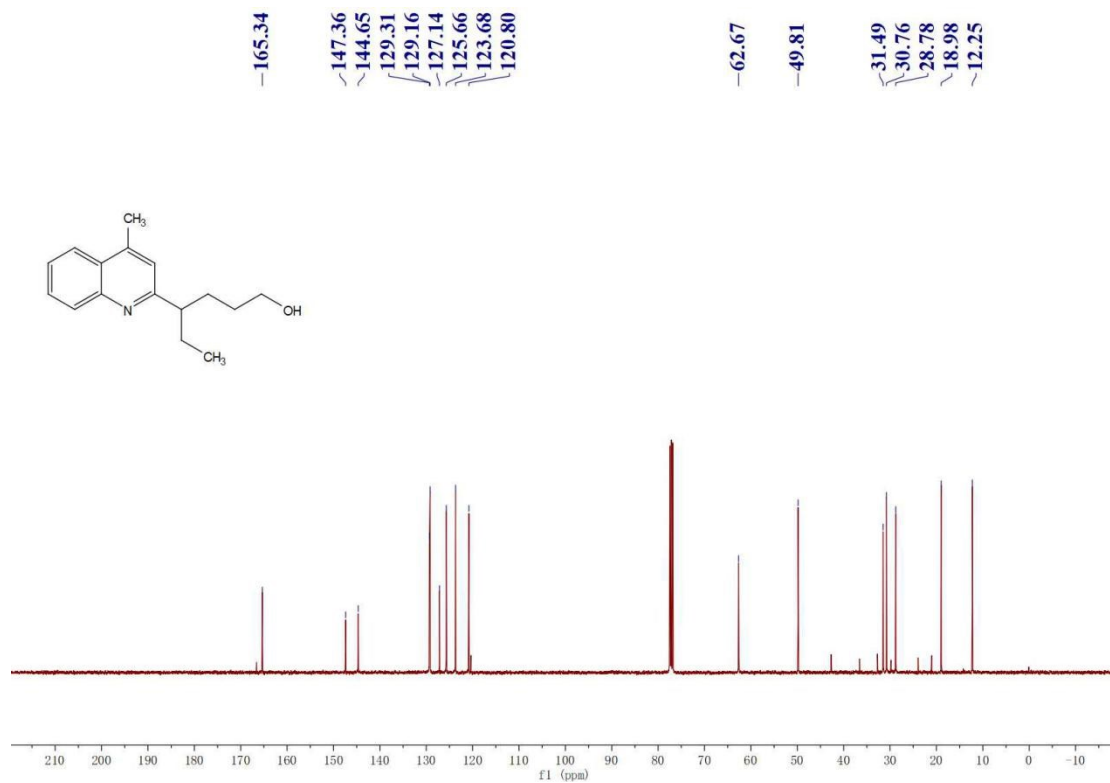

### <sup>1</sup>H NMR of 3y

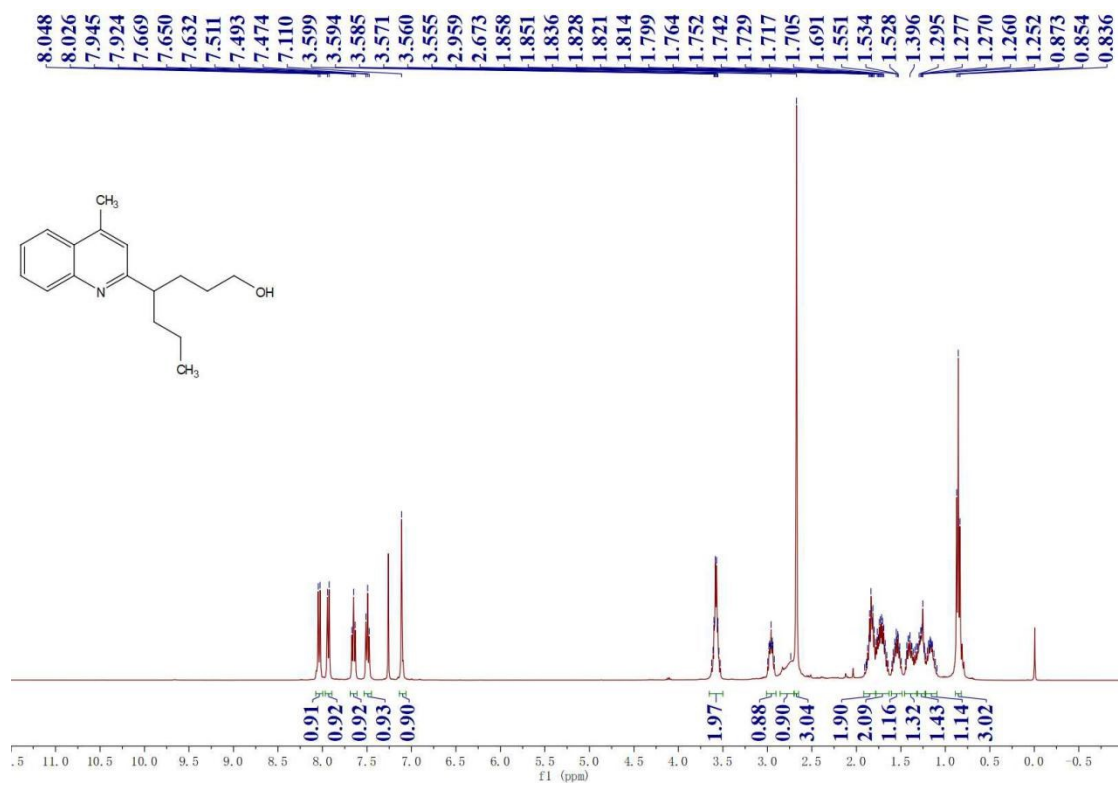

### <sup>13</sup>C NMR of 3y

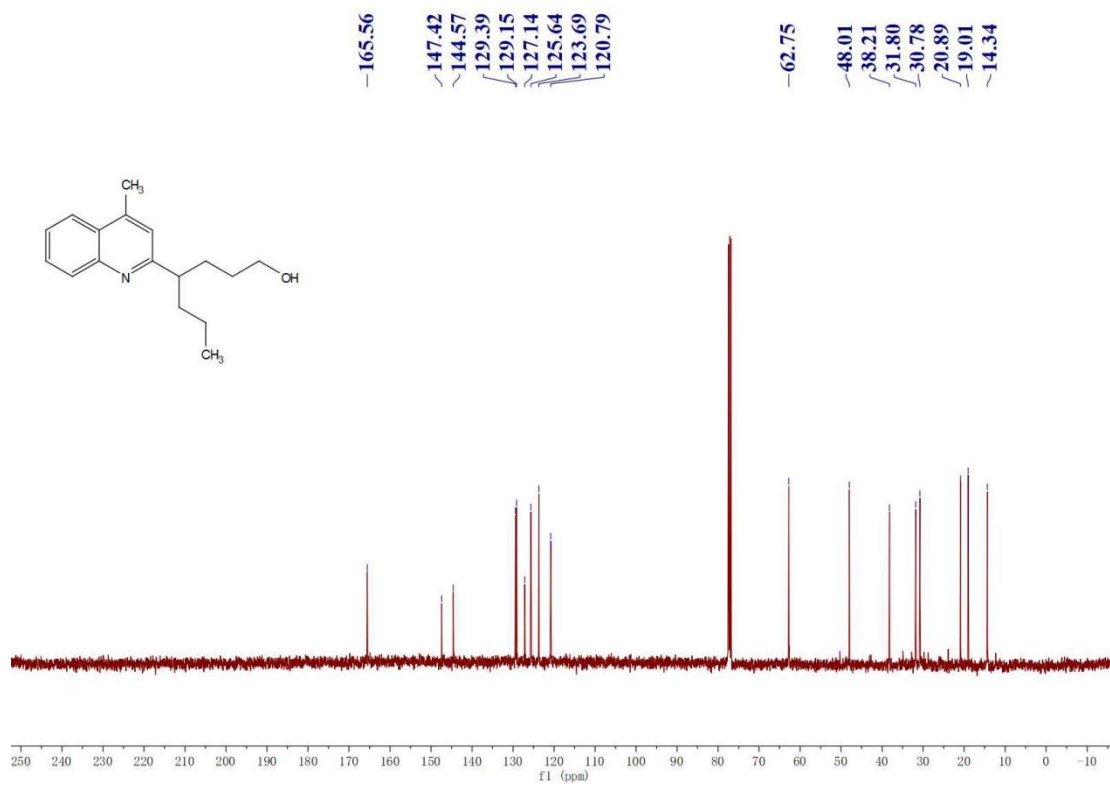

**<sup>1</sup>H NMR of 3z**

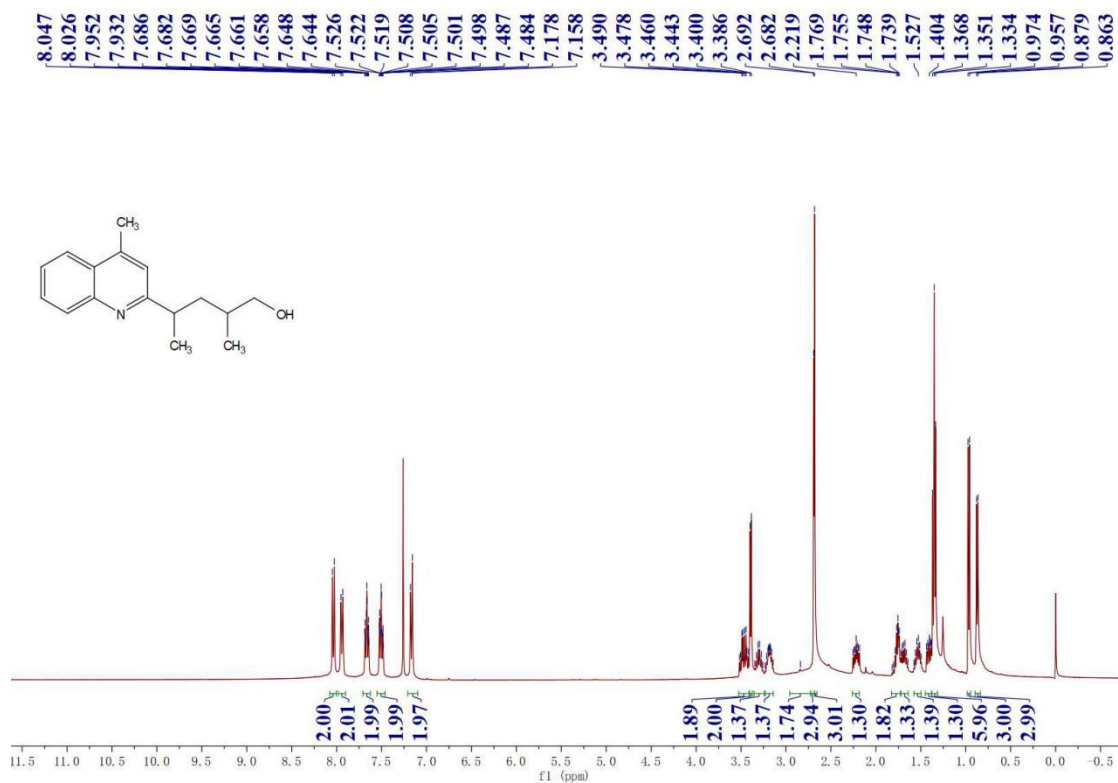

**<sup>13</sup>C NMR of 3z**

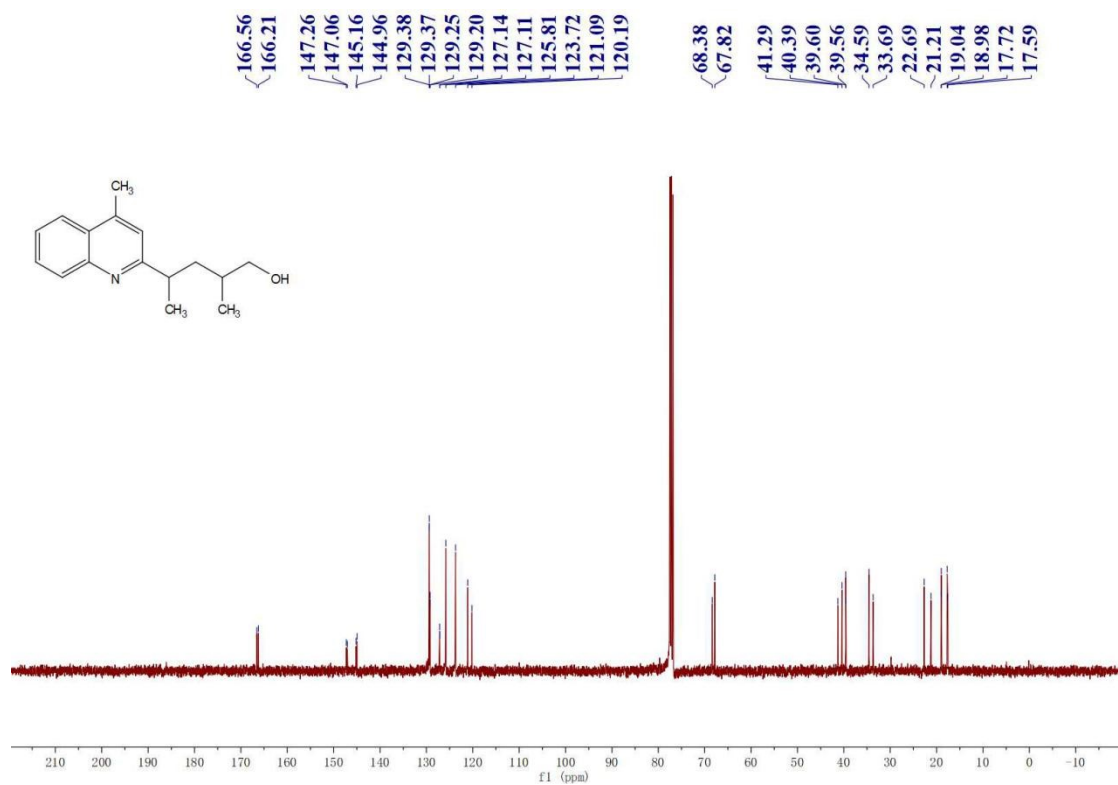

### <sup>1</sup>H NMR of 3aa

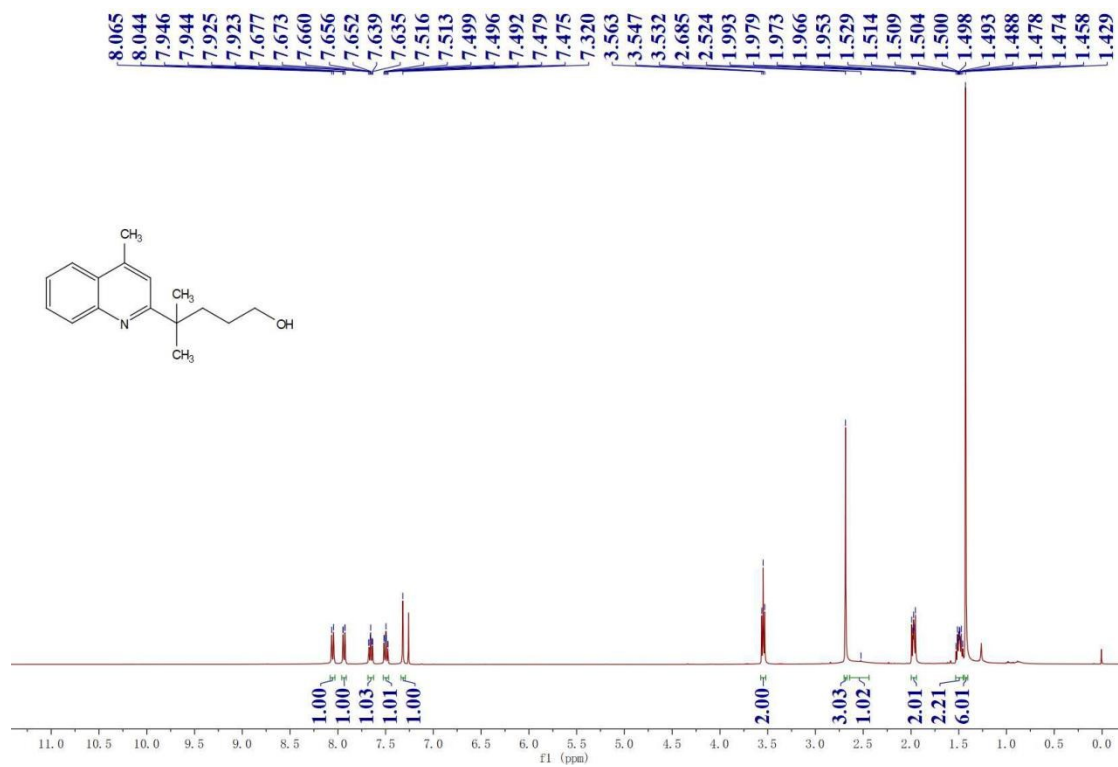

### <sup>13</sup>C NMR of 3aa



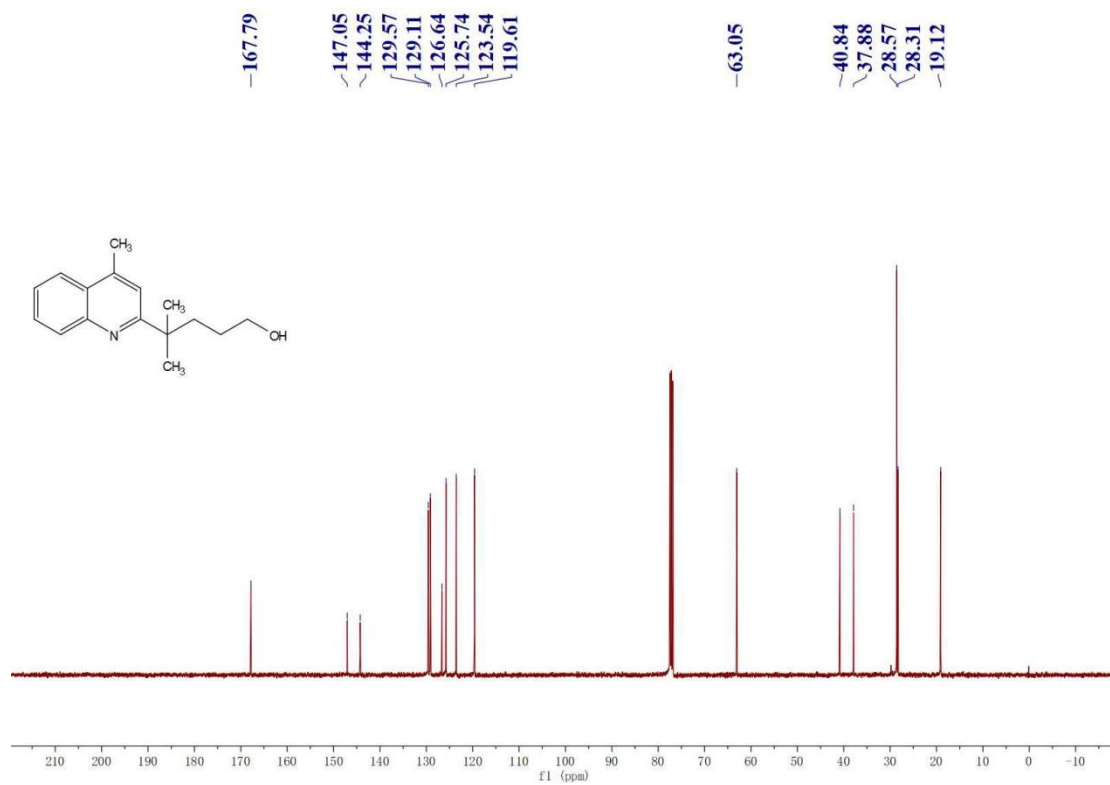

**<sup>1</sup>H NMR of 3ab**

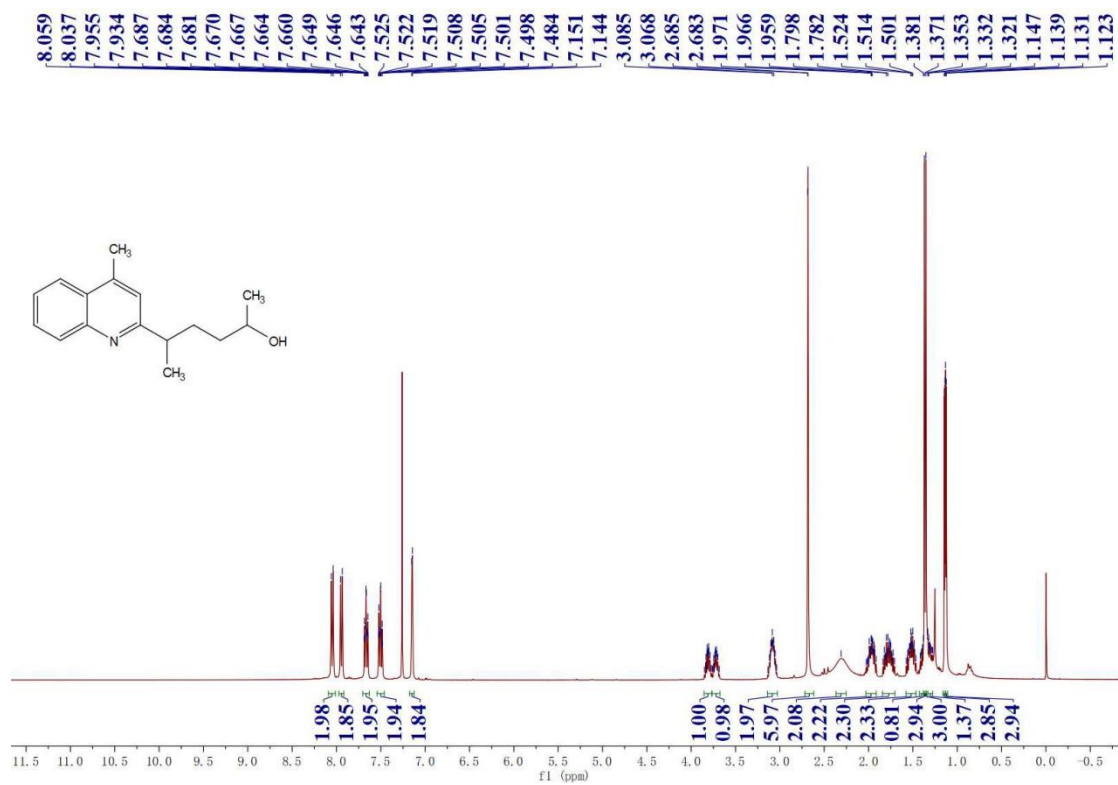

**<sup>13</sup>C NMR of 3ab**

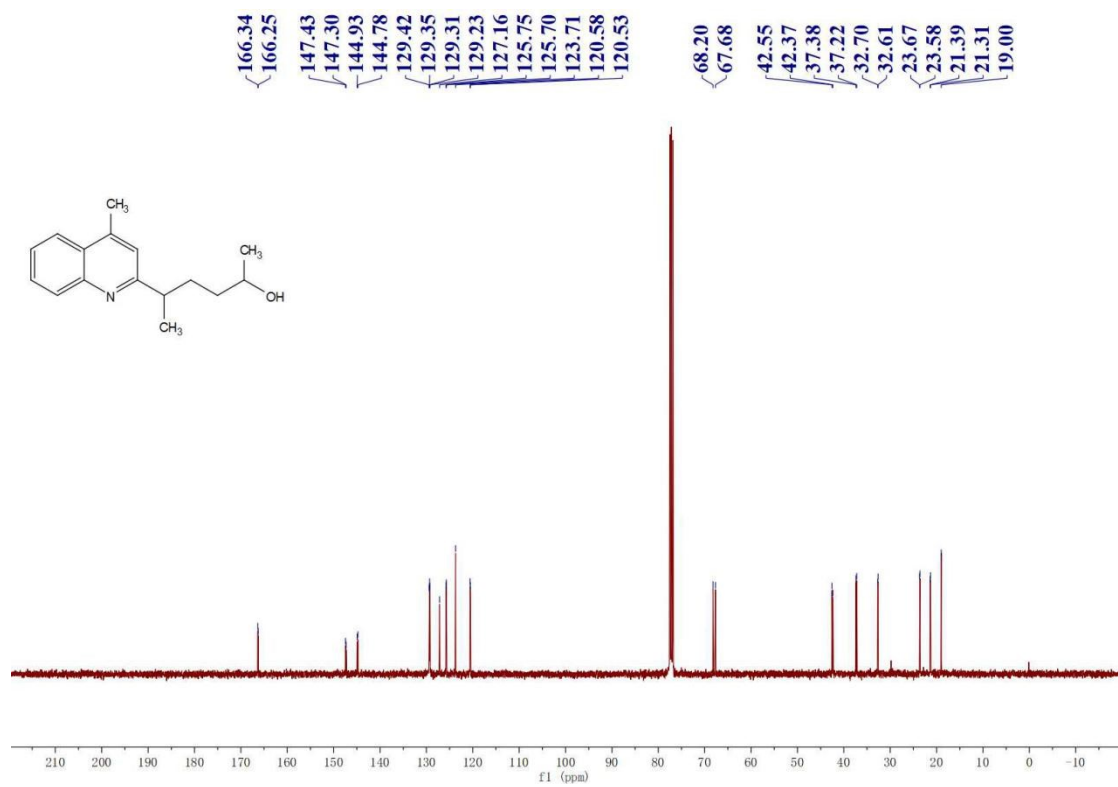

### <sup>1</sup>H NMR of 3ac

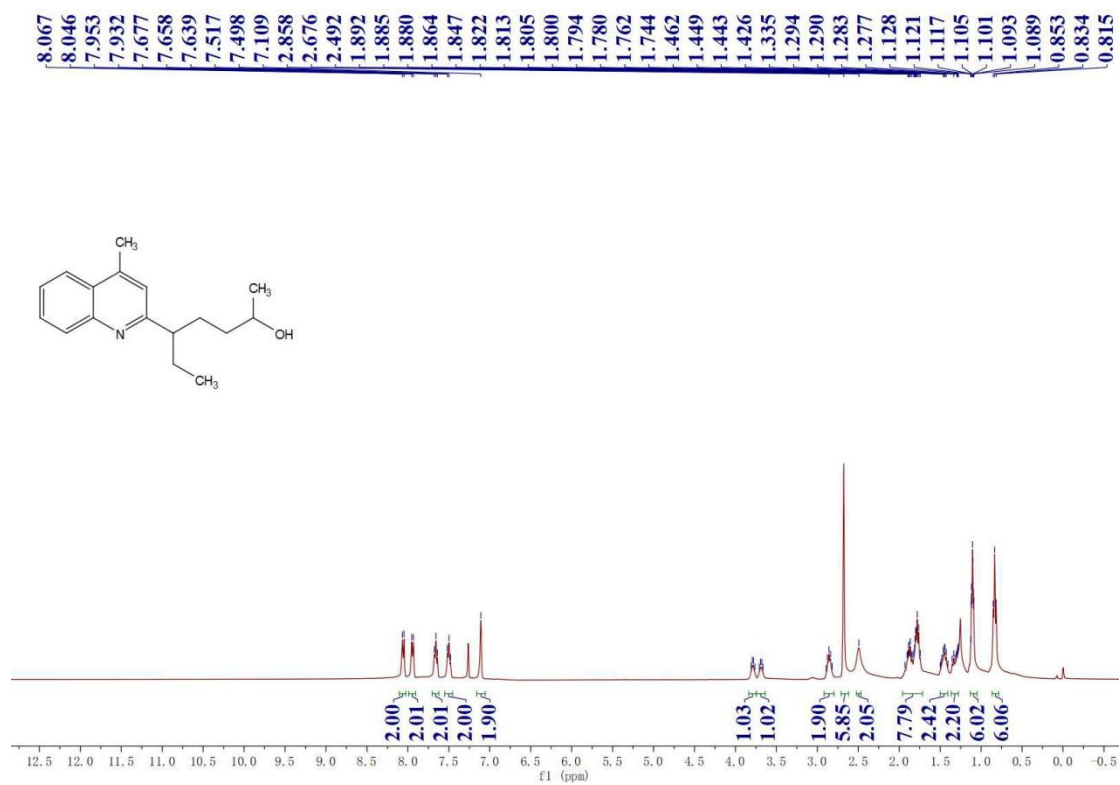

### <sup>13</sup>C NMR of 3ac

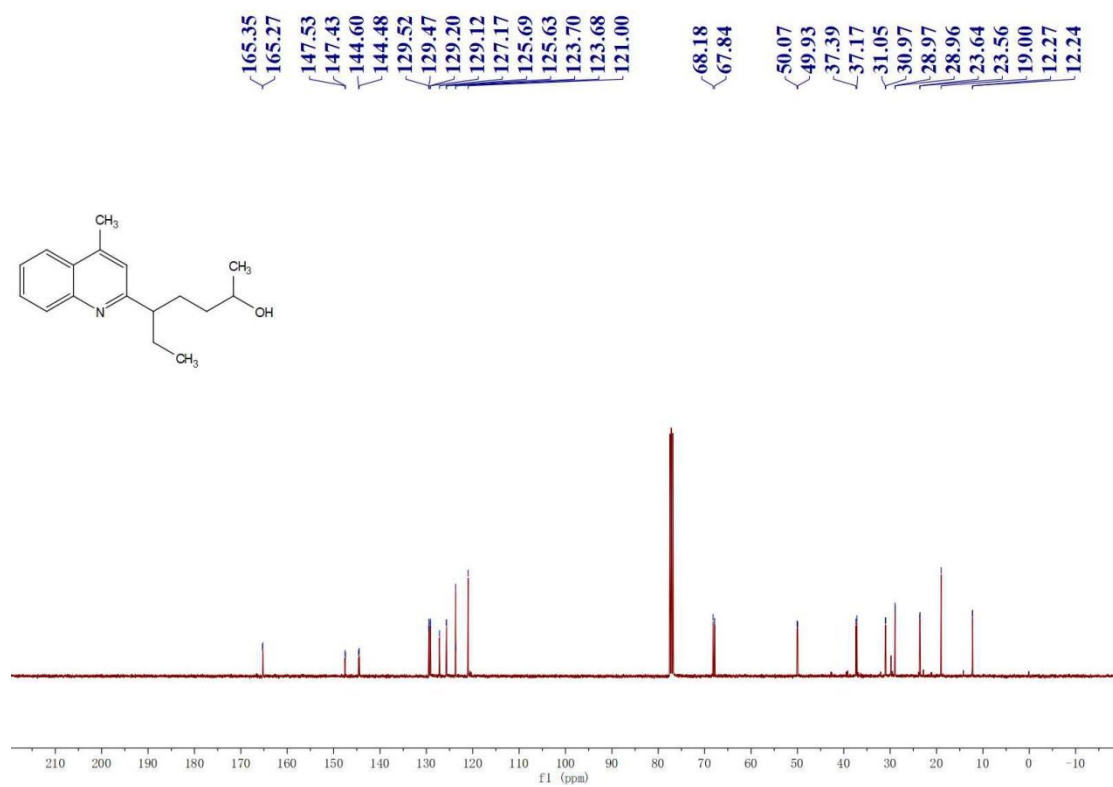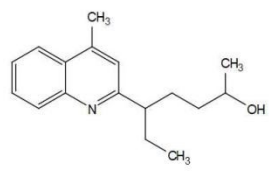

**<sup>1</sup>H NMR of 3ad**

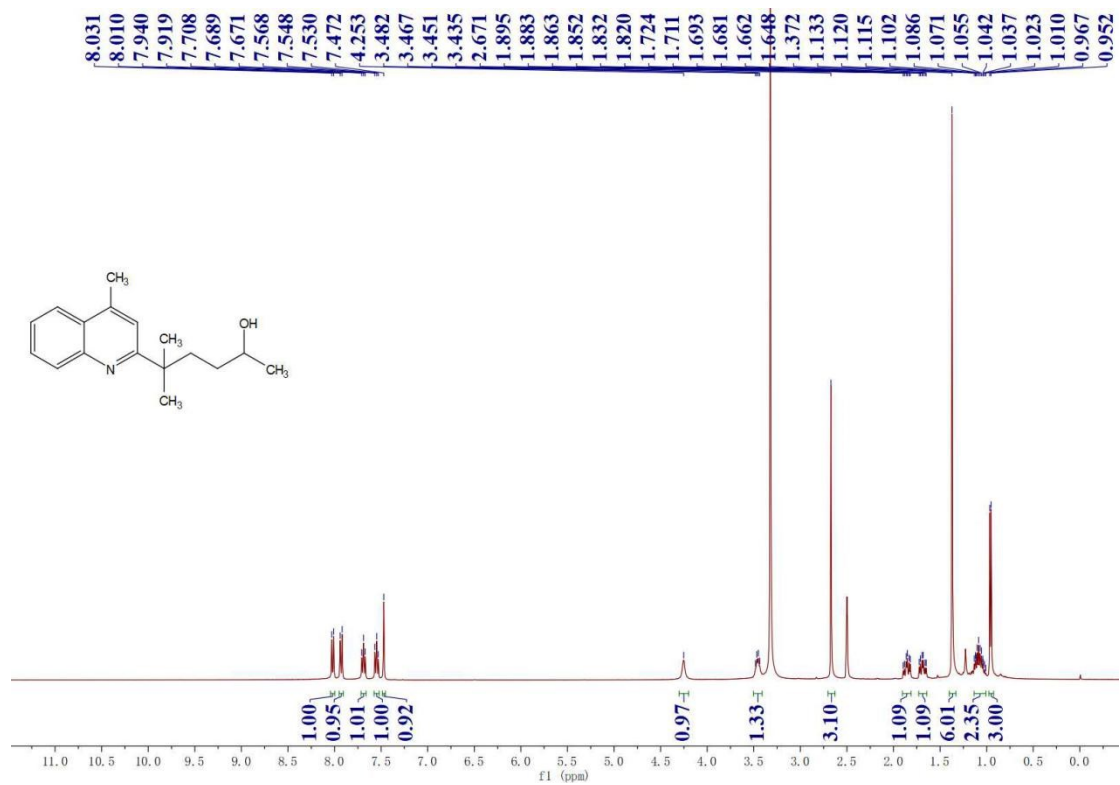

**<sup>13</sup>C NMR of 3ad**

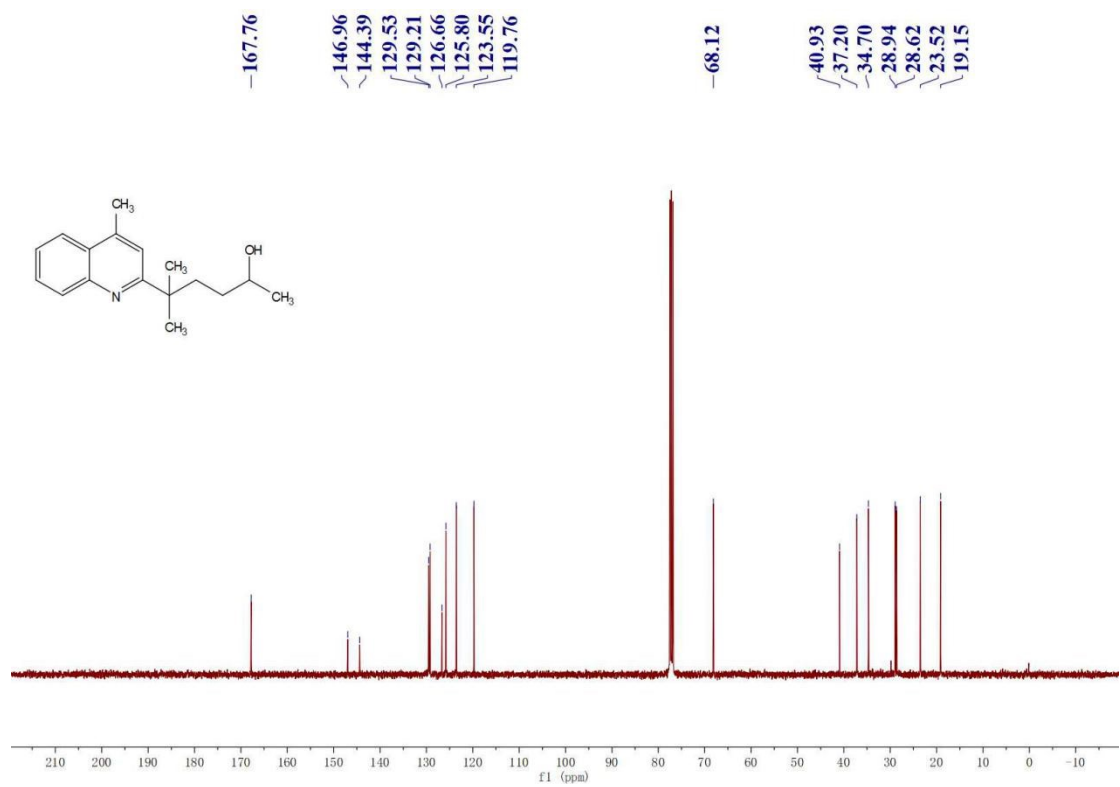

### <sup>1</sup>H NMR of 3ae

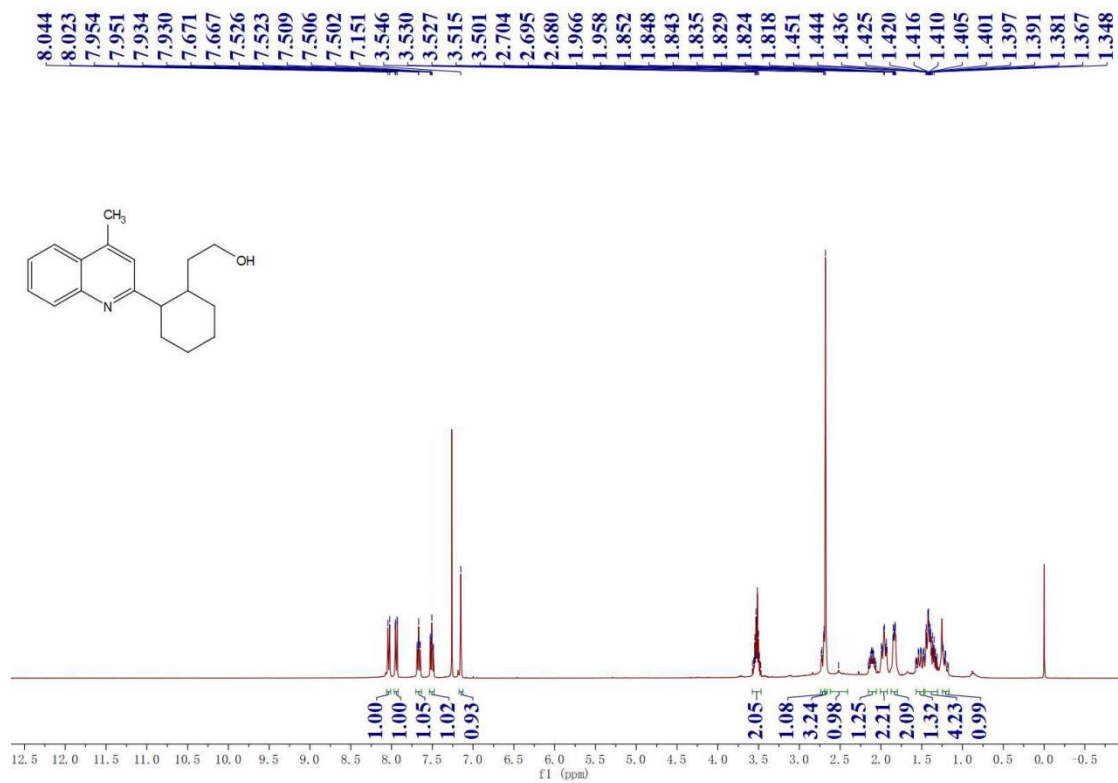

### <sup>13</sup>C NMR of 3ae

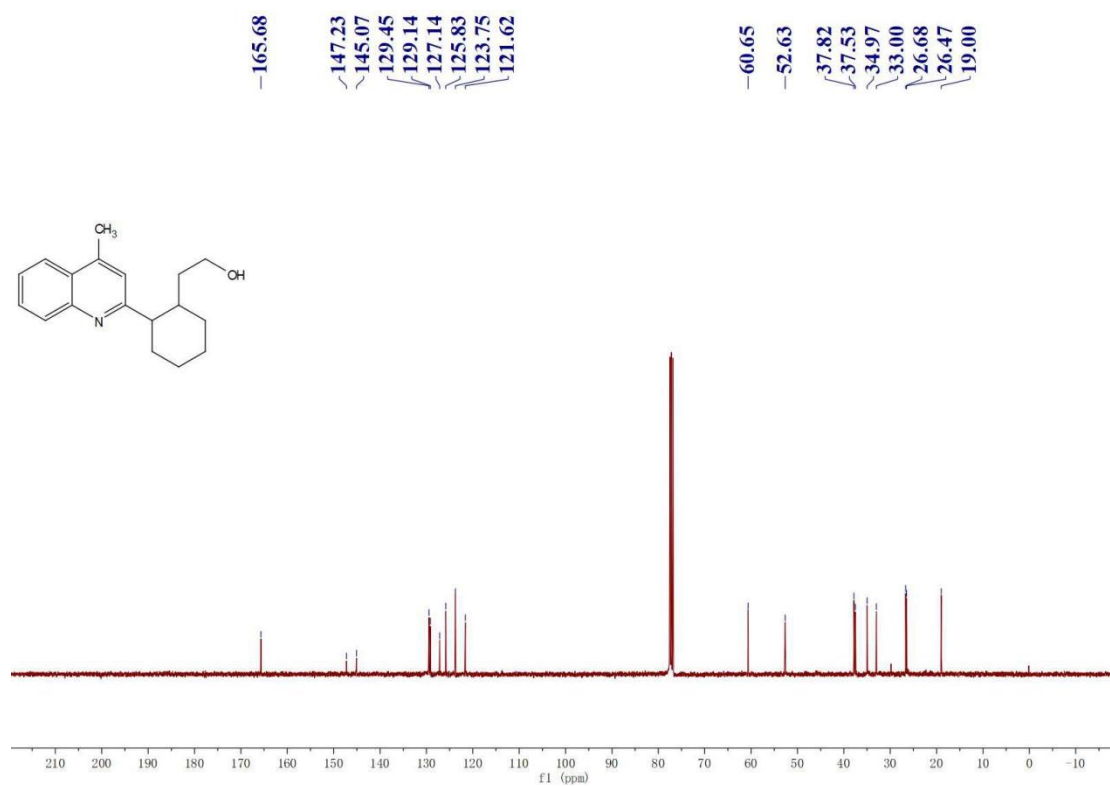

### <sup>1</sup>H NMR of 3af

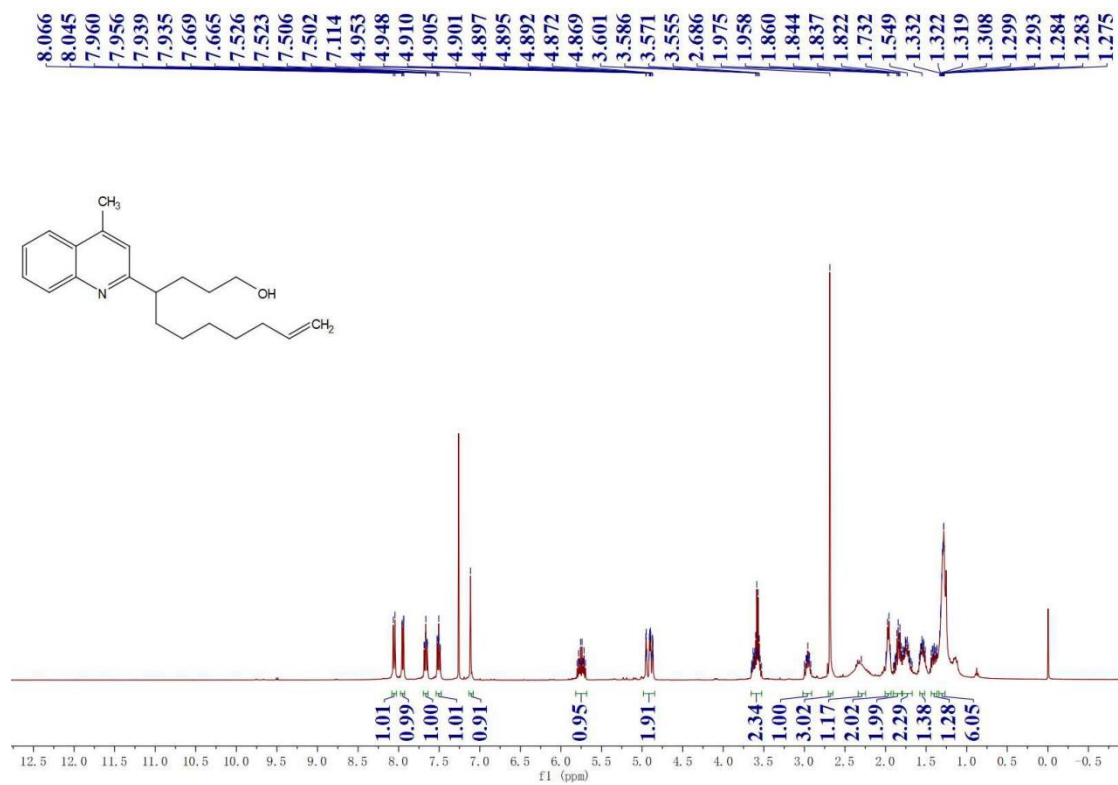

**<sup>13</sup>C NMR of 3af**

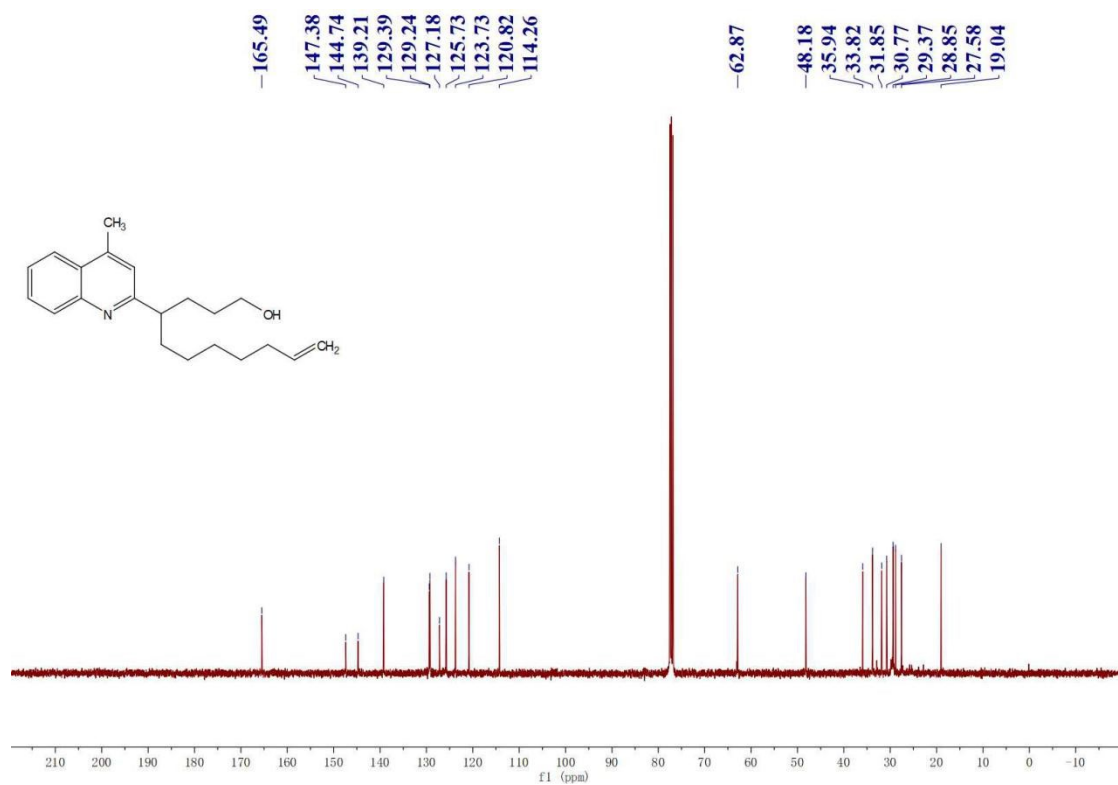



### <sup>1</sup>H NMR of 3ag

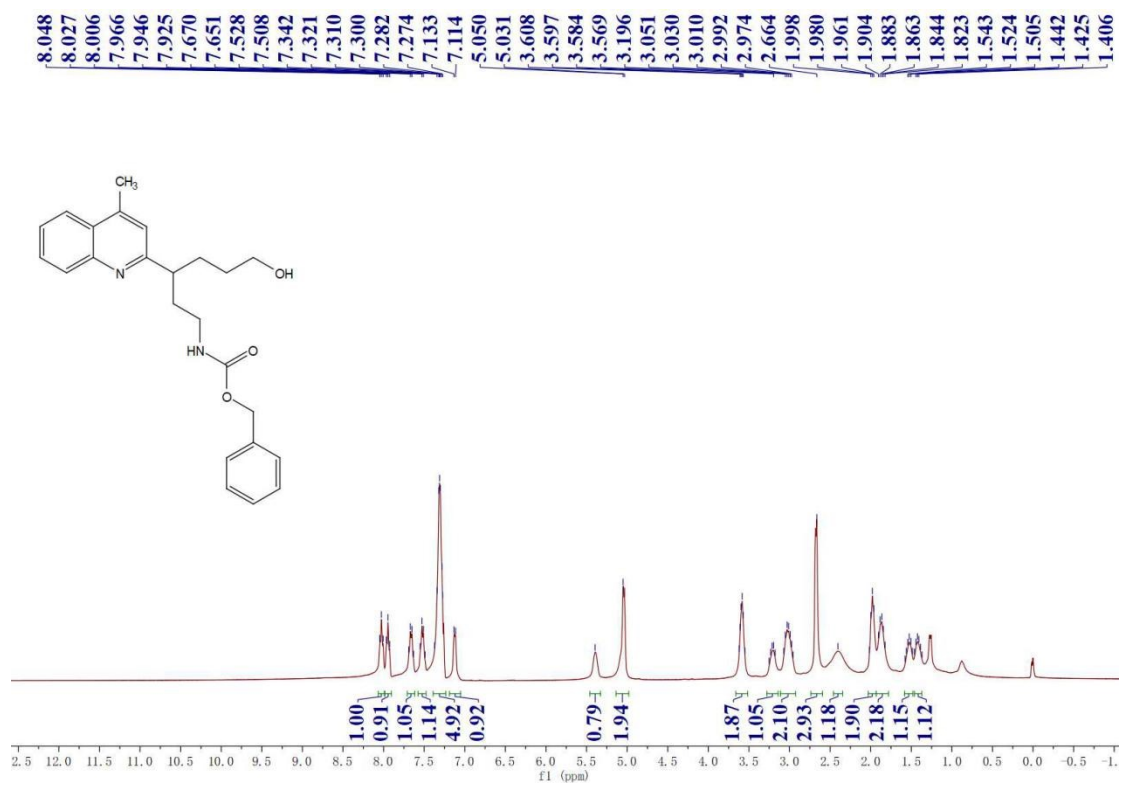

### <sup>13</sup>C NMR of 3ag

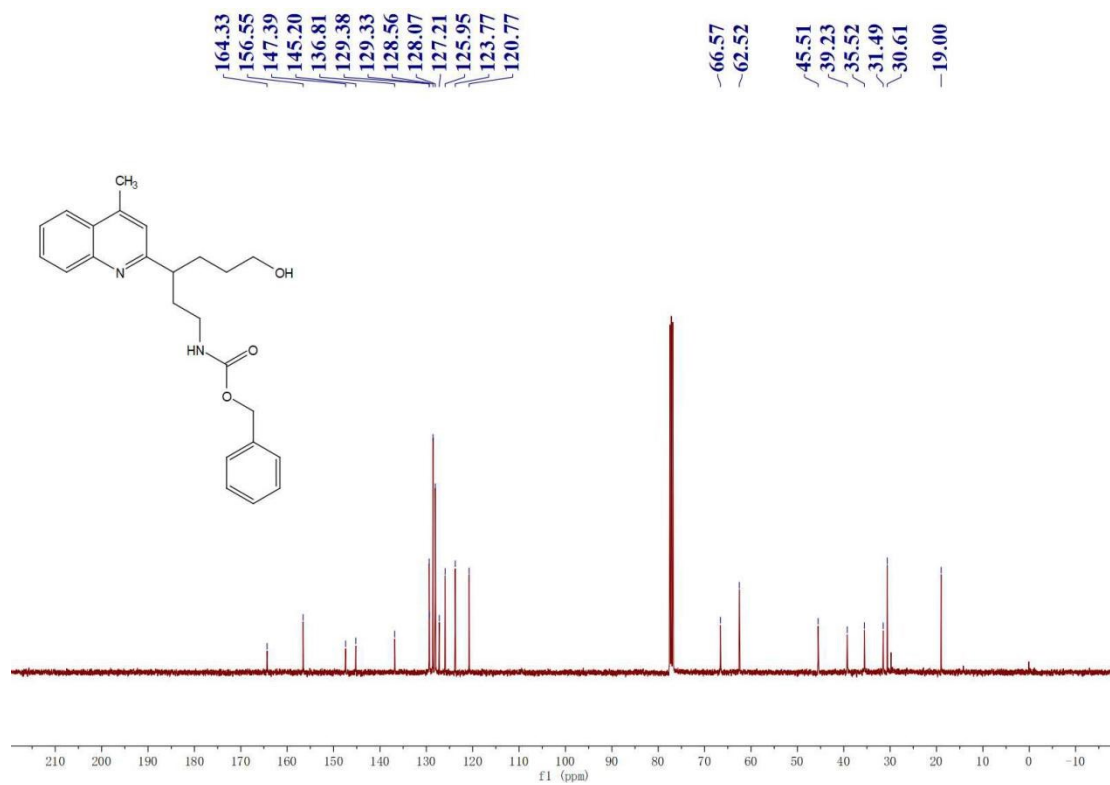

**<sup>1</sup>H NMR of 3ah**

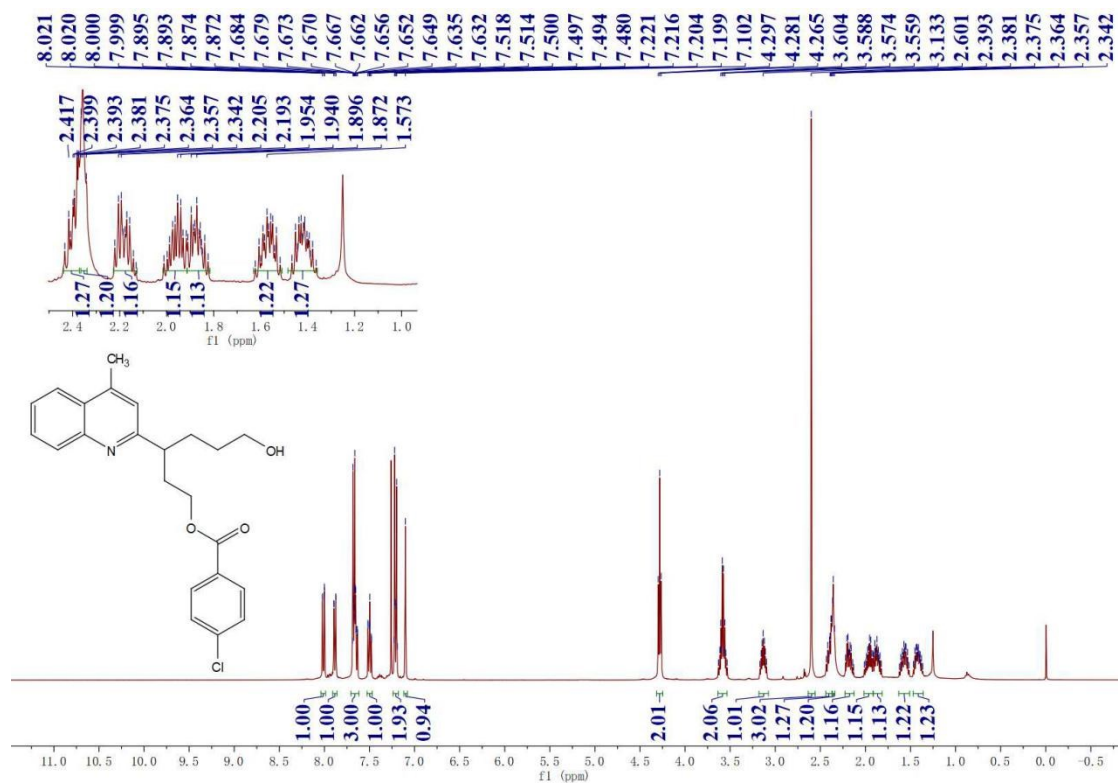

### <sup>13</sup>C NMR of 3ah

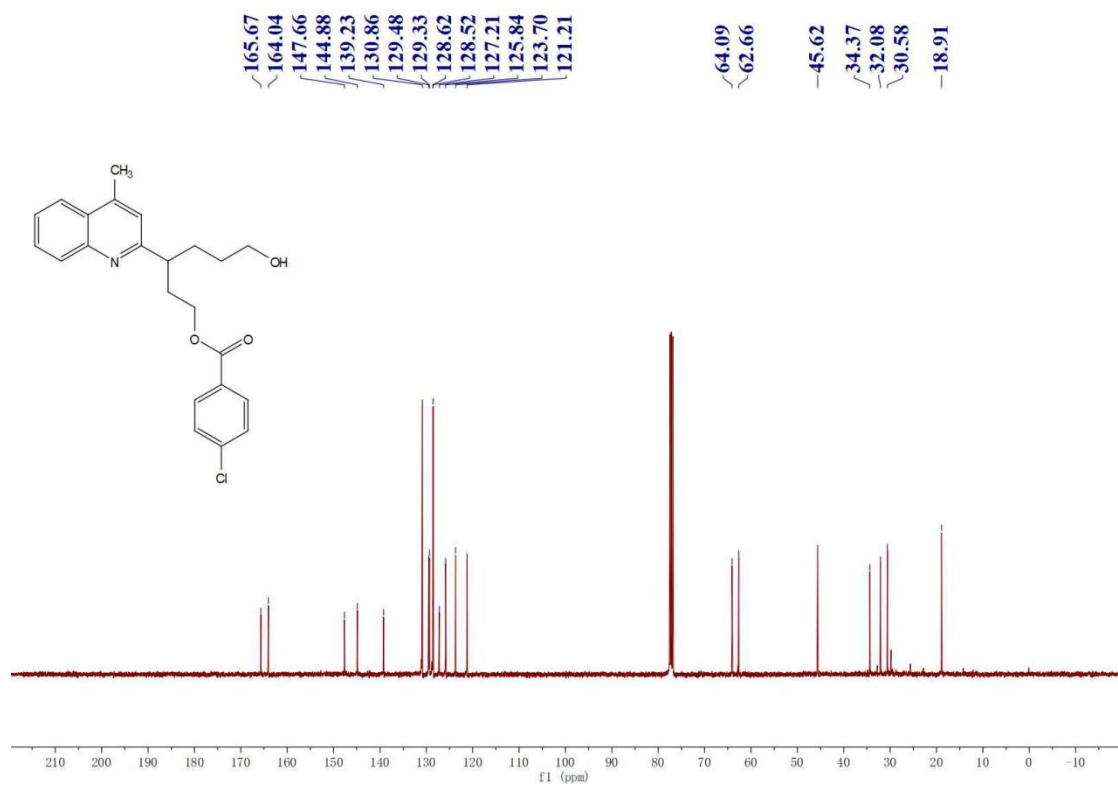

### <sup>1</sup>H NMR of 3ai

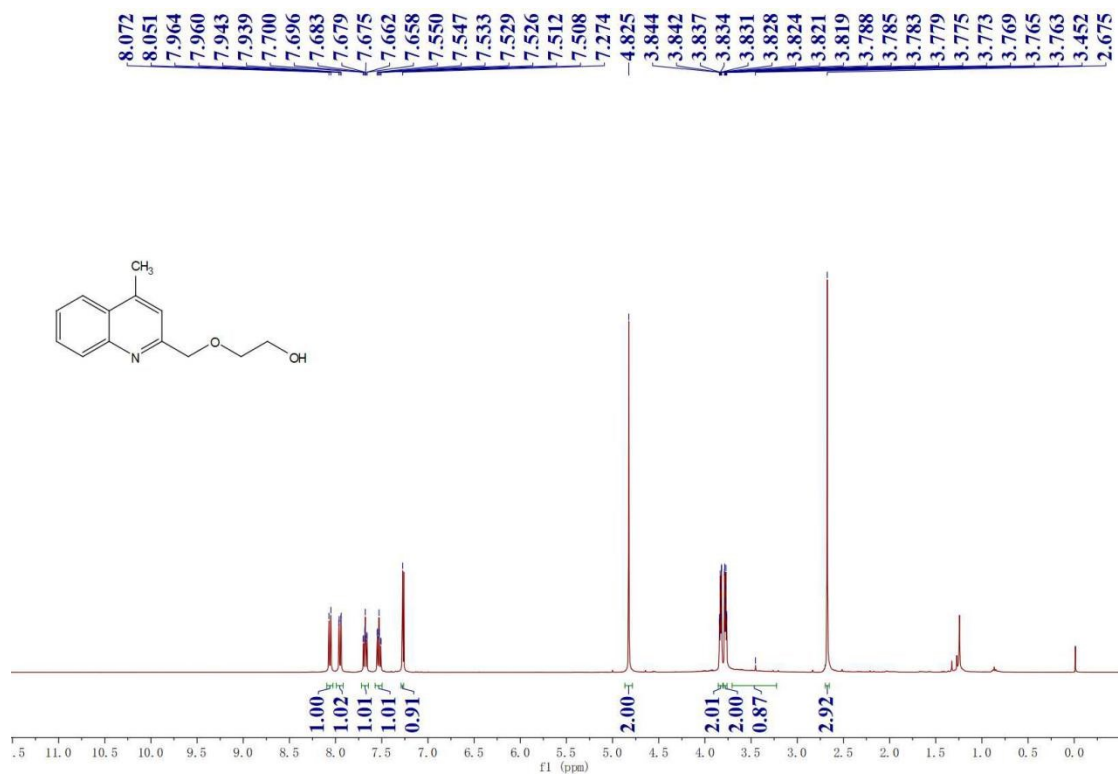

### <sup>13</sup>C NMR of 3ai

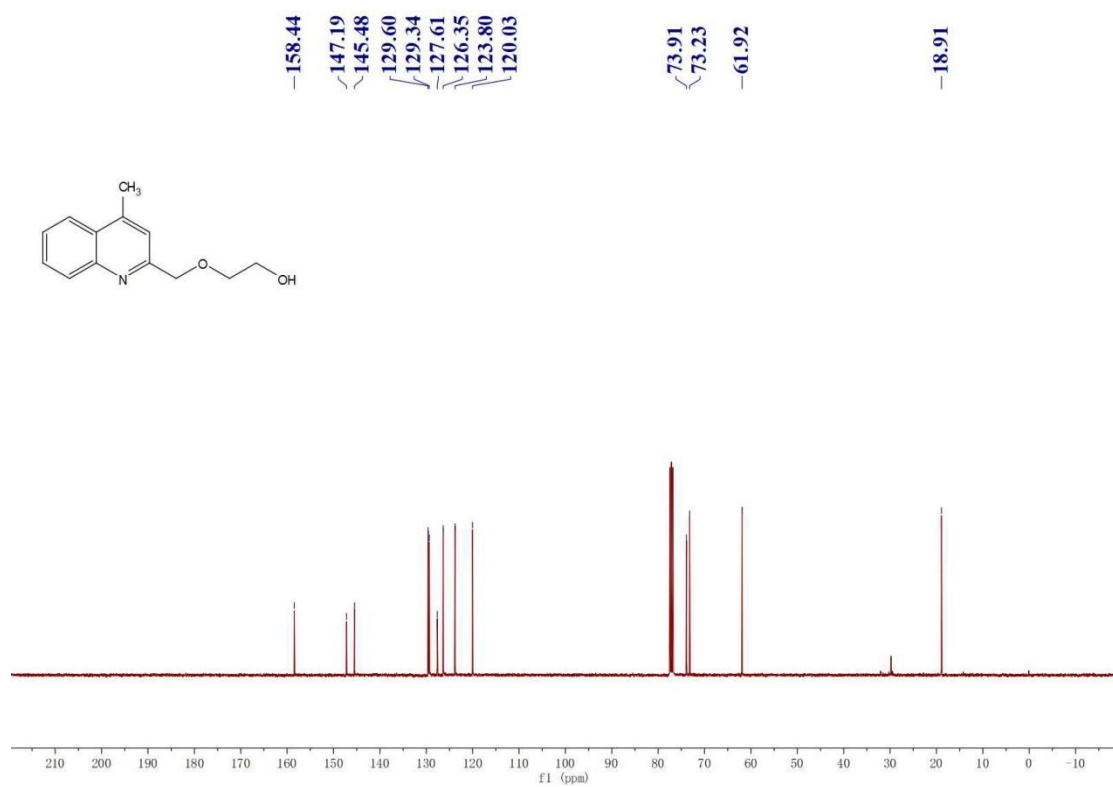

Supplement: d0qo01238f1.pdf [file d0qo01238f1.pdf]
